# Supplementary material for: Changes in clouds and thermodynamics under solar geoengineeringand implications for required solar reduction
Source: Copernicus journal article supplement (doi:10.5194/acp-2018-345), 2018-04-16
Supplement: Supplementary file [file acp-2018-345-AC1-supplement.pdf]

Responses to Reviewer Comments on “Changes in clouds and thermodynamics under solar geoengineering and implications for required solar reduction”, by Rick Russotto and Thomas Ackerman

Responses are in blue below individual comments. Appended to this document are a redlined manuscript showing the changes, a clean revised manuscript, and a revised version of the Supporting Information. In addition to the changes in response to these comments, some minor edits have been made to the discussion of LTS and EIS changes in response to Rob Wood’s comments on Rick Russotto’s doctoral dissertation.

## **Reviewer 1**

In the G1 simulation of GeoMIP it is attempted to reach TOA radiative balance under instantaneous quadrupling of CO<sub>2</sub> by a decrease of solar irradiance. It had been recognized earlier that the solar constant has to be reduced more than estimated using simple assumptions, i.e. a change of solar irradiance seems less effective than the changing CO<sub>2</sub>, but to my knowledge, the reasons for this behavior had not been comprehensively analyzed. This paper closes this gap in a, in my opinion, very convincing way, at least to the extent this is possible with the available model output. The authors have used direct analysis of model output and the technique of radiative kernels to infer that the LW adjustment due to changes in atmospheric (in particular stratospheric) temperatures and the SW adjustment related to decreasing low cloud cover in G1 are the largest contributors to the underestimation of the necessary solar constant reduction. I think these results are very useful for the discussion of solar geoengineering methods but also for understanding responses to solar and GHG forcing. I find the paper in general very well written, and the selection and quality of tables and figures very appropriate.

In summary I recommend publication of this paper after consideration of the following minor issues:

- P5L20: “ant”

This typo has been corrected in the revised version.

- In several places, the overall cooling in the free troposphere is mentioned, which is explained with the surface cooling and the temperature profile following a moist adiabat (page 6). However, the globally averaged surface temperature does not increase in G1. It would be useful to mention why the tropical cooling dominates the temperature change in the free troposphere.

It is difficult to find discussion of this issue in existing papers (like Govindasamy et al. 2003), and it is not immediately obvious what the explanation is. It could be that the cooling throughout the free troposphere is due to poleward advection of the cooled tropical upper tropospheric air by the Hadley circulation, or that less water vapor is available to heat the upper atmosphere through latent heating arising from local deep convection. Absent time to thoroughly explore this issue, we do not explicitly address it.

- P9L18: It is argued that a reduction in low clouds would partially counteract the cooling from solar geoengineering. However, the authors do are not able to discriminate if CO<sub>2</sub> or solar irradiance changes lead to the adjustments. Hence, I don’t understand why this change in clouds is related to the irradiance change.

The word “counteract” has been replaced with “offset”, which seems less likely to imply that the clouds are definitely caused by the sunlight reduction. (We don’t explicitly state this anywhere, and say in the conclusions that we don’t know the relative contributions of the solar vs. CO<sub>2</sub> forcings to the adjustments.)

- Table 3: It might be useful to add a line with the multi-model mean (which is even referred to in the text) to this table, and possibly also Table 2.

Multi-model means have been added to Tables 2 and 3.

- At some places (e.g. P22L8) the authors talk about something “predicted” by Eq. 8. I think it would be useful to mention already early (it is done only in the Conclusions) that this is a prediction in hindsight, based on the analysis of the model results, or even avoid the word “prediction”.

See response to Reviewer 2’s first major comment.

- Last paragraph of Section 4. I’m wondering if this shouldn’t go to Section 3.

We have left this paragraph where it is because it follows the first introduction of the instantaneous forcing estimates.

- P25L17: I find the remark on a “smaller-scale geoengineering test” not specific enough. What means smaller? I think also the reference is unfortunate, because Keith et al. (2014) only cite another paper (McMynowski et al., 2011) for providing an estimate of what small could mean and I have the impression they cite them wrongly. So I’d suggest to rather cite the original publication and be a bit more specific.

We have added a reference to the McMynowski et al. paper and clarified what is meant by smaller scale (about 1/10<sup>th</sup> the radiative forcing relative to deployment, and lasting about a decade).

- P25L21: “If solar geoengineering was attempting to cool the planet instead of simply preventing future warming ... then temperature dependent feedbacks ...” I don’t understand this statement. It all depends on the reference. If it is preindustrial climate then also a stabilization would include temperature feedbacks. And in the case of a cooling these would depend on the amount of cooling.

We have expanded on this discussion a bit to provide examples of what a cooling scenario might look like, and to acknowledge this point but also emphasize that we would not be in an equilibrium situation and the operation of the feedbacks would be affected by the inertia associated with ocean heat storage.

## Reviewer 2

This manuscript presents multi-model analysis of simulations from the GEOMIP G1 experiment, in which CO<sub>2</sub> is quadrupled while the solar constant has been reduced sufficiently (through iteration) to achieve near zero global mean surface temperature change. The work is motivated by the observation that the required solar constant reduction is greater than the value that would exactly offset the effective radiative forcing from 4xCO<sub>2</sub> in the global mean planetary energy budget. Well-established tools such as radiative kernels and the APRP method are used to quantify the partial contributions of various cloud and clear-sky mechanisms to the total radiative changes in order to understand why a greater than expected solar constant reduction is required. A key finding is that there is a widespread, robust reduction in low cloud fraction in the models, which increases the necessary solar constant reduction to offset CO<sub>2</sub>-driven



warming. This cloud reduction is at least qualitatively consistent with widespread reductions in two different measures of lower tropospheric stability.

This manuscript was well-written (although I did find it rather long and wordy at times). The figures are good and I find no fault with any of the analyses. My main difficulty with this work is with the framing of the central question and many of the results. Equation (3) is just a statement of an energy budget. The authors state (page 5, line 15) that they will "test the hypothesis that the solar constant reduction can be predicted using Equation 3". I don't think there is any such hypothesis, because Equation (3) has no predictive power until the adjustment terms are known. And the sum of the adjustment terms are by definition what's needed to close the budget. So I see circular reasoning. The only way to use this framework to get  $\Delta S_0$  is to calculate the adjustments, but this is only done *a posteriori* by running the models. This is in fact noted by the authors several times (page 24, line 5; page 25, line 13). Given this limitation, I don't see why the authors are presenting this work as a test of such a hypothesis. The fact that the budgets approximately balance in Figure 11 is really just an approximate validation of the analysis techniques (kernels, APRP) – it does not represent a conceptual validation of any physical or predictive framework.

These criticisms of the framing of the results are valid. Relevant portions of the manuscript have been edited so that Equation 3 is not presented as a hypothesis to be tested or having predictive value, and so that characterizing the radiative adjustments and explaining the required solar constant reduction is presented as the main focus of the paper. For Equations 1 and 2, however, we have continued referring to "prediction", since it makes sense in the context of the initial guess for the solar constant reduction used by the modeling groups.

To me a more interesting question would be to look at differences between adjustments \*actually achieved by the models\* (as analyzed here) and the traditional notion of \*adjusted radiative forcings\* for which SSTs are held fixed. These will not be the same in this context, because even though the simulations feature near-zero surface warming, there are \*local\* SST changes almost everywhere, which surely have interesting consequences for atmospheric stability and cloud processes. There may be (probably are) "rapid adjustments" to solar forcing that are quite different than the eventual comprehensive adjustment of the models after allowing the SSTs to change. These could be evaluated by carrying out Hansen-style fixed SST experiments, even with a single model. The manuscript does not say much about the role of the flattened equator-to-pole temperature gradient on the radiative effects, which seems like a missed opportunity to learn more about the relevant physics.

Doing fixed-SST experiments of the response to solar forcing and the G1 scenario is a good idea, but outside the scope of this paper.

That said, I think the results themselves are interesting and sound, and they should be published after a slight reframing of the central questions. Keep the focus simply on answering why the required solar constant reduction is larger than expected.

My other substantial criticism is regarding timescales. Nowhere in this manuscript did I see any mention of the transient nature of the response. This seems important enough to merit some thought. As far as I've understood, these are coupled model simulations. The climate will continue to adjust long after 50 years, with implications for the spatial pattern of SSTs and consequent radiative feedback processes. The paper seems to treat the 50-year response as an equilibrium, which it surely is not. If I have misunderstood and these are actually slab ocean calculation, then the interpretation is more appropriate, but this should be clarified in the text.

These are fully coupled runs, but we don't see any reason to expect drift given previously published time series plots of the surface energy budget (Kravitz et al. 2013b, cited in the paper), and found none in time series plots of the APRP responses that are now included as Figure S13. We now discuss the time scale of averaging and the lack of drift in the first paragraph of Section 2.

Detailed issues:

- Page 2, Line 25: "One might intuitively expect...." This seems like a strawman argument. I would not expect this. Forcing and feedback are not the same thing. If others have suggested that these things should be correlated, then provide a citation here.

This argument was included because some people inside and outside our group (who will remain unnamed for privacy reasons) were surprised by the lack of a correlation in Figure 1a. However, on looking through the literature for previous comments on this issue, it appears that it has already been acknowledged that ECS should not affect the required amount of solar geoengineering in the case of no global mean temperature change, going back to Matthews and Caldeira (2007) who demonstrated this in more idealized simulations than those in GeoMIP. We now cite that paper in the manuscript, and have revised the discussion of the ECS vs. solar constant reduction scatter plot to focus on ruling out feedbacks as a cause of inter-model spread in the solar constant reduction, rather than disproving this theory. Also, to improve the flow of the manuscript given this change, we have flipped the order of the panels in Figure 1, and discuss the formula based on effective CO<sub>2</sub> forcing first.

- Page 5, line 1: A reference to Hansen et al. (2005) would be helpful for readers who need clarification about the various concepts of radiative forcing.

The suggested reference has been added.

- Page 5, line 11: It was not clear at first why the authors are referring to 50 years here. Later it becomes evident that that is the length of the GEOMIP simulations. That should be clarified.

We have moved the first reference to the 50 year time scale to the beginning of Section 2, when we explain the averaging period and the fact that the models were only run out for 50 years for G1.

- Page 5, line 20: "ant"

This typo has been corrected in the revised version.

- Figure 6: the results here are presented qualitatively. Why not compute a spatial correlation between EIS and low cloud changes?

This suggestion is beyond the scope of the paper. This type of analysis would be nontrivial, partly due to there being a number of possible confounding factors. For example, the climatological correlation between EIS and low clouds may vary between different locations based on local conditions.

- Page 13, first paragraph: This is a good discussion of cloud controlling factors.

Thanks. It is still in the paper.

- Page 13, bottom: I realize that these are more speculations than results per se, but I feel like this discussion confuses stocks vs. flows of water vapor. Reduced evaporation does not necessarily imply reduced boundary layer humidity.

While it is true that this linkage is not necessarily true in general, it makes more sense over land where moisture is limited than for the planet as a whole. The cited Cao *et al.* reference states: “This decrease in relative humidity is associated with the diminished source of water vapor to the atmosphere as a result of decreased canopy transpiration.”

- Page 17, line 14: I find it convoluted to describe the decreased OLR due to cooler temperatures to be "warming effect"

We now simply refer to OLR changes in this sentence.

- Page 17, line 19: I think these statements are inaccurate. The correction is not just for cloud masking of CO2 changes. A more important correction embedded in equation (5) is that differences in CRE depend on clear sky changes as well as cloud changes.

This sentence has been edited to clarify what is meant by cloud masking.

- Figure 10 and 11: I guess I'm not sure why these are presented as separate figures? The authors are quick to point out that figure 10 is misleading (page 21, line 15). Why not combine Figs. 10 and 11 and avoid potential confusion.

The choice of presenting Figures 10 and 11 separately allows for the results for the models that lacked to be presented in Figure 10, while consistently showing the same information across each panel of each figure. The black bars in Figure 10 are also relevant to the

- Page 23, line 5: This is the traditional "stratosphere adjusted" contribution to radiative forcing, e.g. Hansen et al. (2005)

This is now noted in the paper, with the suggested reference.

### Reviewer 3

The manuscript analyses results from experiment G1 under the model intercomparison on geoengineering (GeoMIP). Here, the solar constant is reduced so as to keep the top of the atmosphere radiative balance at zero when abruptly quadrupling the atmospheric CO2 concentration. The article discusses why the reduction in solar constant must be larger than what is predicted based on instantaneous and long-term effects of the CO2 increase alone and that rapid adjustments to the change in solar radiation must be taken into account. The manuscript is very well written and easy to follow, the authors present good graphics and tables to support their discussion and they use suited scientific methods in form of radiative kernels to decompose their radiative responses into rapid adjustments of different parts of the climate system. My only major objection is how the discussion is angled towards the potential use of their Equation 3, which to me is just a description of the radiative processes involved. The terms of this equation cannot be known before the experiment is run and it is therefore a bit misleading to suggest that it could be used to find a suited change in solar constant to counteract some positive forcing on the climate system. The equation does, however, support the results from the radiative kernels and should rather be used as a tool to test the validity of these results.

On the paper's framing and discussion of Equation 3, see response to Reviewer 2's first major comment.

## Specific comments

- P1, L21: “High cloud fraction increases..” Intuitively, this should also give a warming effect. You show later that this effect is not. I suggest to mention this here or to rewrite a bit. I was a bit puzzled why the increases in high clouds were not part of the following sentence on warming effects.

We now mention the small LW cloud adjustment in the abstract.

- P3, eq (2): Though obvious to most, perhaps you should state where this number comes from?

We now write  $S_0$  in the equation and list and explain the 1361 number in the text.

- P5, L8. “Existing tools. . .” A bit vague. Mention kernels already here.

We now mention APRP and radiative kernels at the first mention of existing analysis tools, and cite the relevant papers.

- P5, L10: “. . .and not “feedbacks”. . .”. This is true on a global scale, but is it true on a regional scale? You state that the surface temperature increase in the polar regions and Figure 7c shows a clear effect on solar radiation from surface albedo changes.

We now note that local temperature changes are responsible for many of these radiative adjustments. We have also changed “it is appropriate to refer to...” to “we refer to...” to acknowledge the possibility that others might choose to define adjustments and feedbacks differently.

- P5, L20: “. . .ant . . .”

This typo has been corrected in the revised version.

- P9, L18: “An increase in high cloud fraction would. . .” This is true and in this experiments, the temperature at these altitudes have decreased, which should enhance the effect further?

The enhancement of CRE by the lower temperatures for pre-existing clouds should be accounted for by the correction in Eq. 5, but for the new clouds this effect will show up in Figure 9. However, since the overall LW cloud adjustment in G1 is small, it does not seem worth it to mention this enhancing effect in the text.

- P9, L22: “. . .due to a reduction in LW emission from the cloud top” I am confused – how does something get warmer from receiving less radiation? Please clarify this sentence. Reduced high cloud cover will expose the region above to more surface radiation as this is now allowed to reach higher altitudes.

The physical argument is that the top of the cloud is being deprived of a radiative heat sink and therefore the region around the cloud top gets warmer. However, we recognize that this could be confusing and it is not important to the overall narrative, so we have taken this sentence out.

- P16, table 3: Can you not just put a minus sign in front of the solar forcing to avoid the +/- confusion?

We said early on that we were dropping the negative on the solar constant change, so we also do this for the solar forcings for internal consistency.

- P19,L1: \*. . .LW effect of the decrease in low cloud cover fraction compensates for this.” Is the temperature difference between the cloud top and the surface large enough to explain this? Or are you discussing surface warming here? Please clarify.

We meant the former, and have added a clarification here. The idea is that although the low clouds have a smaller temperature difference relative to the surface, the low cloud changes occur over a wide area. The effect of the surface temperature change is accounted for in the surface temperature kernel figure, and the masking of this effect by the pre-existing clouds is accounted for by the correction in Equation 5.

- Conclusions: I find the conclusion of the manuscript a bit wordy and I suggest trimming this section and making more about the results in this study rather than a speculation into future possible geoengineering challenges.

While the conclusions have been edited in response to other comments, we have not removed the speculation about future geoengineering challenges because we think the geoengineering research community will be interested in this discussion.

- P23, L17: Typo “This paper we explains..”

This typo has been corrected in the revised version.

- P25, L12: The PDRMIP experiments actually contains multimodel runs of both reduced solar constant and increased CO<sub>2</sub> and could therefor provide the data you need to look further into this.

According to Table 1 of the cited PDRMIP paper, they have a CO<sub>2</sub> doubling run but not a solar constant decrease run—only a solar constant increase. However, it turns out both abrupt solar increase and decrease experiments are included as part of CMIP6 (specifically the CFMIP component); a reference for this is now cited.

- P25, L21: “If solar geoengineering was attempting to actually cool the planet. . .” What? Back to preindustrial conditions?

See response to Reviewer 1’s comment on this sentence. We have added examples for possible goals of cooling.

# Changes in clouds and thermodynamics under solar geoengineering and implications for required solar reduction

Rick D. Russotto<sup>1</sup> and Thomas P. Ackerman<sup>1,2</sup>

<sup>1</sup>Department of Atmospheric Sciences, University of Washington, Seattle, Washington, USA

<sup>2</sup>Joint Institute for the Study of the Atmosphere and Ocean, University of Washington, Seattle, Washington, USA

*Correspondence to:* Rick D. Russotto (russotto@uw.edu)

## Abstract.

The amount of solar constant reduction required to offset the global warming from an increase in atmospheric CO<sub>2</sub> concentration is an interesting question with implications for assessing the feasibility of solar geoengineering scenarios and for improving our theoretical understanding of Earth's climate response to greenhouse gas and solar forcings. This study investigates this question by analyzing the results of 11 coupled atmosphere-ocean global climate models running Experiment G1 of the Geoengineering Model Intercomparison Project, in which CO<sub>2</sub> concentrations are abruptly quadrupled and the solar constant is simultaneously reduced by an amount tuned to maintain top of atmosphere energy balance and preindustrial global mean temperature. The required solar constant reduction in G1 is between 3.2% and 5.0%, depending on the model, and is uncorrelated with the models' equilibrium climate sensitivity, while a formula from the experiment specifications based on the models' effective CO<sub>2</sub> forcing and planetary albedo is well-correlated with but consistently underpredicts the required solar reduction. We propose an ~~alternative theory~~ explanation for the required solar reduction based on CO<sub>2</sub> instantaneous forcing and the sum of radiative adjustments to the combined CO<sub>2</sub> and solar forcings. We quantify these radiative adjustments in G1 using established methods and explore changes in atmospheric temperature, humidity and cloud fraction in order to understand the causes of these radiative adjustments.

The zonal mean temperature response in G1 exhibits cooling in the tropics and warming in high latitudes at the surface; greater cooling in the upper troposphere at all latitudes; and stratospheric cooling which is mainly due to the CO<sub>2</sub> increase. Tropospheric specific humidity decreases due to the temperature decrease, while stratospheric humidity may increase or decrease depending on the model's temperature change in the tropical tropopause layer. Low cloud fraction decreases in all models in G1, an effect that is robust and widespread across ocean and vegetated land areas. We attribute this to a reduction in boundary layer inversion strength over the ocean, and a reduction in the release of water from plants due to the increased CO<sub>2</sub>. High cloud fraction increases in the global mean in most models. The low cloud fraction reduction and atmospheric temperature decrease have strong warming effects on the planet, due to reduced reflection of shortwave radiation and reduced emission of longwave radiation, respectively. About 50% to 75% of the temperature effect is caused by the stratospheric cooling, while the reduction in atmospheric humidity results in increased outgoing longwave radiation that roughly offsets the tropospheric temperature effect. The LW effect of the cloud changes is small in the global mean, despite the increase in high cloud fraction. Taken together, the sum of the diagnosed radiative adjustments and the CO<sub>2</sub> instantaneous forcing ~~predicts~~ explains the re-

quired solar forcing in G1 to within about 6%. The cloud fraction response to the G1 experiment raises interesting questions about cloud rapid adjustments and feedbacks under solar versus greenhouse forcings, which would be best explored in a model intercomparison framework with a solar-forcing-only experiment.

## 1 Introduction

5 In light of the warming of Earth in response to anthropogenic greenhouse gas emissions (IPCC, 2013), and continued lack of progress in curbing those emissions (World Meteorological Organization, 2017), some (e.g. Crutzen, 2006) have argued for serious consideration of solar geoengineering, or reflecting sunlight to artificially cool the Earth, as a means of reducing harms from climate change. The Geoengineering Model Intercomparison Project (GeoMIP; Kravitz et al. (2011b)) was created to study the climate impacts of solar geoengineering schemes. GeoMIP consists of a set of standardized experiments for global  
10 climate models (GCMs) that include both an increase in  $\text{CO}_2$  and some compensating effect, such as a reduction in the solar constant or an increase in stratospheric aerosol concentration. In Experiment G1, the simplest of the GeoMIP experiments, the  $\text{CO}_2$  concentration is abruptly quadrupled relative to preindustrial levels, as in the abrupt4x $\text{CO}_2$  experiment from the Coupled Model Intercomparison Project, Phase 5 (CMIP5; Taylor et al. (2012)), and at the same time the solar constant is abruptly reduced by an amount tuned to maintain top of atmosphere (TOA) energy balance and therefore keep the global mean  
15 temperature approximately at preindustrial levels. Besides providing an important theoretical underpinning to the consideration of solar geoengineering scenarios, the G1 experiment is helpful for improving our fundamental understanding of how the climate responds differently to solar forcings, which operate in the shortwave (SW) part of the radiative spectrum, versus greenhouse gas forcings, which operate in the longwave (LW), and how linear the response is to combinations of SW and LW forcings. This can help us understand paleoclimates in which the sun was weaker (Feulner, 2012), attribution of climate change  
20 to anthropogenic as opposed to solar forcings (Santer et al., 2003), and the response of the climate to non-solar SW forcings such as aerosol forcings (Salzmann, 2016).

An interesting question related to G1 is ~~the~~ what amount of solar constant reduction  $|\Delta S_0|$  is required to compensate for the  $\text{CO}_2$  increase, ~~which has implications for the scale of the solar geoengineering intervention that would be required. This varies between about 3%-5% depending on the model (Table 1).~~ (For convenience, we hereafter drop the absolute value  
25 symbol and use  $\Delta S_0$  to refer to the solar constant reduction, keeping in mind that the sign of the change is always negative in this context.) ~~One might intuitively expect that  $\Delta S_0$  would be greater in models with greater equilibrium climate sensitivity (ECS), which is the amount of global mean temperature change that occurs after  $\text{CO}_2$  is doubled and the climate adjusts to restore top of atmosphere energy balance. However, a scatter plot of  $\Delta S_0$  versus ECS~~ This quantity varies between about 3%-5% depending on the model; the values for each model ~~(Figure 1a) shows that there is actually no correlation (correlation~~  
30 ~~coefficient  $r=0.02$ ) between these quantities. This makes sense if climate sensitivity is mainly determined by feedbacks on global mean temperature change, as has been found in CMIP5 models (Vial et al., 2013), since the feedbacks will, at least to a first order, work just as well to reverse a warming effect when an equal and opposite radiative forcing is applied.~~



**Table 1.** Models included in this study, with references, institutions, solar constant reduction in the G1 experiment ( $\Delta S_0$ ), and global mean surface air temperature change in G1 - piControl ( $\Delta T$ ). All have a full dynamical ocean coupled to the atmosphere.

| Model          | Reference               | Institution                                                                                                                                                                     | $\Delta S_0$ | $\Delta T$ (K) |
|----------------|-------------------------|---------------------------------------------------------------------------------------------------------------------------------------------------------------------------------|--------------|----------------|
| BNU-ESM        | Ji et al. (2014)        | Beijing Normal University                                                                                                                                                       | 4.4%         | 0.025          |
| CanESM-2       | Arora et al. (2011)     | Canadian Centre for Climate Modeling and Analysis                                                                                                                               | 4.0%         | -0.013         |
| CCSM4          | Gent et al. (2011)      | National Center for Atmospheric Research                                                                                                                                        | 4.1%         | 0.233          |
| CESM-CAM5.1-FV | Hurrell et al. (2013)   | National Center for Atmospheric Research                                                                                                                                        | 4.7%         | -0.157         |
| CSIRO-Mk3L-1-2 | Phipps et al. (2011)    | Commonwealth Scientific and Industrial Research Organization/<br>Bureau of Meteorology                                                                                          | 3.2%         | 0.034          |
| GISS-E2-R      | Schmidt et al. (2014)   | NASA Goddard Institute for Space Studies                                                                                                                                        | 4.5%         | -0.292         |
| HadGEM2-ES     | Collins et al. (2011)   | Met Office Hadley Centre                                                                                                                                                        | 3.9%         | 0.241          |
| IPSL-CM5A-LR   | Dufresne et al. (2013)  | Institut Pierre Simon Laplace                                                                                                                                                   | 3.5%         | 0.109          |
| MIROC-ESM      | Watanabe et al. (2011)  | Atmosphere and Ocean Research Institute (The University of Tokyo),<br>National Institute for Environmental Studies,<br>and Japan Agency for Marine-Earth Science and Technology | 5.0%         | -0.065         |
| MPI-ESM-LR     | Giorgetta et al. (2013) | Max Planck Institute for Meteorology                                                                                                                                            | 4.7%         | -0.011         |
| NorESM1        | Bentsen et al. (2013)   | Bjerknes Centre for Climate Research,<br>Norwegian Meteorological Institute                                                                                                     | 4.0%         | -0.044         |

For BNU-ESM, we are using a new realization, r3i1p1, that has a greater solar constant reduction and better compensates global mean temperature than the original. Two models that originally participated in G1, EC-Earth and HadCM3, are excluded from our analysis because many of the output fields necessary for this study were not available.

~~Percent solar constant reduction for models running the G1 experiment, versus (a) equilibrium climate sensitivity in the models, from Sherwood et al. (2014), and (b) solar constant reduction predicted by Equation 2, based on effective radiative forcing values from Sherwood et al. (2014) and planetary albedo values from Kravitz et al. (2013a). CESM-CAM5.1-FV and CSIRO-Mk3L-1-2 are excluded from this figure because these models were not included in Sherwood et al. (2014).~~

- 5 ~~A more accurate prediction of~~, which in every case achieved a global mean surface air temperature within 0.3 K of that in the ~~value~~ CMIP5 preindustrial control (piControl) experiment, are listed in Table 1. Because of its implications for the scale of the solar geoengineering intervention that would be required, it is important to understand what determines this quantity. We start our investigation of this question by plotting in Figure 1a the required values of  $\Delta S_0$  ~~in G1 is provided versus the values predicted~~ by a simple formula based on matching the reduction in outgoing LW radiation (OLR) from the  $\text{CO}_2$  increase with a
- 10 reduction in the absorbed SW radiation:

$$\Delta S_0 = 4 \times \frac{F_{4x\text{CO}_2, \text{eff}}}{1 - \alpha} \quad (1)$$

or, in percentage terms,

$$\Delta S_0(\%) = \left( 4 \times \frac{F_{4x\text{CO}_2, \text{eff}}}{1 - \alpha} \right) \times \frac{100\%}{1361 \text{ W m}^{-2}} \frac{100\%}{S_0} \quad (2)$$

where  $S_0$  is the solar constant (about  $1361 \text{ W m}^{-2}$ ),  $\alpha$  is the model's planetary albedo, and  $F_{4\times\text{CO}_2,\text{eff}}$  is the effective radiative forcing from a  $\text{CO}_2$  quadrupling and  $\alpha$  is the planetary albedo, with  $F_{4\times\text{CO}_2,\text{eff}}$  and  $\alpha$  both being model-dependent. This equation, calculated by regressing net TOA radiative flux against global mean temperature change in abrupt4xCO2 and taking the intercept (Gregory et al., 2004; Gregory and Webb, 2008). Figure 1a shows a strong correlation (correlation coefficient  $r = 0.86$ ) between the value of  $\Delta S_0$  predicted by Equation 2 and the value that actually achieved the experiment's objectives, indicating that  $\text{CO}_2$  forcing and planetary albedo determine  $\Delta S_0$  to a first order (primarily forcing, since it varies much more between models than albedo does). However, for every model, the actual  $\Delta S_0$  is greater than those predicted by this theory, as has been noted by Schmidt et al. (2012) for a subset of four models. This underprediction is relevant from a scenario modeling standpoint, since Equation 1 was used by the modeling groups to create an initial guess for  $\Delta S_0$ , later tuned using (Kravitz et al., 2011a; Schmidt et al., 2012). Obtaining the correct value required running successive 10-year GCM runs to obtain tuning runs of the GCMs until a net TOA radiation imbalance of less than  $0.1 \text{ W m}^{-2}$ . This achieved a global mean temperature within 0.3 K of that in the CMIP5 preindustrial control (piControl) experiment in all the models included in our study (Table 1). The technical specifications for G1 (Kravitz et al., 2011a) actually say to use the "steady state net radiation (TOA) difference" between abrupt4xCO2 and piControl as the radiative forcing in Equation 1, but this does not make sense because at steady state net TOA radiation is zero. Schmidt et al. (2012), describing the process for G1, state that effective radiative forcing, calculated by regressing net TOA radiative flux against was achieved.

One factor not accounted for by the initial guess formula is climate feedbacks. We can get a sense for how these might affect the required  $\Delta S_0$  by plotting it against equilibrium climate sensitivity (ECS), or the amount of global mean warming that occurs due to a doubling of  $\text{CO}_2$ , the inter-model spread in which is mainly determined by feedbacks (Vial et al., 2013). Figure 1b shows that there is no correlation (correlation coefficient  $r = 0.02$ ) between these quantities. This makes sense because feedbacks are defined based on global mean temperature changes, which are zero by design (and close to zero in practice) in GeoMIP, assuming the feedbacks will, at least to a first order, work just as well to reverse a warming effect when an equal and opposite radiative forcing is applied. These results from GeoMIP corroborate those of Matthews and Caldeira (2007), who found that the required geoengineering forcing is independent of climate sensitivity in experiments with an ocean GCM coupled to a single-layer atmosphere.

If neither radiative forcings nor feedbacks can fully explain the variation in the required  $\Delta S_0$ , then we must turn to radiative adjustments that do not depend on global mean temperature change in abrupt4xCO2 and taking the intercept (Gregory et al., 2004; Gregory, was used for the initial guess in Equation 1 changes. The effective radiative forcing  $\text{CO}_2$  radiative forcing in Equation 1 incorporates rapid adjustments of the atmosphere's temperature and humidity profiles, cloud properties, and surface albedo to the  $\text{CO}_2$  increase. However, such adjustments to the solar forcing are not accounted for. Effectively, but does not include temperature-dependent feedbacks. Strictly speaking, Equation 1 calculates the solar constant reduction that would balance the instantaneous  $\text{CO}_2$  increase if atmospheric properties were allowed to adjust to the  $\text{CO}_2$  increase but not to the solar constant reduction. Therefore, using it to predict The consistent underestimation of the required  $\Delta S_0$  amounts to assuming that the solar forcing does not cause its own rapid adjustments.

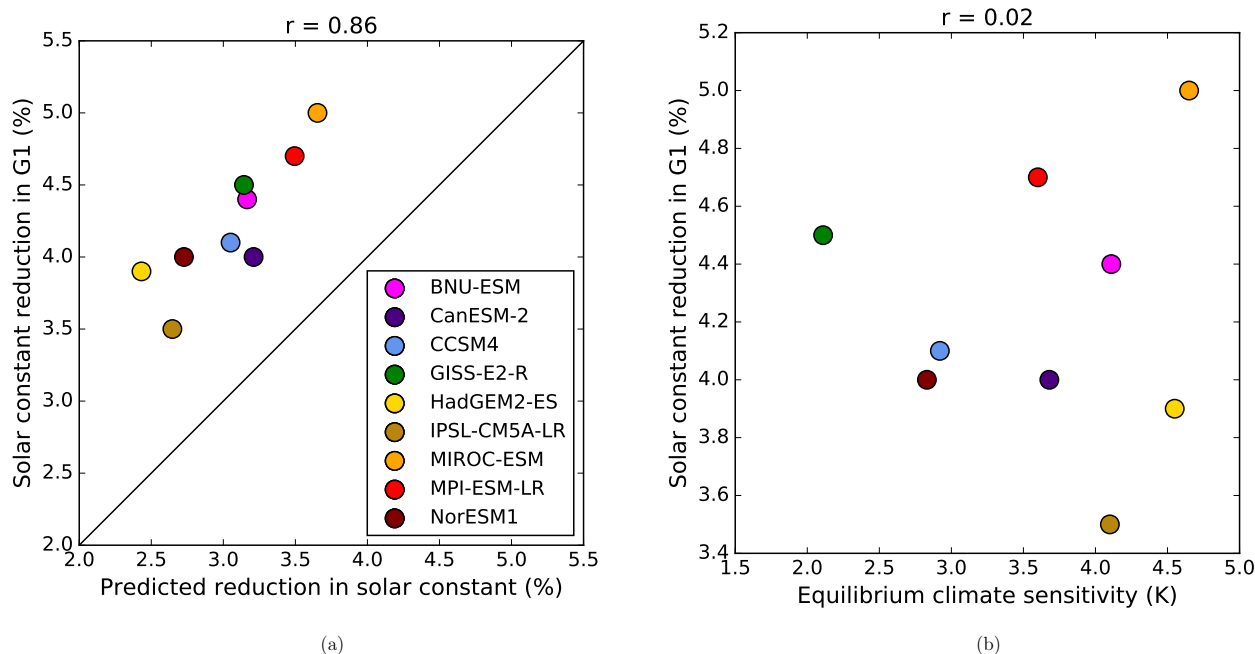

**Figure 1.** Percent solar constant reduction for models running the G1 experiment, versus (a) solar constant reduction predicted by Equation 2, based on effective radiative forcing values from Sherwood et al. (2014) and preindustrial planetary albedo values from Kravitz et al. (2013a), and (b) equilibrium climate sensitivity in the models, from Sherwood et al. (2014). CESM-CAM5.1-FV and CSIRO-Mk3L-1-2 are excluded from this figure because these models were not included in Sherwood et al. (2014).

Figure 1b compares the solar constant reduction predicted by Equation 1 to the reduction that actually achieved TOA energy balance under increased  $\text{CO}_2$  after tuning. The correlation,  $r = 0.86$ , is much better than for ECS, and indicates that  $\text{CO}_2$  forcing and planetary albedo determine  $\Delta S_0$  to a first order. However, for every model, the actual  $\Delta S_0$  is greater than the predicted value using Equation 1, as has been noted by Schmidt et al. (2012) for a subset of four models. This by Equation 1 indicates that atmospheric and surface adjustments in response to the combined  $\text{CO}_2$  and solar instantaneous forcings have a greater net warming effect on the climate than such adjustments to the  $\text{CO}_2$  forcing alone, requiring a greater reduction in the solar constant to restore the global mean temperature to preindustrial.

To resolve this discrepancy, we propose using the instantaneous radiative forcing from the While we cannot calculate rapid adjustments to the solar forcing alone without a set of model runs in which only the solar constant is changed, we can use the G1 output to calculate radiative adjustments to the combined  $\text{CO}_2$  increase, which is the change in OLR from the  $\text{CO}_2$  increase when all atmospheric and surface properties are held constant, and explicitly accounting for the rapid adjustments to and solar forcings, using existing analysis tools including the Approximate Partial Radiation Perturbation (APRP) method (Taylor et al., 2007) and radiative kernels (Soden et al., 2008; Shell et al., 2008). Assuming energy is conserved in the combined

~~CO<sub>2</sub> forcing and solar reduction~~models and the analysis methods are reasonable accurate, it should be possible to use these calculated radiative adjustments explain the required solar constant reduction in G1, as expressed in the following equation:

$$\Delta S_0 = 4 \times \frac{F_{4\times\text{CO}_2,\text{inst}} + \sum \Delta R_X}{1 - \alpha} \quad (3)$$

where  $F_{4\times\text{CO}_2,\text{inst}}$  is the instantaneous radiative forcing from the CO<sub>2</sub> quadrupling~~and  $\Delta R_X$  represents~~, which is the change in ~~net downward TOA radiation associated with adjustments of various OLR from the CO<sub>2</sub> increase when all atmospheric and surface physical properties  $X$  properties are held constant (Hansen et al., 2005), and  $\Delta R_X$  represents the global mean TOA radiative adjustments~~ to the combined forcings associated with various physical properties  $X$ , following the notation of Zhang and Huang (2014). ~~The various  $\Delta R_X$  can be calculated using existing tools developed for determining radiative adjustments and feedbacks.~~ Since there is no global mean temperature change in G1 by design (and approximately none in practice), ~~it is appropriate to continue to we~~ refer to the changes in TOA radiative balance resulting from changes in various physical properties of the atmosphere and surface as “adjustments” and not “feedbacks”~~even though the time scale is no longer rapid after 50 years. Kravitz et al. (2013b) plotted time series of changes in the components of the surface energy budget in G1 (their Figure 1) and found that the fluxes change little after the first year, so the time scale of the adjustment is not important for our purposes. Note, however, that the changes in TOA radiation are in many ways dependent on local surface temperature changes, as discussed later.~~

This study examines changes in atmospheric temperature, specific humidity, cloud fraction, and surface albedo in G1, and quantifies the radiative effects of these changes in order to ~~test the hypothesis that the solar constant reduction can be predicted using Equation 3 and understand why~~ understand what determines the required  $\Delta S_0$  and why it is greater than that predicted using effective CO<sub>2</sub> forcing. We also explore the physical reasons for the changes in atmospheric properties, particularly cloud properties, which have been found to strongly affect meridional energy transport changes in G1, with implications for regional temperature and precipitation responses (Russotto and Ackerman, 2018). The changes in atmospheric properties, including clouds, are plotted and discussed in Section 2. Section 3 quantifies the radiative effects of these surface ~~ant and~~ atmospheric adjustments to the G1 forcing. Section 4 examines the global means of these adjustments to see which are most important ~~and how well Equation 3 predicts the required solar forcing in G1~~ in determining the required  $\Delta S_0$  according to Equation 3. In Section 5 we summarize our results and discuss implications for future research on geoengineering and solar climate forcings.

## 2 Changes in the physical state of the atmosphere

To understand the physical basis for the radiative adjustments calculated in later sections, in this section we show changes in atmospheric temperature, specific humidity, and cloud fraction that occur in the G1 experiment relative to preindustrial conditions. Throughout the paper we show averages over 40 year time periods: years 11-50 of the G1 simulation, to avoid incorporating transient effects that occur in the first ten years into averages, and years 1-40 of the piControl simulation, except where otherwise noted. Averaging over years 11-50 is standard procedure for analysis of the GeoMIP experiments (e.g. Kravitz et al., 2013a); a longer averaging period would not be possible since most models stopped the experiment after

50 years. We treat the years 11-50 mean as equilibrium response, which seems appropriate since all components of the surface energy budget show little to no drift after the first 10 years (Kravitz et al., 2013b). We also plotted time series of the SW radiative adjustments calculated in Section 3 (Figure S13) and found no appreciable drift that would have extended beyond 50 years in any of the models.

5 Figure 2 shows the zonal mean temperature change for G1 minus piControl in each of the 11 models listed in Table 1. Several features common to all models are apparent. First, while the global mean surface air temperatures are all within 0.3 K of preindustrial (Table 1), all of the models exhibit surface cooling in the tropics and warming in the polar regions. This phenomenon has long been noted as a feature of climate model experiments with the G1 setup (e.g. Govindasamy et al., 2003; Kravitz et al., 2013a), and is due to the imposition of a net negative forcing in the tropics and a net positive forcing at the  
10 poles (Russotto and Ackerman, 2018). However, cooling dominates when considering the atmosphere as a whole. The tropical mid-to-upper troposphere cools more than the surface does, because the tropical temperature profile tends to follow a moist adiabat (e.g. Wetherald and Manabe, 1975), so that slight cooling at the surface leads to greater cooling aloft. The cooling of the tropical upper troposphere mirrors the effect that happens in global warming, where the upper troposphere warms more than the surface and emits more LW radiation, leading to a negative climate feedback known as the lapse rate feedback. In the  
15 case of G1, reduced LW emission from the atmospheric cooling has a warming effect on the planet; we quantify this effect using radiative kernels in Section 3.2.

Most models have an area of reduced cooling or even warming in the tropics near 100 hPa. This corresponds to the location of the tropical tropopause layer (TTL), an area in the tropics between about 70 and 150 hPa with properties of both the troposphere and stratosphere (Fueglistaler et al., 2009). The detailed vertical structure of temperature changes here may have  
20 to do with complex interactions between local temperature, humidity, and cloud properties. Another notable feature of the temperature change is the cooling of the stratosphere. An increase in carbon dioxide concentration cools the stratosphere, due to increased emission of LW radiation to space (Manabe and Wetherald, 1975), and a decrease in the solar constant also cools the stratosphere because it reduces the amount of ultraviolet radiation absorbed by ozone. The stratospheric cooling effect from the solar constant reduction is about an order of magnitude smaller than that from the CO<sub>2</sub> quadrupling (Govindasamy et al.,  
25 2003).

Figure 3 shows the change in the log of specific humidity between G1 and piControl in each model. We use a log scale because it makes it easier to visualize changes in specific humidity that occur over multiple orders of magnitude, and because log humidity changes are used in the water vapor radiative kernel calculations described in Section 3.2. Most of the troposphere becomes drier in G1 in all models, consistent with the large-scale cooling absent significant changes in relative humidity. Since  
30 water vapor is a strong greenhouse gas, this drying has a cooling effect on the planet, which we quantify in Section 3.2. Most models show moistening in the polar regions at low altitudes, consistent with the warming there, although the moistening is typically confined to smaller areas than the warming, indicative of a slight decrease in relative humidity at the poles (cf. Figure 5 of Smyth et al. (2017)). Interestingly, stratospheric water vapor decreases in most models, but it increases in the three models, BNU-ESM, CSIRO-Mk3L-1-2, and IPSL-CM5A-LR, that have warming in the TTL (albeit this moistening is mostly confined  
35 to the northern hemisphere in the IPSL model). This is consistent with stratospheric humidity being set by temperatures in the

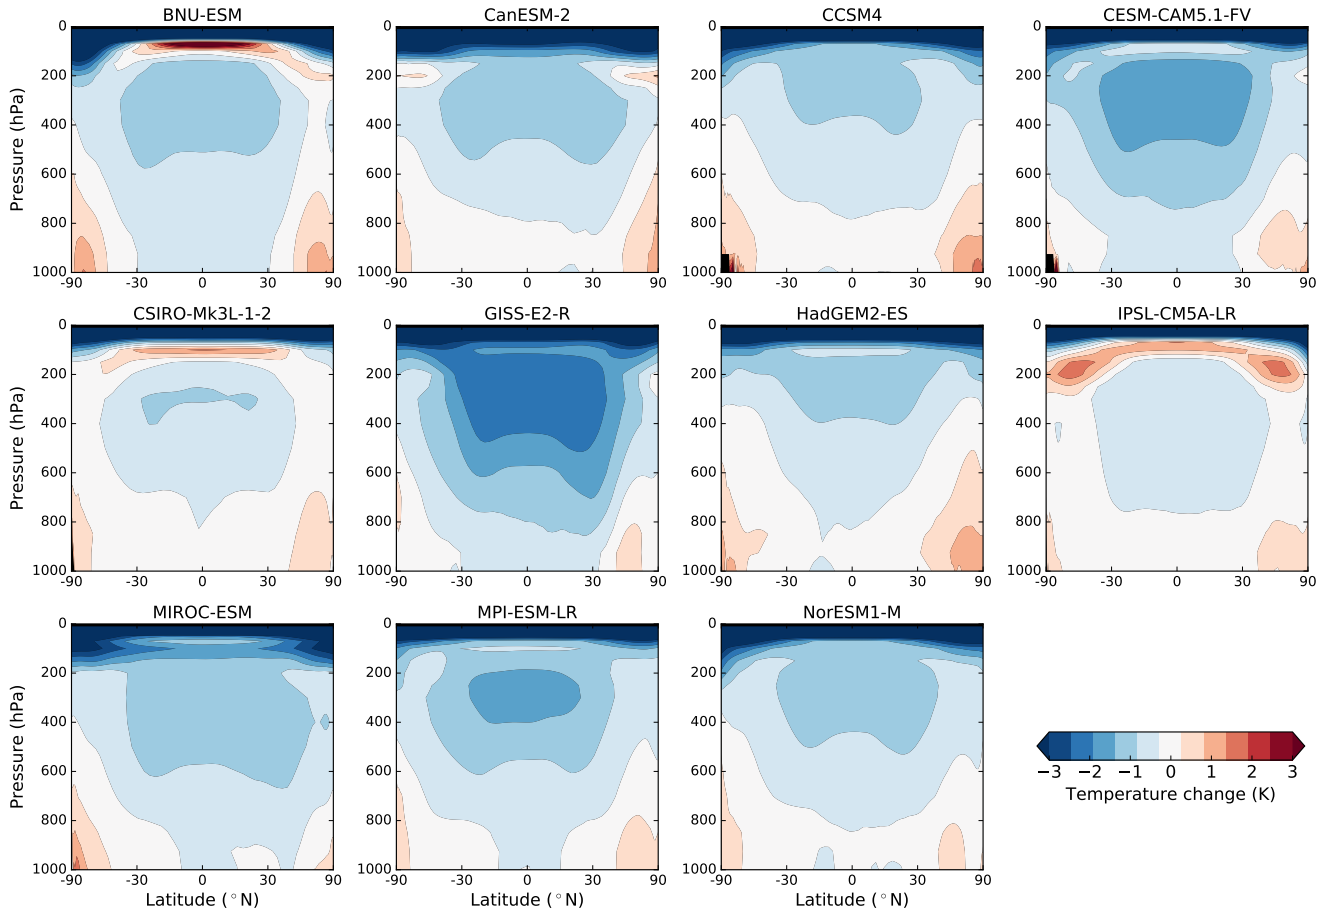

**Figure 2.** Zonal mean temperature change for G1 minus piControl in each model as a function of pressure.

TTL, through which air travels to reach the stratosphere as part of the Brewer-Dobson Circulation (e.g. Brewer, 1949; Newell and Gould-Stewart, 1981).

Figure 4 shows the zonal mean changes in cloud fraction in each of the models for G1 - piControl. Unlike atmospheric temperature and humidity, cloud fraction model output in CMIP5 and GeoMIP was archived on the native model vertical grid instead of a set of standardized pressure levels. Most of the GeoMIP models use hybrid sigma pressure coordinates, with the exceptions of GISS-E2-R, which uses pressure coordinates, and HadGEM2-ES, which uses hybrid sigma height coordinates. To enable direct comparisons with the temperature and humidity changes and radiative kernel calculations, we have regridded the cloud fraction output to the standard CMIP5 pressure levels, or to a fixed height grid for HadGEM2-ES. Conversion from hybrid sigma to pressure or height coordinates was done using a Python function (see "Code and data availability" below) based on the algorithm used in the "convert\_sigma\_to\_pres" Matlab function by Vimont, available at <http://www.aos.wisc.edu/~dvimont/matlab/>. Since surface pressure output (required for the hybrid sigma pressure regridding)

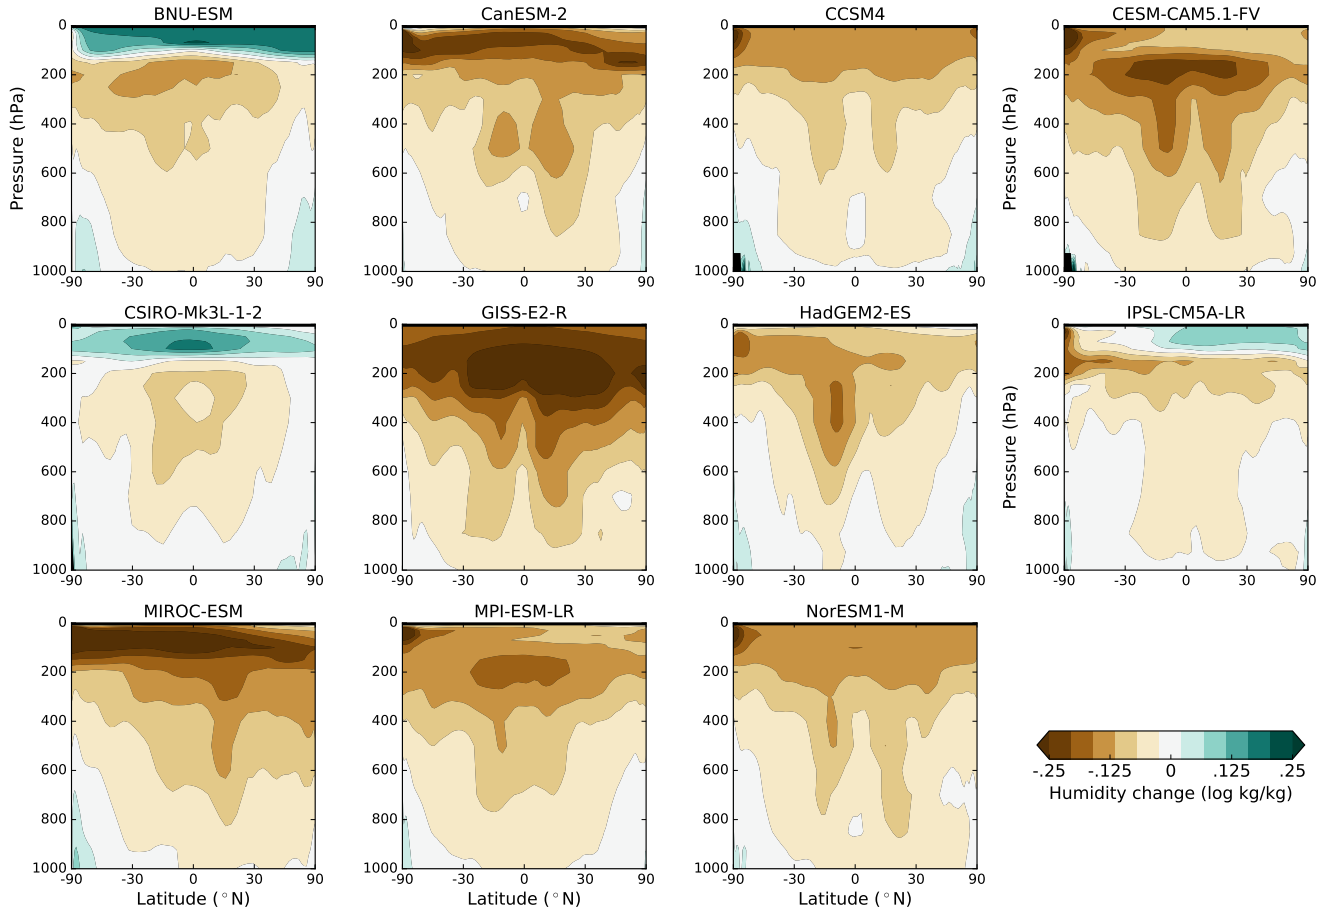

**Figure 3.** Zonal mean change in the natural log of specific humidity for G1 minus piControl in each model as a function of pressure.

was only available for the last 50 years of the piControl simulation for CSIRO-Mk3L-1-2, we have used the last 40 years of this simulation as the control case for cloud fraction for this model, instead of the first 40 years.

In their study of four models running G1, Schmidt et al. (2012) noted that all four had a reduction in low cloud fraction, while high clouds had an inconsistent change. Figure 4 shows that an overall reduction of low cloud fraction occurs in all 11 models included in this study. For high clouds, we also find an inconsistent response, but overall high cloud fraction increases in most models. Some models, especially those in which the TTL warms (Figure 2), have a decrease in high cloud fraction in the TTL, and two of them, CSIRO-Mk3L-1-2 and IPSL-CM5A-LR, have an overall decrease in high cloud fraction. Since low clouds primarily have a cooling effect on the climate due to their strong SW reflection, a reduction in low clouds would result in a warming effect that would partially ~~counteract~~offset the cooling from solar geoengineering. An increase in high cloud fraction would also be expected to have a warming effect on the planet by reducing LW emission to space, although other variables, such as cloud height, are more important to the LW effect of cloud changes in global warming simulations



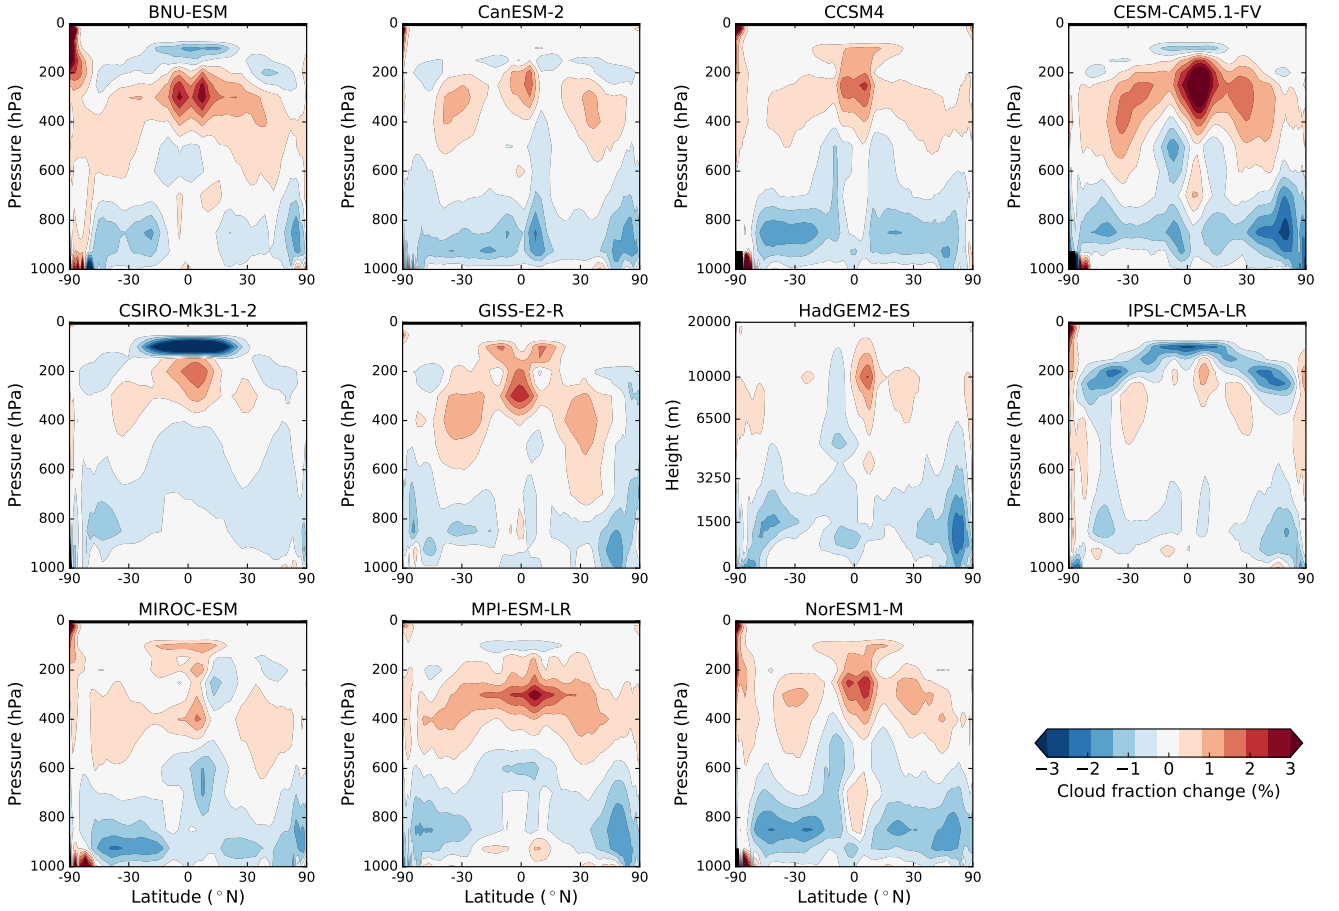

**Figure 4.** Zonal mean change in cloud fraction for G1 minus piControl in each model as a function of pressure, or height for HadGEM2-ES. To help comparisons with other models, the vertical axis for HadGEM2-ES is scaled according to  $e^{-z/8000 \text{ m}}$  (where  $z$  is height), which is approximately proportional to pressure.

(Zelinka et al., 2012b). ~~High-clouds-also-interact-with-local-temperature-and-humidity-profiles-in-complex-ways;-for-example;-the-reduced-high-cloud-fraction-in-the-IPSL-model-appears-to-warm-the-atmosphere-immediately-above,-due-to-a-reduction-in-LW-emission-from-the-cloud-tops.~~ We quantify the TOA SW and LW effects of the changes in cloud properties in Sections 3.1 and 3.2, respectively. In many models there is an increase in clouds in the stratosphere over Antarctica, likely due to the stratospheric cooling. Two models, HadGEM2-ES and MIROC-ESM, have a dipole in cloud fraction changes in the upper troposphere, corresponding to northward and southward shifts, respectively, of the intertropical convergence zone (ITCZ) in these models (Smyth et al., 2017; Russotto and Ackerman, 2018).

To get a sense of the zonally asymmetric spatial patterns of cloud fraction changes and to better understand areas of inter-model consensus and disagreement, we plot in Figure 5 maps of the multi-model mean changes in low, middle, and high cloud

**Table 2.** Global mean changes in low, middle and high cloud fraction in G1 minus piControl.

| Model                   | Cloud fraction change (%) |              |             |
|-------------------------|---------------------------|--------------|-------------|
|                         | low                       | middle       | high        |
| BNU-ESM                 | -0.60                     | 0.26         | 0.91        |
| CanESM-2                | -1.59                     | -0.14        | 0.69        |
| CCSM4                   | -1.54                     | -0.15        | 1.19        |
| CESM-CAM5.1-FV          | -1.51                     | 0.03         | 1.38        |
| CSIRO-Mk3L-1-2          | -0.71                     | -0.51        | -0.57       |
| GISS-E2-R               | -1.04                     | 0.13         | 1.34        |
| HadGEM2-ES              | -1.38                     | -0.19        | 0.44        |
| IPSL-CM5A-LR            | -0.74                     | 0.03         | -1.12       |
| MIROC-ESM               | -1.60                     | -0.02        | 0.76        |
| MPI-ESM-LR              | -1.03                     | -0.05        | 1.31        |
| NorESM1                 | -1.63                     | -0.22        | 1.12        |
| <u>Multi-Model Mean</u> | <u>-1.22</u>              | <u>-0.08</u> | <u>0.68</u> |

fraction for G1 - piControl. Within the ranges for low, middle, and high clouds, we assume random overlap between adjacent layers of the common pressure grid. We use 680 hPa as the boundary between low and middle clouds and 440 hPa as the boundary between middle and high clouds, following the standards for the International Satellite Cloud Climatology Project (ISCCP; see Figure 2 of Rossow and Schiffer (1999)), or 3250 m and 6500 m in the case of HadGEM2-ES, which roughly correspond to these pressure levels in the 1976 Standard Atmosphere (NOAA, 1976). These plots, and all subsequent multi-model mean maps, show stippling where fewer than all but 2 of the included models agree on the sign of the change, so that unstippled areas indicate robust changes. Since this agreement could happen by chance in isolated areas, we focus on areas with apparent spatial structure or a physical reason why we might expect a change. For all multi-model mean maps, corresponding maps for each of the individual models are available in the Supplemental Information. Global mean cloud fraction changes for the individual models are shown in Table 2.

The reduction in low cloud fraction (Figure 5a) is widespread, occurring over most ocean areas except for regions close to the equator and poles, and over most non-desert land areas. Middle clouds (Figure 5b) have fewer areas with robust changes, but there is a reduction in the cloud fraction on either side of the equator over the Atlantic and Pacific and over the equatorial Indian ocean. This may be related to a narrowing of the annual mean tropical precipitation maximum (see Fig. 5 of Tilmes et al., 2013), which may be due in part to a reduction in the seasonal migration of the ITCZ (Smyth et al., 2017). For high clouds (Figure 5c), there are few areas with robust changes, but there is a notable increase in high clouds over the equator, in some subtropical regions (around 30° N and S), and over the poles, particularly Antarctica. Figure 4 shows that the high cloud increases over the poles are mostly in the stratosphere.

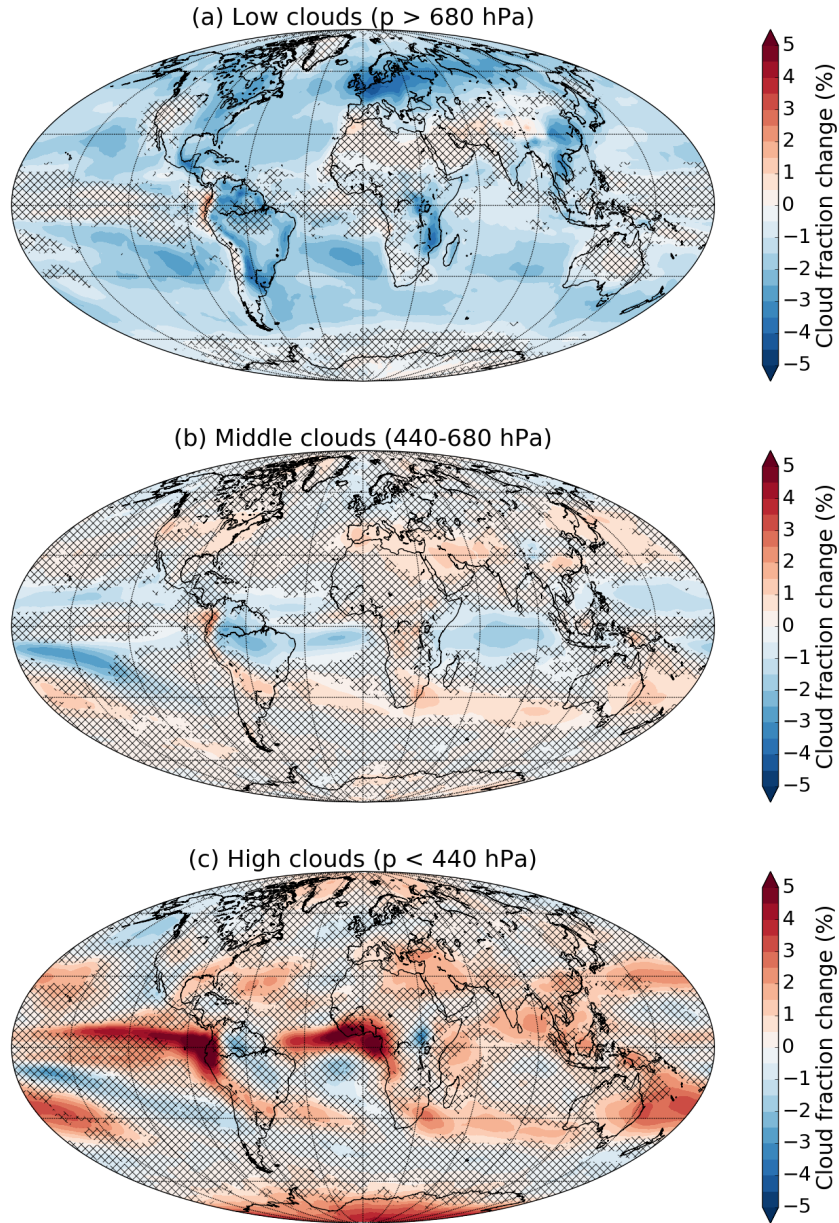

**Figure 5.** Multi-model mean changes in low (a), middle (b) and high (c) cloud fraction for G1 - piControl. Hatching indicates areas where fewer than 9 of the 11 models agree on the sign of the change.

Without additional experiments varying potential drivers of cloud changes, it is difficult to prove definitively the causes for the changes in cloud fraction. However, it is possible to gain some insight into the reasons for changes in low cloud

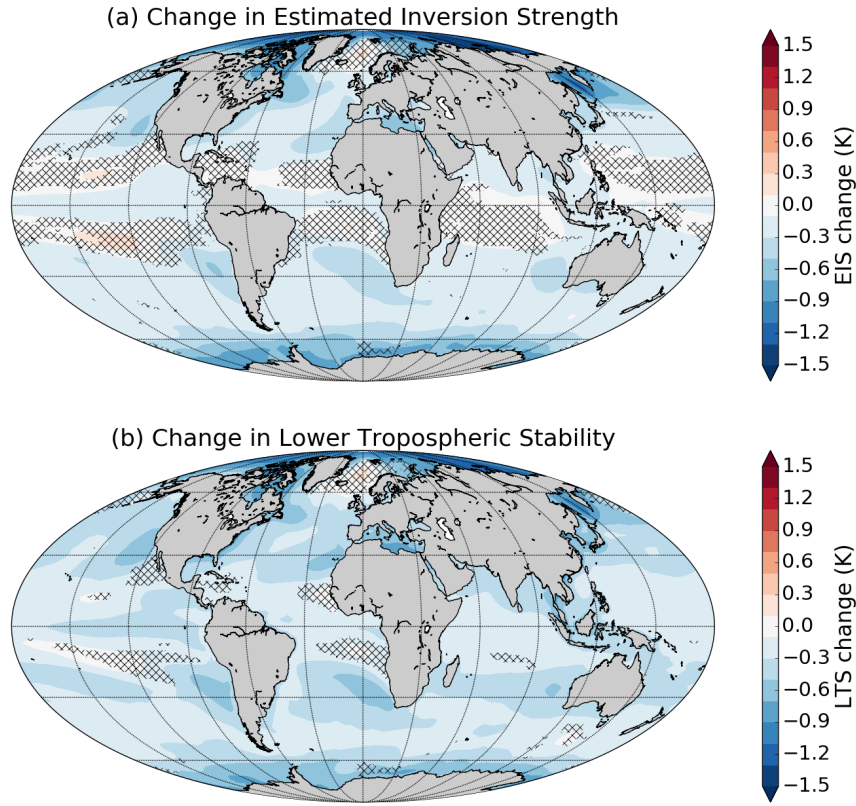

**Figure 6.** Multi-model mean changes in EIS (a) and LTS (b) for G1 - piControl. Hatching indicates areas where fewer than 7 of 9 models agree on the sign of the change. CSIRO-Mk3L-1-2 and MPI-ESM-LR models are excluded from this plot because near-surface specific humidity output, which is required to calculate EIS, was not available.

fraction over the ocean by plotting several variables that are correlated with low cloud fraction in observations. These include lower-tropospheric stability (LTS), defined as the difference in potential temperature between 700 hPa and the surface (Klein and Hartmann, 1993), and estimated inversion strength (EIS), a metric of the temperature inversion at the top of the marine boundary layer. EIS is defined as (Wood and Bretherton, 2006, Eq. 4):

$$5 \quad \text{EIS} = \text{LTS} - \Gamma_m^{850} (z_{700} - \text{LCL}) \quad (4)$$

where  $\Gamma_m^{850}$  is the moist adiabatic lapse rate at 850 hPa,  $z_{700}$  is the height of the 700 hPa surface, and LCL is the lifting condensation level.

Figure 6 shows the changes in EIS (a) and LTS (b) for G1 - piControl. Both of these quantities generally decrease across most of the ocean, except for some regions centered near 15° N and S. The reduction in EIS is generally smaller than the reduction in LTS (due to the correction for the moist adiabatic temperature profile), but is still widespread. A reduction of

the strength of the inversion at the top of the boundary layer would be expected to reduce low cloud fraction by encouraging mixing of dry air into the boundary layer, so the reduction in EIS over the ocean is a likely explanation for the reduction in low cloud fraction there. Stability metrics are included in low cloud fraction schemes in many models, and those that use the Slingo (1987) scheme, such as CCSM4 and NorESM1-M, have an explicit dependence of low cloud fraction on stability. However, 5 the robustness of the reduction in low cloud fraction in G1 indicates that it is not the result of the idiosyncrasies of any one cloud fraction scheme.

Besides changes in stability metrics, other factors that have been suggested as explaining changes in marine stratocumulus cloud fraction under global warming conditions in large-eddy simulation models include reduced LW radiative cooling from cloud tops due to increased CO<sub>2</sub> and H<sub>2</sub>O concentrations; decreased subsidence above the boundary layer; and increased sea 10 surface temperatures (Bretherton, 2015). Qu et al. (2014) analyzed changes in marine stratiform cloud fraction in CMIP3 and CMIP5 global warming experiments, and found a reduced low cloud fraction in most models, which they attributed to an increase in sea surface temperature (SST). While EIS increased in the global warming experiments, which would promote increased cloud fraction, this was not enough to compensate for the SST increase ~~in the global warming scenarios~~. In G1, SST changes little (and in fact decreases slightly in the tropics and subtropics (Hong et al., 2017, Fig. 1)), leaving EIS to dominate 15 changes in low cloud fraction over the ocean.

It does not appear that cloud top radiation or subsidence could be responsible for the widespread low cloud reduction, for the following reasons. The mechanism of reduced LW radiative cooling from cloud tops would be much weaker for G1 than for global warming if at all present because, while CO<sub>2</sub> concentrations have increased, water vapor concentrations have decreased; also, the reduction in insolation further reduces the net radiative cooling rate via its direct SW effect. We have not tried to 20 quantify how these fluxes have changed in G1 since LW radiative fluxes at the top of the boundary layer were not included in the GeoMIP model output archive. ~~Meridional~~ We might expect that subsidence would change due to the effects of the combined CO<sub>2</sub> and solar forcings on the atmospheric radiative cooling profile. However, meridional stream function anomaly plots for G1 minus piControl (Smyth et al., 2017; Guo et al., 2018) show that while some areas have anomalous subsidence, others have anomalous rising motion, and these regions are not consistent between models ~~–or with the regions of low cloud~~ 25 fraction decrease. Large-eddy simulation experiments involving a CO<sub>2</sub> increase and insolation reduction could help better understand what role, if any, these processes play in the changes in low cloud fraction in the G1 scenario, as well as the role of any changes in boundary layer or free troposphere relative humidity not associated with any of the processes discussed here.

Qu et al. (2014) attribute the increase in EIS in global warming experiments to greater surface warming over the continents and the tropical western Pacific warm pool relative to the rest of the ocean; the warmed air is then advected over the tops of the 30 marine stratocumulus fields. However, a reverse version of this mechanism does not seem to be at work in G1 because cooling is more robust over the ocean than over land (Kravitz et al., 2013a, Figure 2). It is also important to keep in mind that there are different metrics of stability that are useful for different parts of the atmosphere and for different types of clouds. Kravitz et al. (2013b) argued that any cloud cover changes in G1 would be due in part to increases in atmospheric stability, but in our study it appears to be a decrease in stability that is most relevant to the low cloud reduction. Another metric of stability, the rate of 35 increase of equivalent potential temperature  $\theta_e$  with height, does in fact increase in G1 relative to piControl, as shown in Figure



8 of Kravitz et al. (2013a). So, even as the atmosphere has gotten less stable in G1 with respect to boundary layer turbulence, it has gotten more stable with respect to deep convection, at least to the extent to which  $\frac{\partial \theta_e}{\partial z}$  is a predictor of changes in deep convection, as assumed by Kravitz et al. (2013a). To better understand the reasons for the changes in clouds, it would be useful to further investigate the effects of CO<sub>2</sub> and solar forcings on potential and equivalent potential temperature profiles.

5 Over land, existing research suggests that the reduction in low cloud fraction in G1 is a result of the physiological responses of plants to increased CO<sub>2</sub>, as represented in the models' dynamic vegetation schemes. Cao et al. (2010) ran GCM simulations in which the CO<sub>2</sub> concentrations experienced by plants were doubled while the radiative fluxes were held constant, and found that low cloud fraction decreased in many vegetated land areas (see their Figure 1, central panel). The low cloud fraction decrease in the Cao et al. study is strongest in South America, eastern North America, southeast Asia, southeast Africa, and  
10 western Europe, which are the same areas of reduced low cloud cover in G1. The mechanism is that, when CO<sub>2</sub> concentrations are higher, plants' stomata do not need to open as much to take in the same amount of CO<sub>2</sub>, leading to less transpiration of water from the plants (Field et al., 1995). This causes a reduction in near-surface relative humidity over land, seen in both Cao et al. (2010, Figure 2) and G1 (Smyth et al., 2017, Figure 5), which reduces the cloud fraction. In addition to plant physiology, it is possible that some of the reduction in relative humidity and cloud fraction over land in G1 is due to a reduction in evaporation  
15 directly caused by the reduction in surface SW radiation. The balance between these two quantities explains the reduction in global mean precipitation in G1 (Kravitz et al., 2013b), since precipitation must balance evaporation, suggesting that a similar mechanism may affect cloud fraction. Over the ocean, however, near-surface relative humidity increases in G1 in most areas, despite the reduction in evaporation (Smyth et al., 2017), implying that evaporation changes are not the reason for the low cloud changes there.

## 20 3 Radiative effects

### 3.1 SW radiative effects

To calculate the SW radiative effects of changes in clouds and other atmospheric and surface properties, we use the ~~approximate partial radiation perturbation (APRP)~~ APRP method introduced by Taylor et al. (2007), which is based on a single-layer radiative transfer model of the atmosphere that can be expressed analytically and requires as inputs only the monthly mean  
25 surface and TOA radiative fluxes and total column cloud fraction outputs from the GCMs. APRP shows the radiative effects of physical changes in clouds, accounting for cloud masking effects, in which the differences between clear-sky and all-sky fluxes change in response to forcing without changes in the clouds themselves. The calculations shown here have previously been used as inputs to energy balance model simulations to understand the effects of changes in clouds and surface albedo on atmospheric energy transport in G1 (Russotto and Ackerman, 2018).

30 Figure 7 shows the multi-model mean change in net downward SW radiative flux at the TOA due to changes in clouds (Figure 7a), non-cloud atmospheric scattering and absorption (Figure 7b), and surface albedo (Figure 7c), calculated using APRP. Global mean radiative adjustments for the individual models in the SW and LW are shown in Table 3, which will be referred to in the discussion of the required solar forcing in G1 in Section 4. Clouds generally have a robust and widespread

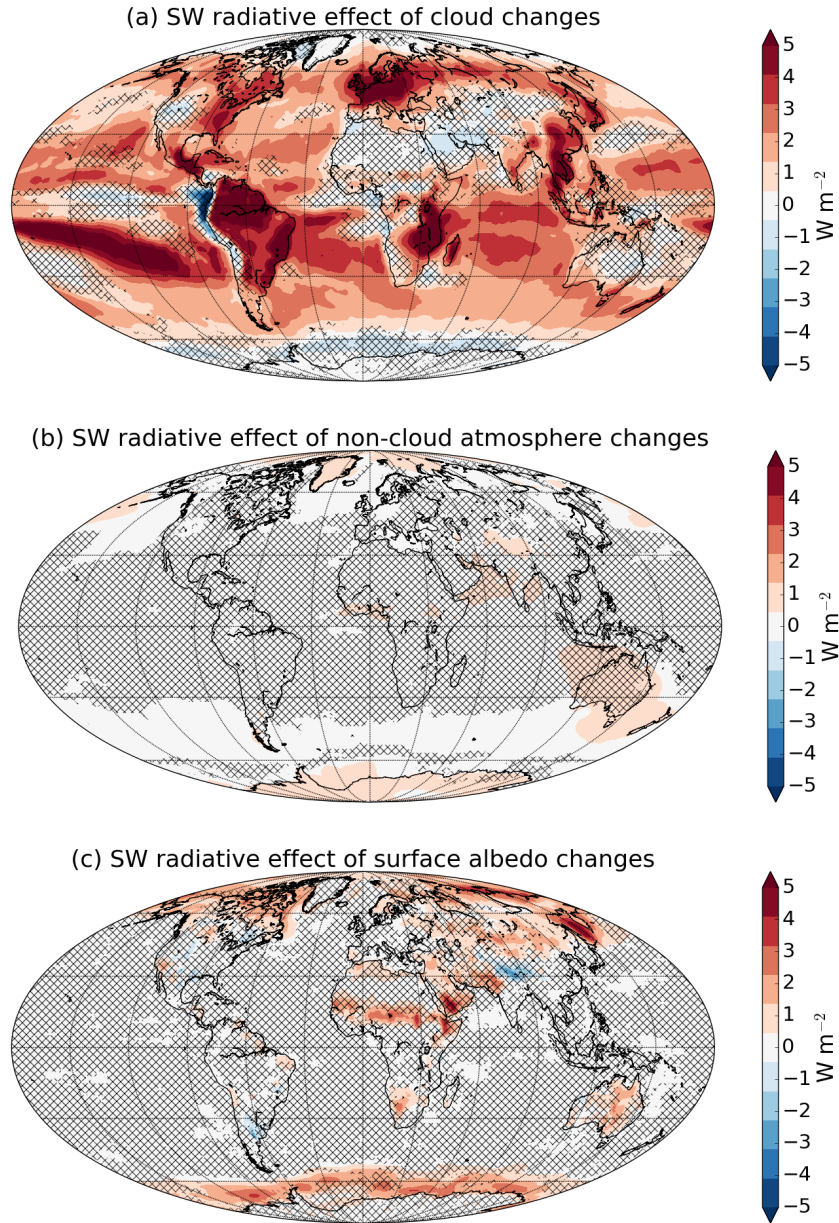

**Figure 7.** Multi-model mean change in net downward SW radiation at the TOA in G1 - piControl due to changes in cloud properties (a), non-cloud atmospheric absorption and scattering (b), and surface albedo (c), calculated using APRP method (Taylor et al., 2007). Hatching indicates areas where fewer than 7 of 9 models agree on the sign of the change. CSIRO-Mk3L-1-2 and GISS-E2-R models are excluded because not all fields necessary for APRP were correctly archived.



**Table 3.** Global mean radiative adjustments in G1 minus piControl, and excess and total solar forcing in G1, in  $\text{W m}^{-2}$ . Positive values indicate a warming effect (increase in absorbed SW radiation or decrease in OLR), except for solar forcing where positive values represent a cooling. SW adjustments correspond to multi-model means plotted in Figure 7. LW adjustments correspond to multi-model means plotted in Figures 8 and 9, with sign flipped for Figure 8. “Sum” is the sum of all the SW and LW adjustments.  $F_{\text{excess}}$  is calculated using Equation 6 and represents the actual instantaneous solar forcing ( $F_{\text{solar}}$ ) in G1 minus that ~~predicted-based-on-which would match the~~  $\text{CO}_2$  effective or instantaneous forcing.  $F_{\text{solar}}$  represents the total instantaneous solar forcing calculated from theory (Equation 8) or actually used in G1 (Equation 9).

| Model                   | SW adjustments |             |             | LW adjustments |             |                      |              | Sum         | $F_{\text{excess}}$ |             | $F_{\text{solar}}$ |              |
|-------------------------|----------------|-------------|-------------|----------------|-------------|----------------------|--------------|-------------|---------------------|-------------|--------------------|--------------|
|                         | cloud          | non-cloud   | surface     | $T_a$          | $T_s$       | $\text{H}_2\text{O}$ | cloud        |             | Eff.                | Inst.       | theory             | actual       |
| BNU-ESM                 | 1.36           | 0.05        | 0.51        | 2.94           | 0.08        | -0.78                | -0.08        | 4.08        | 2.95                | —           | —                  | 10.51        |
| CanESM-2                | 1.44           | 0.41        | -0.04       | 3.03           | 0.07        | -1.04                | -0.26        | 3.60        | 1.90                | 4.00        | 9.20               | 9.60         |
| CCSM4                   | 2.09           | -0.05       | 0.28        | 2.53           | -0.08       | -0.84                | 0.13         | 4.05        | 2.55                | 4.44        | 9.56               | 9.95         |
| CESM-CAM5.1-FV          | 0.71           | -0.09       | 0.87        | 3.94           | 0.18        | -1.39                | 0.30         | 4.52        | —                   | —           | —                  | 11.26        |
| CSIRO-Mk3L-1-2          | —              | —           | —           | 2.16           | 0.03        | -0.52                | -0.24        | —           | —                   | —           | —                  | —            |
| GISS-E2-R               | —              | —           | —           | 4.88           | 0.21        | -1.78                | -0.07        | —           | —                   | —           | —                  | 10.79        |
| HadGEM2-ES              | 1.05           | 1.07        | 0.50        | 2.66           | -0.05       | -0.87                | -0.15        | 4.21        | 3.56                | 3.91        | 9.76               | 9.46         |
| IPSL-CM5A-LR            | 1.32           | 1.21        | 0.15        | 2.08           | -0.05       | -0.52                | -0.86        | 3.35        | 2.01                | 3.85        | 7.75               | 8.25         |
| MIROC-ESM               | 3.29           | 0.06        | 0.02        | 3.44           | 0.10        | -1.11                | -0.58        | 5.22        | 3.15                | —           | —                  | 11.69        |
| MPI-ESM-LR              | 2.63           | -0.00       | 0.17        | 3.41           | 0.07        | -1.10                | -0.54        | 4.63        | 2.86                | —           | —                  | 11.16        |
| NorESM1                 | 2.07           | -0.20       | 0.05        | 2.88           | 0.08        | -0.97                | -0.10        | 3.82        | 3.00                | 3.87        | 9.34               | 9.42         |
| <u>Multi-Model Mean</u> | <u>1.77</u>    | <u>0.27</u> | <u>0.28</u> | <u>3.09</u>    | <u>0.06</u> | <u>-0.99</u>         | <u>-0.22</u> | <u>4.16</u> | <u>2.75</u>         | <u>4.01</u> | <u>9.12</u>        | <u>10.21</u> |

warming effect in the SW, in locations that closely correspond to the areas of reduced low cloud fraction shown in Figure 5a. The non-cloud atmosphere effects are very weak by comparison in the multi-model mean, but there are several models with appreciable positive values for this adjustment. Maps of this adjustment for the individual models (Figure S7) show that for HadGEM2-ES, it appears to be related to a reduction in atmospheric dust, since most of the warming effect occurs over and downwind of deserts; in IPSL-CM5A-LR, the effect is relatively spatially uniform but slightly stronger in higher latitudes. For surface albedo, there are warming effects in high latitudes from decreases in sea ice and snow cover associated with the residual polar warming in G1. There are also some warming effects in lower latitudes near desert regions, such as in the Sahel region; this may have to do with vegetation effects. There are several small regions, such as Tibet, with increases in surface albedo, presumably due to increased snow cover as a result of surface cooling there (*cf.* Figure 2 of Kravitz et al. (2013a)). Surface albedo effects are strong in some locations, such as the Sea of Okhotsk, but the relatively small area over which surface albedo changes can occur limits their importance in the global mean.

### 3.2 LW radiative effects

The technique of radiative kernels (Held and Soden, 2006; Soden et al., 2008; Shell et al., 2008) was developed to quantify LW radiative adjustments and feedbacks using standard monthly mean climate model output. These kernels consist of matrices of the partial derivatives of OLR with respect to changes in surface temperature, atmospheric temperature, specific humidity, and greenhouse gas concentration as a function of latitude, longitude, month and (where applicable) pressure, calculated using offline calculations with a particular GCM's radiative transfer code. Radiative kernels have been developed based on a variety of GCMs, including GFDL AM2 (Soden et al., 2008), CAM3 (Shell et al., 2008), MPI-ESM-LR (Block and Mauritsen, 2013), and CESM-CAM5 (Pendergrass et al., 2018).

We have applied the Shell et al. (2008) radiative kernels to the G1 ensemble. The choice of model used to generate the kernels has been shown to have little effect on the results (Soden et al., 2008). After regridding the kernels to the latitude and longitude grid of each GCM, we multiplied them by the changes in temperature and the log of specific humidity, normalized by the standard anomaly used to compute the kernels (1 K for the surface and atmospheric temperature kernels, and the change in log specific humidity associated with a 1 K warming at constant relative humidity for the water vapor kernel), in order to compute the change in OLR associated with the changes in each of these quantities for G1 - piControl. We summed the OLR changes from each vertical level in order to get overall radiative adjustments from column temperature and water vapor changes, and we used the annual mean of the monthly results for our analysis.

Figure 8 shows multi-model mean changes in OLR for G1 - piControl calculated from the atmospheric temperature (a), surface temperature (b), and water vapor (c) kernels. Global means for the individual models are shown in Table 3. For the atmospheric temperature kernel, there is a strong decrease in OLR that is widespread across the globe and robust across models. This is associated with the cooling of the atmosphere and reduced longwave emission (*cf.* Figure 2). The reduction in OLR is stronger in the tropics than in the polar regions, and is due to some combination of upper tropospheric and stratospheric cooling. We discuss the contribution of the stratospheric component in the next section. Surface temperature changes have little effect on the TOA LW radiation balance, but there is a reduction in OLR in the tropics and subtropics and an increase in the polar regions that is consistent across models, due to the patterns of tropical cooling and polar warming at the surface. The OLR change from the surface temperature kernel is much smaller than that for atmospheric temperature because the atmosphere is not very transparent to LW radiation in most wavelengths, and because temperature changes are smaller at the surface than in the upper troposphere and stratosphere. Changes in water vapor concentration cause a robust ~~cooling-effect~~ (increase in OLR) that partially offsets the ~~warming-effect~~ decrease in OLR from the atmospheric temperature kernel. The water vapor concentration decreases in the upper troposphere (Figure 3), which increases LW emission to space by lowering the effective altitude of emission.

In addition to the quantities plotted in Figure 8, radiative kernels can also be used to calculate the effect of changes in cloud properties on OLR. This is often measured according to the change in the cloud radiative effect (CRE), which is the difference in OLR in clear-sky minus all-sky averages. However, changes in the cloud radiative effect may include cloud masking effects. We can correct the change in LW CRE for ~~cloud-masking~~ the effects of existing clouds on clear-sky fluxes using the difference

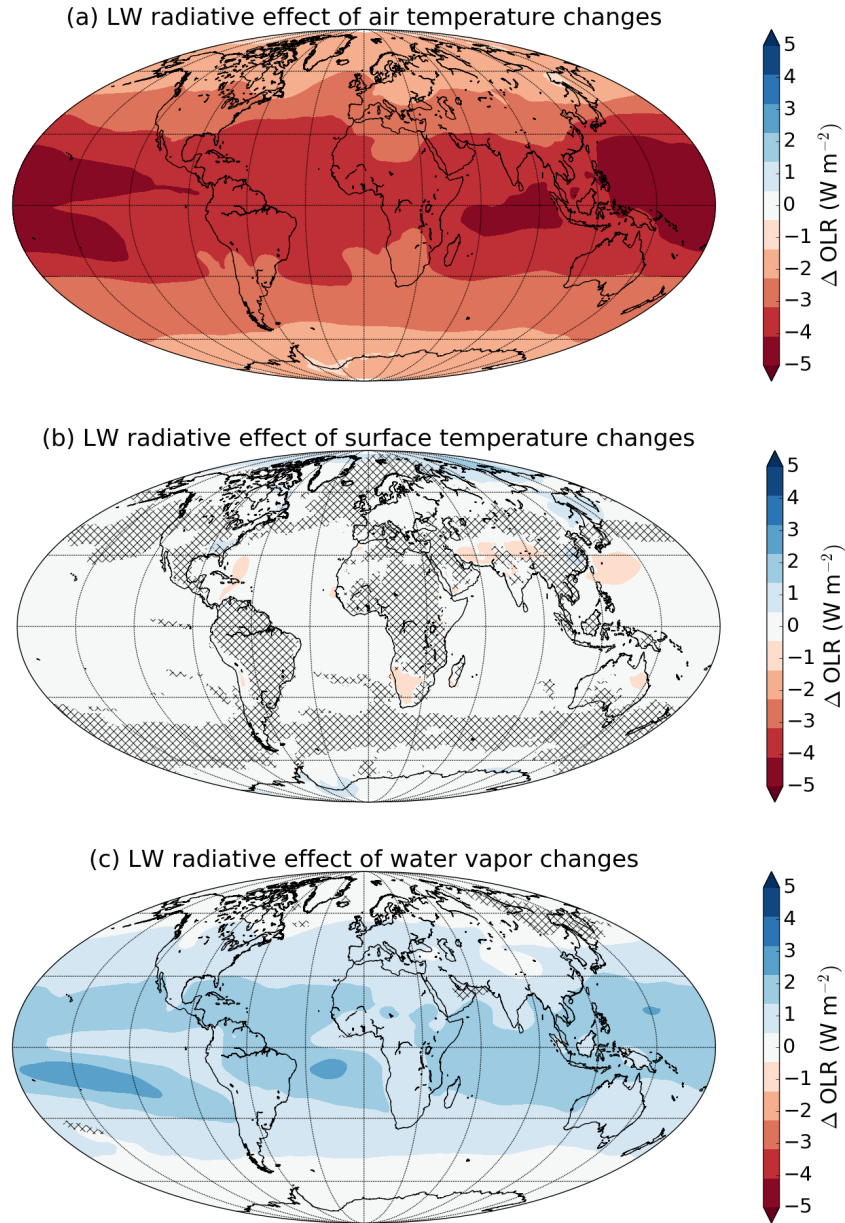

**Figure 8.** Multi-model mean change in OLR in G1 - piControl due to changes in atmospheric temperature (a), surface temperature (b), and specific humidity (c), calculated using radiative kernels (Shell et al., 2008). Hatching indicates areas where fewer than 9 of 11 models agree on the sign of the change.

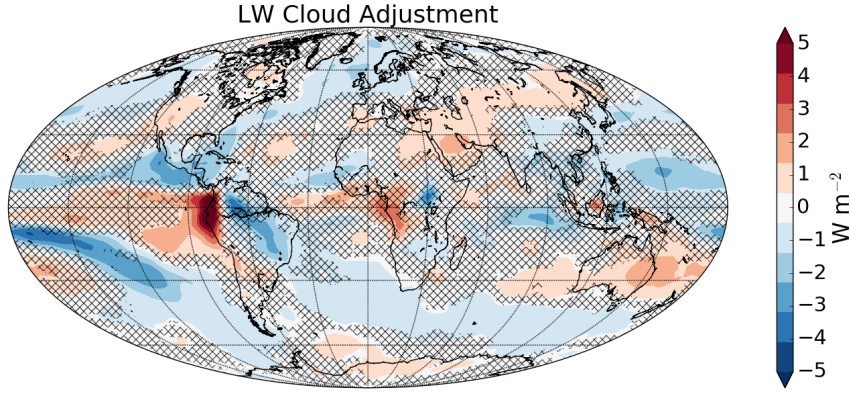

**Figure 9.** Multi-model mean change in LW cloud radiative effect in G1 - piControl, corrected for cloud masking of LW air temperature, surface temperature and water vapor adjustments and CO<sub>2</sub> forcing. Positive values indicate a decrease in OLR, *i.e.* a warming effect. Hatching indicates areas where fewer than 9 of 11 models agree on the sign of the change.

in flux changes calculated according to clear-sky and all-sky kernels, following Shell et al. (2008):

$$\begin{aligned} \Delta \text{LWCRE}_{\text{adjusted}} = & \text{LWCRE}_{\text{G1}} - \text{LWCRE}_{\text{piControl}} \\ & + (\Delta \text{OLR}_{k,T} - \Delta \text{OLR}_{k,T,\text{clear}} + \Delta \text{OLR}_{k,T_s} - \Delta \text{OLR}_{k,T_s,\text{clear}} \\ & + \Delta \text{OLR}_{k,q} - \Delta \text{OLR}_{k,q,\text{clear}} + \Delta \text{OLR}_{k,\text{CO}_2} - \Delta \text{OLR}_{k,\text{CO}_2,\text{clear}}) \end{aligned} \quad (5)$$

where, in the subscripts,  $k$  denotes a change in OLR calculated using a kernel, clear denotes quantities calculated using the clear-sky instead of all-sky kernels,  $T$  is atmospheric temperature,  $T_s$  is surface temperature, and  $q$  is specific humidity. Since the Shell et al. (2008) CO<sub>2</sub> forcing kernels were for a doubling of CO<sub>2</sub>, we doubled these kernels to obtain the radiative flux changes for a CO<sub>2</sub> quadrupling.

Figure 9 shows the multi-model mean change in LW CRE calculated using Equation 5. There is a modest cooling effect in the global, multi-model mean (see also Table 3), but there are some places where there is a robust warming effect. The strongest warming effects occur near the eastern equatorial oceans, where the increase in high cloud fraction is greatest, while the strongest cooling effects occur in two belts in the eastern Pacific, which are associated with robust decreases in low and middle cloud fraction (*cf.* Figure 5). There are also widespread cooling effects over the mid-latitude oceans, where low cloud fraction decreases. Generally, an increase in high cloud fraction would be expected to result in a warming effect, because high clouds are much cooler than the surface and are more effective at trapping LW radiation. However, in the case of G1, it appears that the LW effect of the decrease in low cloud fraction compensates for this—, despite the cloud temperature being closer to the surface temperature, because the low cloud reduction occurs over a wide area. The spatial correspondence of areas of strong cooling effects in Figure 9 to areas of strong low cloud fraction decrease in Figure 5a supports this view. Besides cloud fraction, LW radiation is also sensitive to changes in cloud height and cloud optical depth (Zelinka et al., 2012b). It may be that the global mean increase in high cloud fraction that occurs in most models has a limited effect on OLR because the new

clouds being formed are optically thin; we would especially expect this in the case of polar stratospheric clouds. The radiative effects of changes in cloud optical thickness are difficult to assess from the GeoMIP output currently available. These effects have been quantified in global warming simulations using cloud radiative kernels (Zelinka et al., 2012a), but the use of these requires cloud fraction statistics binned by optical depth and cloud top height produced by the ISCCP satellite simulator (Klein and Jakob, 1999; Webb et al., 2001) that is part of the CFMIP Observation Simulator Package (Bodas-Salcedo et al., 2011). The simulator must be run inline with each GCM, or else requires instantaneous cloud fraction output (rather than monthly means) in order to be run retrospectively. The necessary outputs for cloud radiative kernels were saved in the Cloud Feedback Model Intercomparison Project (CFMIP; Bony et al., 2011) but not in GeoMIP. It would be useful to follow the CFMIP protocols in future GeoMIP experiments in order to allow further quantitative analysis of the changes in clouds that occur under combined SW and LW forcings.

#### 4 Connections between radiative effects and required solar reduction

Having quantified the radiative effects of changes in the physical properties of the atmosphere and surface in G1, we now revisit the question of the amount of solar constant reduction required to offset the quadrupling of CO<sub>2</sub>. The solar constant reduction predicted based on effective CO<sub>2</sub> radiative forcing (Equation 1) systematically underestimated the actual reduction required (Figure 1b). In this section we attempt to account for this discrepancy by comparing the amount of extra solar forcing needed with the global means of the radiative adjustments calculated in Section 3. This comparison is shown in Figure 10 for the 8 models for which effective radiative forcing values from Sherwood et al. (2014) were available and all of the radiative adjustments could be calculated. The excess required solar reduction,  $F_{\text{excess}}$ , shown in black, is calculated according to:

$$F_{\text{excess}} = (\Delta S_0(\%)_{\text{actual}} - \Delta S_0(\%)_{\text{predicted}}) \times \frac{1361 \text{ W m}^{-2}}{100\%} \times \frac{1 - \alpha}{4} \quad (6)$$

where  $\Delta S_0(\%)_{\text{actual}}$  is listed in Table 1 and  $\Delta S_0(\%)_{\text{predicted}}$  is calculated using Equation 2. In terms of radiative forcing,  $F_{\text{excess}}$  is the difference between the actual solar forcing required in G1 and the effective forcing from the CO<sub>2</sub> quadrupling.

The relative sizes of the bars in Figure 10 are fairly similar across models. The strongest warming effect is generally from the LW atmospheric temperature adjustment, followed by the SW cloud adjustment. The only consistent cooling effect comes from the LW water vapor adjustment. Surface albedo effects are generally small, as is the SW clear-sky adjustment, with the exceptions discussed in Section 3.1. The LW surface temperature adjustment is practically negligible in all models, while the LW cloud adjustment is also small but has an inter-model range of about 1 W m<sup>-2</sup>. The model with the greatest cooling effect from the LW cloud adjustment, IPSL-CM5A-LR, is the model with the greatest global mean decrease in high cloud fraction, whereas most other models have an increase in high cloud fraction (Table 2).

Comparing the black and gray bars in Figure 10 shows that the sum of all the global mean radiative adjustments more than accounts for the additional solar constant reduction required to balance the CO<sub>2</sub> quadrupling, compared to the amount predicted by Equation 1. The fact that the sum of the radiative adjustments consistently overestimates  $F_{\text{excess}}$  points to the fact that this is not really a fair comparison. Rapid adjustments to a CO<sub>2</sub> quadrupling by itself, which were included in the calculation of

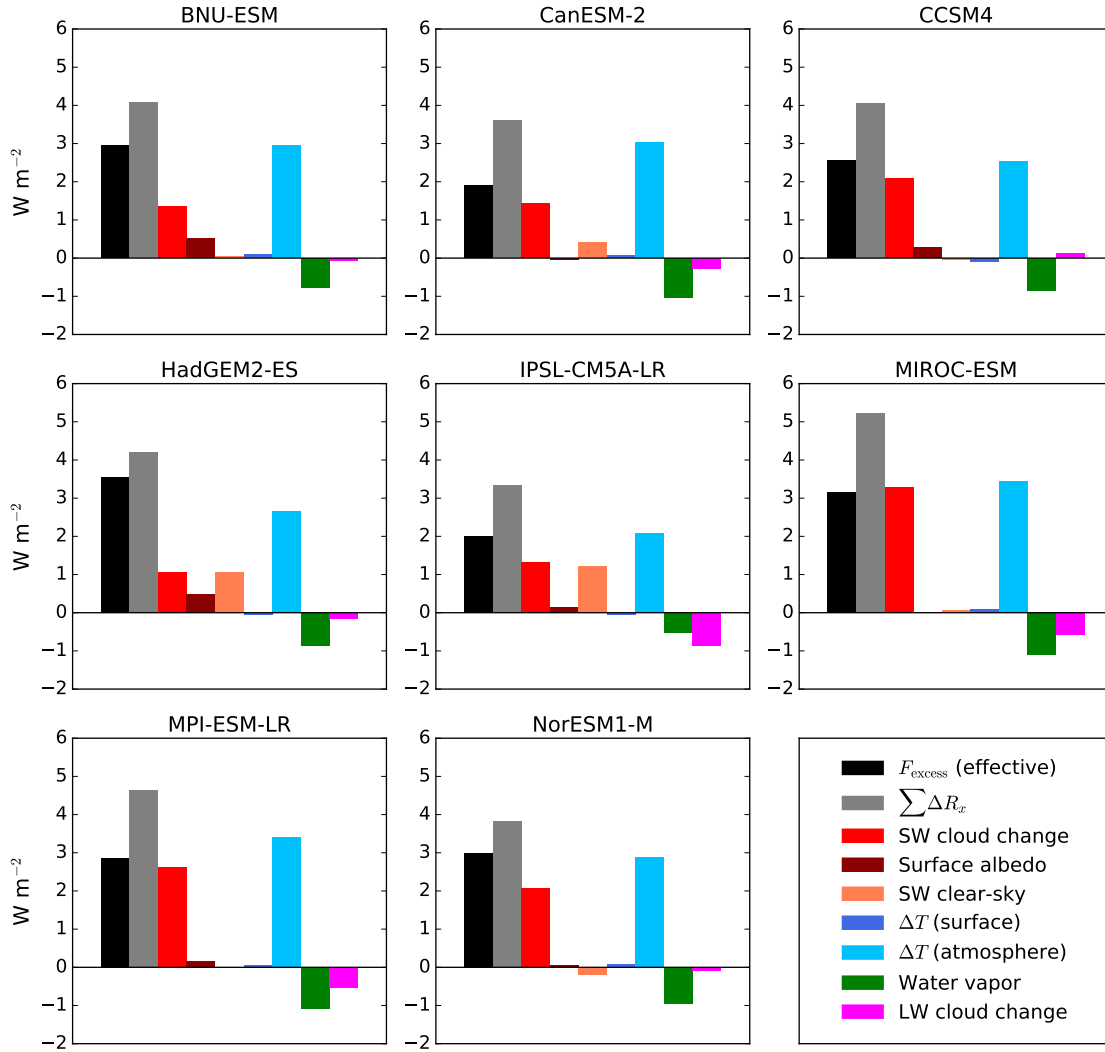

**Figure 10.** Excess required solar radiative forcing in G1 vs. that expected from effective  $\text{CO}_2$  forcing (black bar), global mean SW and LW radiative adjustments (colored bars), and sum of all the radiative adjustments (gray bar), in models for which all of these quantities were calculated. For all except  $F_{\text{excess}}$ , positive values indicate a warming effect (increase in absorbed SW radiation or reduction in OLR). The first three colored bars correspond to the SW radiative adjustments calculated using APRP (multi-model mean maps shown in Figure 7). The three blue and green bars correspond to the LW radiative adjustments calculated using radiative kernels (multi-model mean maps shown in Figure 8). The magenta bar corresponds to the change in LW cloud radiative effect, corrected for cloud masking effects using radiative kernels (multi-model mean map shown in Figure 9).

effective  $\text{CO}_2$  radiative forcing, are being double-counted, because they also show up in the radiative adjustments to the G1 combined forcing, to the extent that they are not canceled by the solar reduction.

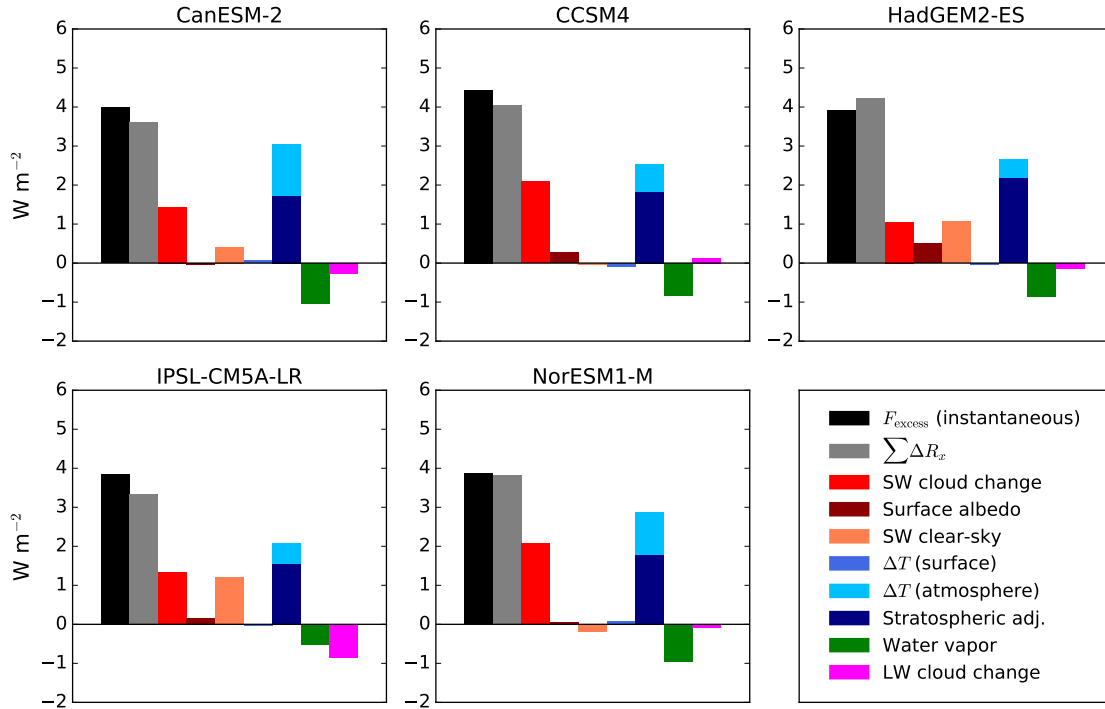

**Figure 11.** As in Figure 10 but with excess solar forcing calculated using instantaneous instead of effective CO<sub>2</sub> radiative forcing. Navy blue bar indicates the reduction in OLR due to stratospheric temperature adjustment from CO<sub>2</sub> quadrupling given by Zhang and Huang (2014), to illustrate the portion of the atmospheric temperature adjustment to G1 attributable to stratospheric cooling.

To account for this, we plot in Figure 11 the same quantities as in Figure 10 but where the black bars are calculated using instantaneous rather than effective CO<sub>2</sub> forcing for the predicted solar constant reduction (*i.e.* using  $F_{4\times\text{CO}_2,\text{inst}}$  rather than  $F_{4\times\text{CO}_2,\text{eff}}$  in Equation 2 and then substituting into Equation 6). ~~By using instantaneous forcing, we can test the hypothesis presented in Equation 3, that the solar radiative forcing that balances a CO<sub>2</sub> quadrupling is equal to the instantaneous CO<sub>2</sub> forcing plus the sum of the radiative adjustments to the combined CO<sub>2</sub> and solar forcings.~~ Expressed mathematically, the comparison done in Figure 11 is:

$$\left( (\Delta S_0(\%))_{\text{actual}} \times \frac{1361 \text{ W m}^{-2}}{100\%} - 4 \times \frac{F_{4\times\text{CO}_2,\text{inst}}}{1-\alpha} \right) \times \frac{1-\alpha}{4} \stackrel{?}{=} \sum \Delta R_X. \quad (7)$$

The black bars in Figure 11 show the left hand side of the Equation 7 while the gray bars show the right hand side. If the two bars are the same size, that means that the actual solar constant reduction ~~will be equal to that predicted by~~ matches that from Equation 3.

Instantaneous forcing, unlike effective forcing, cannot be calculated from monthly mean model output through a simple linear regression of TOA flux changes against surface temperature; instead it requires running each GCM's radiative transfer code offline with standard and quadrupled CO<sub>2</sub> concentrations. For this reason, estimates of instantaneous CO<sub>2</sub> forcing are



available for fewer models than for effective forcing. We used the “double call” instantaneous forcing estimates from the CMIP5 archive shown in Chung and Soden (2015) for the CanESM-2 and IPSL-CM5A-LR models. For three other models (CCSM4, HadGEM2-ES, and NorESM1-M), we use estimates of instantaneous CO<sub>2</sub> forcing given by Zhang and Huang (2014) based on residuals between total TOA flux changes and radiative responses calculated with radiative kernels.

5 In Figure 11, the black and gray bars match to within about 10%, indicating that the theory expressed in Equation 3 works well for explaining the amount of solar constant reduction required to balance a CO<sub>2</sub> increase. ~~The agreement is quite remarkable considering that the~~ Since the equation must be true given energy conservation, this agreement demonstrates that the approximate methods used to calculate the radiative adjustments ~~are approximate~~ work well in the context of G1. In evaluating ~~the theory~~ this agreement, it is useful to express ~~it~~ Equation 3 in terms of total instantaneous solar forcing rather than solar  
10 constant reduction:

$$F_{\text{solar,predicted solar,theory}} = F_{4\times\text{CO}_2,\text{inst}} + \sum \Delta R_X \quad (8)$$

and compare it to the actual solar forcing in G1:

$$F_{\text{solar,actual}} = \Delta S_{0,\text{actual}}(\%) \times \frac{1361 \text{ W m}^{-2}}{100\%} \times \frac{1 - \alpha}{4} . \quad (9)$$

These values are listed in the last two columns of Table 3. The errors in the total solar forcing in G1 ~~predicted by~~ obtained from  
15 Equation 8 are all within 0.5 W m<sup>-2</sup>, or within about 6% of the total, indicating that the instantaneous solar forcing required to balance an abrupt CO<sub>2</sub> increase is well ~~predicted~~ explained by the sum of the instantaneous CO<sub>2</sub> forcing and the radiative adjustments to the combined forcings.

The two largest radiative adjustments to the G1 forcing scenario are the LW atmospheric temperature adjustment and the SW cloud adjustment. Since the temperature adjustment contains effects of both stratospheric and tropospheric temperature  
20 changes, it is worth trying to understand the partitioning between these effects. We have overlaid the OLR reduction due to the stratospheric cooling in abrupt4xCO<sub>2</sub> given by Zhang and Huang (2014) onto the  $\Delta T$  (atmosphere) bar in Figure 11. This OLR reduction is the stratospheric adjustment to the CO<sub>2</sub> forcing, shown in Figure 2b of Hansen et al. (2005). The overlay shows that between about 50% to 75%, depending on the model, of the atmospheric temperature radiative adjustment in G1 is due to cooling of the stratosphere by the increase in CO<sub>2</sub>. The rest is due to a combination of the additional cooling of the stratosphere  
25 from the reduction in insolation and the cooling of the upper troposphere which arises from the surface cooling in the tropics. The water vapor adjustment roughly compensates for the tropospheric component of the temperature adjustment, and these effects are physically linked because a cooler atmosphere emits less LW radiation but also contains less water vapor to absorb radiation from below. Therefore, the main reasons why the instantaneous solar forcing must be greater than the instantaneous CO<sub>2</sub> forcing in order to maintain energy balance are the failure to undo the stratospheric cooling and the reduction in low cloud  
30 fraction.

## 5 Conclusions

~~The amount of solar constant reduction required to offset an increase in CO<sub>2</sub> concentration in terms of TOA radiative balance and global mean temperature is an interesting question with implications for assessing the feasibility of solar geoengineering scenarios and for improving our theoretical understanding of the response of Earth's climate to greenhouse gas and solar forcings. This paper we explains why some intuitive predictions of the solar constant reduction are inaccurate, lays out an alternative hypothesis that the solar constant reduction can be explained based on instantaneous CO<sub>2</sub> forcings and radiative adjustments, and quantifies various radiative responses to the GeoMIP G1 scenario in order to test this hypothesis.~~

~~In the This paper characterizes the physical responses of the atmosphere and surface to the GeoMIP G1 experiment, at the scenario and quantifies their radiative effects, with the goal of explaining what determines the solar constant reduction required to balance the CO<sub>2</sub> increase. At the~~

surface, the tropics cool and the poles warm while global mean temperature remains at preindustrial. The upper troposphere experiences cooling at all latitudes, with the tropical upper troposphere cooling more than the surface. The stratosphere cools more than anywhere else in the atmosphere, due primarily to the CO<sub>2</sub> increase (Govindasamy et al., 2003). The tropospheric temperature effect is a reversal of the negative lapse rate feedback that happens in global warming simulations, in which the tropical upper troposphere warms more than the surface; in G1, because the tropics cool and the tropical temperature profile tends to follow a moist adiabat, the upper troposphere also cools, which has a warming effect on the climate by reducing OLR. Atmospheric specific humidity is reduced in the upper troposphere, which makes the atmosphere less opaque to LW radiation and largely offsets the radiative effect of the tropospheric cooling. Low cloud fraction exhibits a widespread decrease over the ocean and vegetated land areas in all models, which we attribute to decreases in boundary layer inversion strength over the ocean and reduced evaporation from plants due to the physiological response to increased CO<sub>2</sub> over land. The low cloud fraction reduction has a strong surface warming effect due to reduced reflection of sunlight by the clouds. High cloud fraction increases in the global mean in most models, but the LW radiative effect of cloud changes in G1 is slightly negative in the global, multi-model mean. When all the global mean radiative adjustments in G1 are added together, the results account, to within 10%, for the difference between the solar constant reduction that would match the instantaneous CO<sub>2</sub> forcing and the tuned solar constant reduction that met the TOA energy balance threshold required by the G1 experiment protocol.

For future model runs of the G1 experiment, such as those being prepared for the next phase of GeoMIP corresponding to CMIP Phase 6 (Kravitz et al., 2015b), it would be useful to have a better initial guess for the solar constant reduction in order to reduce the necessary amount of tuning. Using Equation 3 for this purpose would be tricky because the radiative responses to the combined CO<sub>2</sub> and solar forcings would be unknown before actually running the model. However, one could simply substitute an empirical value of about 4 W m<sup>-2</sup>, a typical value for the sum of the radiative adjustments in G1 (Figure 10), for  $\sum \Delta R_X$  in Equation 3. Then, tuning would only need to account for model-specific deviations from this number. If instantaneous CO<sub>2</sub> forcing was not available for a particular model, the modelers could add a correction of about 2.5 to 3 W m<sup>-2</sup>, a typical value for the black bars in Figure 10, to the effective CO<sub>2</sub> forcing in Equation 1.

Our analysis of the G1 experiment provides some insights into how the climate responds differently to CO<sub>2</sub> and solar forcings, but more work is necessary to better understand this question. The sums of the radiative adjustments in G1 (gray bars of Figure 11) are about 2 W m<sup>-2</sup> larger than the difference between effective and instantaneous forcing in abrupt4xCO2 (e.g.

Table 1 of Zhang and Huang, 2014). This must be due to some combination of the solar forcing enhancing or imperfectly canceling CO<sub>2</sub>-induced radiative adjustments that warm the planet (such as the stratospheric cooling), and the solar forcing overcompensating for adjustments that cool the planet (such as the tropospheric lapse rate adjustment). Going beyond showing the stratospheric adjustment from abrupt4xCO<sub>2</sub> in Figure 11 to separate the contributions of the CO<sub>2</sub> and solar forcings to the radiative adjustments in G1 would be nontrivial. Regressing the APRP- and kernel-derived radiative responses in the abrupt4xCO<sub>2</sub> experiment against global mean temperature change to obtain the rapid adjustments to the CO<sub>2</sub> quadrupling would run into issues with accuracy due to nonlinearity of feedbacks with temperature increases that would skew the location of the intercept (Armour et al., 2013), so an analysis of GCM runs with increased CO<sub>2</sub> and fixed SSTs would be necessary. Furthermore, it may not be the case that the rapid adjustments to the two forcings add together linearly. While some variables, such as global mean temperature, respond linearly to different combinations of CO<sub>2</sub> and solar forcings (Kravitz et al., 2015a), other aspects of the climate system are inherently nonlinear. LW emission goes with the fourth power of temperature, and specific humidity rises exponentially with temperature, a relationship that affects atmospheric energy transport and the meridional temperature gradient (Hwang et al., 2011; Russotto and Ackerman, 2018). The interactions between the exponential dependence of specific humidity and the 4th power dependence of LW emission on temperature may affect the extent to which the water vapor and tropospheric temperature adjustments compensate for each other, as they seem to roughly cancel in G1 but the water vapor feedback exceeds the lapse rate feedback in global warming simulations (Soden and Held, 2006; Soden et al., 2008; Vial et al., 2013). The water vapor and lapse rate adjustments are dependent on the pattern of tropical cooling and polar warming which might not occur if a latitudinal distribution of solar reflection was targeted to cool the poles more (Ban-Weiss and Caldeira, 2010; Kravitz et al., 2016).

It would be very interesting to study how cloud rapid adjustments and feedbacks differ under solar versus CO<sub>2</sub> forcing in a model intercomparison framework. The cloud fraction changes in G1 imply that rapid cloud responses to CO<sub>2</sub> and solar forcings are different, but this requires further study with GCM runs that perturb only the solar constant and not CO<sub>2</sub>. Since the global mean temperature does not change, the G1 experiment tells us very little about cloud feedbacks, which are temperature dependent. An attempt was made (Huneus et al., 2014) to study cloud rapid adjustments and feedbacks under solar forcings by subtracting the G1 experiment from the abrupt4xCO<sub>2</sub> experiment, but this approach is bound to produce similar feedback parameters for this “solar” forcing versus the abrupt4xCO<sub>2</sub> - piControl CO<sub>2</sub> forcing because, while there are two different baselines, there is only one perturbation run, abrupt4xCO<sub>2</sub>, that has a global mean temperature change onto which radiative flux changes can be regressed. Some studies have included solar-only GCM runs (e.g. Bala et al., 2008; Schaller et al., 2013, 2014; Modak et al., 2016), but these have included only one or two models, and while some, such as Modak et al. (2016), have looked at cloud radiative effects and cloud fraction, none have used methods that account for cloud masking to isolate the radiative effects of physical cloud changes. There is no solar equivalent of abrupt4xCO<sub>2</sub> in CMIP5 or any of its associated projects; the closest analogue is probably the aerosol-forcing-only historical runs from the CMIP5 “historicalMisc” collection, analyzed, e.g., by Salzmann (2016). The Precipitation Driver and Response Model Intercomparison Project (Myhre et al., 2017) includes a solar constant increase experiment ~~and may be a good avenue to explore cloud~~, and the CFMIP component of

CMIP6 will include abrupt solar constant increase and decrease runs (Webb et al., 2017). These ensembles will provide good opportunities to further explore cloud and other changes under solar forcings.

If we were thinking about actually doing solar geoengineering, using Equation 3 to predict the necessary solar reflection would be hampered by the fact that we would not know the radiative responses to the intervention *a priori*. Estimates of these adjustments from models would be subject to uncertainty (note the inter-model spread of  $2 \text{ W m}^{-2}$  in the gray bars of Figure 10), and various aspects of the current anthropogenic radiative forcing, particularly aerosol forcing, also have large uncertainty (Myhre et al., 2013). ~~Observing the climate response to a~~ A smaller-scale geoengineering test that would impose a measurable change in the global mean radiation balance (e.g. Keith et al., 2014), which might require about one tenth the radiative forcing of a full deployment and last about a decade (MacMynowski et al., 2011; Keith et al., 2014), could provide a better estimate of these quantities. Such a test would pose ethical questions related to justice, compensation and informed consent similar to those for a full deployment (Lenferna et al., 2017). Another option would be to actively control the global mean temperature by adjusting the amount of solar reflection every year in response to observations (Kravitz et al., 2014). If solar geoengineering was attempting to actually cool the planet from its temperature at the start of deployment (e.g. back to preindustrial conditions or reversing an overshoot of some temperature target), instead of simply preventing future warming under increasing  $\text{CO}_2$ , then temperature-dependent feedbacks on the solar forcing, which are not captured by the G1 experiment, ~~would may~~ affect the amount of solar geoengineering required, ~~as would time-dependent effects from the inertia of ocean temperature changes.~~ While the lack of correlation with ECS in Figure 1b suggests that the feedbacks would work just as well for cooling as warming, the inertia in the system caused by ocean heat storage would affect the rate at which feedbacks could operate, and we should be cautious about extending arguments based on an assumption of equilibrium to such transient situations. Analysis of other GeoMIP experiments, such as G4, that do impose a global mean temperature change from the solar forcing, could help illustrate these issues. If solar geoengineering was to be done using stratospheric aerosols, then an additional layer of uncertainty regarding microphysical and chemical effects would impact the amount of aerosol injection required to achieve the desired forcing, as summarized by Vioni et al. (2017).

Besides their effects on the required solar forcing, the changes in atmospheric physical properties that occur in G1 are interesting in their own right, and may have policy implications if they translated to a real geoengineering deployment. If low cloud fraction were actually reduced by solar geoengineering, it could result in increased solar energy production, and could enhance vegetation growth in sunlight-limited regimes like the Amazon (Nemani et al., 2003). On the other hand, a reduction in low clouds over the ocean would make it more difficult to do marine cloud brightening at the same time as other forms of solar geoengineering. Changes in cirrus clouds are also relevant in the context of research on the effects of sedimentation of injected stratospheric aerosols on high clouds (Kuebbeler et al., 2012; Vioni et al., 2018) and proposals to intentionally thin cirrus clouds with nucleation-inducing aerosols in order to cool the earth by increased LW emission (Mitchell and Finnegan, 2009). The increase in high clouds in most models in G1 indicates that thermodynamic and radiative adjustments to the forcing scenario can have effects on high clouds that may counteract unintentional or intentional microphysical effects. Our analysis of G1 also illustrates that stratospheric ozone could be affected by changes in stratospheric water vapor resulting from TTL temperature changes. In model runs with actual injection of sulfate aerosols, LW absorption of these particles warms the tropical

tropopause and increases stratospheric water vapor, which results in decreased ozone concentrations (Heckendorn et al., 2009). Keith et al. (2016) suggest that this risk could be mitigated by instead injecting calcite aerosols, which would absorb much less LW radiation than sulfates, but the inconsistency between models in stratospheric water vapor responses to the G1 experiment, which includes no aerosol injection in G1, shows that much uncertainty remains in this area. Taken together, these issues  
5 emphasize the importance of continuing to perform and analyze geoengineering simulations, both in highly idealized scenarios like G1 and more realistic ones like G4 or G4SSA (Tilmes et al., 2015), in order to better understand the climate responses to geoengineering schemes and the different roles played by thermodynamics, radiation, microphysics and chemistry in these responses.

*Author contributions.* R.D. Russotto analyzed the GCM output, produced the figures, and wrote the bulk of the paper. T.P. Ackerman provided general guidance and assisted with the preparation of the manuscript.  
10

*Code availability.* All scripts used to analyze data and create plots are available here:

[https://atmos.washington.edu/~russotto/G1\\_clouds\\_s0\\_paper\\_scripts/index.html](https://atmos.washington.edu/~russotto/G1_clouds_s0_paper_scripts/index.html)

They will be posted to a permanent repository upon acceptance of the paper.

*Acknowledgements.* Three anonymous reviewers provided constructive comments that helped to improve the paper. This work was supported  
15 by a grant to JISAO from the Fund for Innovative Climate and Energy Research. For their roles in producing, coordinating, and making available the CMIP5 and GeoMIP model output, we acknowledge the climate modeling groups (listed in Table 1 of this paper), the World Climate Research Programme's (WCRP) Working Group on Coupled Modelling (WGCM), and the Global Organization for Earth System Science Portals (GO-ESSP). We are grateful to Duoying Ji, Ben Kravitz, Helene Muri, Ulrike Niemeier, Stephen Phipps, and Jin-Ho Yoon for helping to provide access to GeoMIP output that was not available through online repositories; to Karen Shell for helping to explain  
20 how to use the Shell et al. (2008) radiative kernels; and to Eui-Seok Chung for providing numbers for the double-call instantaneous forcing plotted in Chung and Soden (2015). We thank Dargan Frierson, Blaž Gasparini, Cristian Proistosescu, ~~and Brian Rose for discussions~~ Brian Rose, and Robert Wood for discussions and comments that helped to influence the paper.

## References

- Armour, K. C., Bitz, C. M., and Roe, G. H.: Time-Varying Climate Sensitivity from Regional Feedbacks, *Journal of Climate*, 26, 4518–4534, doi:10.1175/JCLI-D-12-00544.1, 2013.
- Arora, V. K., Scinocca, J. F., Boer, G. J., Christian, J. R., Denman, K. L., Flato, G. M., Kharin, V. V., Lee, W. G., and Merryfield, W. J.: Carbon  
5 emission limits required to satisfy future representative concentration pathways of greenhouse gases, *Geophysical Research Letters*, 38, L05805, doi:10.1029/2010GL046270, 2011.
- Bala, G., Duffy, P., and Taylor, K.: Impact of geoengineering schemes on the global hydrological cycle, *Proceedings of the National Academy of Sciences*, 105, 7664–7669, 2008.
- Ban-Weiss, G. and Caldeira, K.: Geoengineering as an optimization problem, *Environmental Research Letters*, 5, 034009, doi:10.1088/1748-  
10 9326/5/3/034009, 2010.
- Bentsen, M., Bethke, I., Debernard, J. B., Iversen, T., Kirkevåg, A., Seland, Ø., Drange, H., Roelandt, C., Seierstad, I. A., Hoose, C., and Kristjánsson, J. E.: The Norwegian Earth System Model, NorESM1-M – Part 1: Description and basic evaluation of the physical climate, *Geoscientific Model Development*, 6, 687–720, doi:10.5194/gmd-6-687-2013, 2013.
- Block, K. and Mauritsen, T.: Forcing and feedback in the MPI-ESM-LR coupled model under abruptly quadrupled CO<sub>2</sub>, *Journal of Advances  
15 in Modeling Earth Systems*, 5, 676–691, doi:10.1002/jame.20041, 2013.
- Bodas-Salcedo, A., Webb, M. J., Bony, S., Chepfer, H., Dufresne, J.-L., Klein, S. A., Zhang, Y., Marchand, R., Haynes, J. M., Pincus, R., and John, V. O.: COSP: Satellite simulation software for model assessment, *Bulletin of the American Meteorological Society*, 92, 1023–1043, doi:10.1175/2011BAMS2856.1, 2011.
- Bony, S., Webb, M., Bretherton, C., Klein, S., Siebesma, P., Tselioudis, G., and Zhang, M.: CFMIP: Towards a better evaluation and under-  
20 standing of clouds and cloud feedbacks in CMIP5 models, *CLIVAR Exchanges*, 56, 20–24, 2011.
- Bretherton, C. S.: Insights into low-latitude cloud feedbacks from high-resolution models, *Philosophical Transactions of the Royal Society of London A: Mathematical, Physical and Engineering Sciences*, 373, doi:10.1098/rsta.2014.0415, 2015.
- Brewer, A.: Evidence for a world circulation provided by the measurement of helium and water vapour distribution in the stratosphere, *Quarterly Journal of the Royal Meteorological Society*, 75, 351–363, 1949.
- Cao, L., Bala, G., Caldeira, K., Nemani, R., and Ban-Weiss, G.: Importance of carbon dioxide physiological forcing to future climate change, *Proceedings of the National Academy of Sciences*, 107, 9513–9518, 2010.  
25
- Chung, E.-S. and Soden, B. J.: An assessment of methods for computing radiative forcing in climate models, *Environmental Research Letters*, 10, 074004, doi:10.1088/1748-9326/10/7/074004, 2015.
- Collins, W. J., Bellouin, N., Doutriaux-Boucher, M., Gedney, N., Halloran, P., Hinton, T., Hughes, J., Jones, C. D., Joshi, M., Liddicoat, S.,  
30 Martin, G., O'Connor, F., Rae, J., Senior, C., Sitch, S., Totterdell, I., Wiltshire, A., and Woodward, S.: Development and evaluation of an Earth-System model – HadGEM2, *Geoscientific Model Development*, 4, 1051–1075, doi:10.5194/gmd-4-1051-2011, 2011.
- Crutzen, P. J.: Albedo Enhancement by Stratospheric Sulfur Injections: A Contribution to Resolve a Policy Dilemma?, *Climatic Change*, 77, 211–220, doi:10.1007/s10584-006-9101-y, 2006.
- Dufresne, J.-L., Foujols, M.-A., Denvil, S., Caubel, A., Marti, O., Aumont, O., Balkanski, Y., Bekki, S., Bellenger, H., Benshila, R., Bony,  
35 S., Bopp, L., Braconnot, P., Brockmann, P., Cadule, P., Cheruy, F., Codron, F., Cozic, A., Cugnet, D., de Noblet, N., Duvel, J.-P., Ethé, C., Fairhead, L., Fichefet, T., Flavoni, S., Friedlingstein, P., Grandpeix, J.-Y., Guez, L., Guilyardi, E., Hauglustaine, D., Hourdin, F., Idelkadi, A., Ghattas, J., Joussaume, S., Kageyama, M., Krinner, G., Labetoulle, S., Lahellec, A., Lefebvre, M.-P., Lefevre, F., Levy, C., Li, Z. X.,

- Lloyd, J., Lott, F., Madec, G., Mancip, M., Marchand, M., Masson, S., Meurdesoif, Y., Mignot, J., Musat, I. d.-., Parouty, S., Polcher, J., Rio, C., Schulz, M., Swingedouw, D., Szopa, S., Talandier, C., Terray, P., Viovy, N., and Vuichard, N.: Climate change projections using the IPSL-CM5 Earth System Model: from CMIP3 to CMIP5, *Climate Dynamics*, 40, 2123–2165, doi:10.1007/s00382-012-1636-1, 2013.
- Feulner, G.: The Faint Young Sun Problem, *Reviews of Geophysics*, 50, RG2006, doi:10.1029/2011RG000375, 2012.
- 5 Field, C. B., Jackson, R. B., and Mooney, H. A.: Stomatal responses to increased CO<sub>2</sub>: implications from the plant to the global scale, *Plant, Cell & Environment*, 18, 1214–1225, doi:10.1111/j.1365-3040.1995.tb00630.x, 1995.
- Fueglistaler, S., Dessler, A. E., Dunkerton, T. J., Folkins, I., Fu, Q., and Mote, P. W.: Tropical tropopause layer, *Reviews of Geophysics*, 47, RG1004, 2009.
- Gent, P. R., Danabasoglu, G., Donner, L. J., Holland, M. M., Hunke, E. C., Jayne, S. R., Lawrence, D. M., Neale, R. B., Rasch, P. J., Vertenstein, M., Worley, P. H., Yang, Z.-L., and Zhang, M.: The Community Climate System Model Version 4, *Journal of Climate*, 24, 4973–4991, doi:10.1175/2011JCLI4083.1, 2011.
- 10 Giorgetta, M. A., Jungclaus, J., Reick, C. H., Legutke, S., Bader, J., Böttinger, M., Brovkin, V., Crueger, T., Esch, M., Fieg, K., Glushak, K., Gayler, V., Haak, H., Hollweg, H.-D., Ilyina, T., Kinne, S., Kornblueh, L., Matei, D., Mauritsen, T., Mikolajewicz, U., Mueller, W., Notz, D., Pithan, F., Raddatz, T., Rast, S., Redler, R., Roeckner, E., Schmidt, H., Schnur, R., Segschneider, J., Six, K. D., Stockhause, M., Timmreck, C., Wegner, J., Widmann, H., Wieners, K.-H., Claussen, M., Marotzke, J., and Stevens, B.: Climate and carbon cycle changes from 1850 to 2100 in MPI-ESM simulations for the Coupled Model Intercomparison Project phase 5, *Journal of Advances in Modeling Earth Systems*, 5, 572–597, doi:10.1002/jame.20038, 2013.
- 15 Govindasamy, B., Caldeira, K., and Duffy, P.: Geoengineering Earth’s radiation balance to mitigate climate change from a quadrupling of CO<sub>2</sub>, *Global and Planetary Change*, 37, 157 – 168, doi:http://dx.doi.org/10.1016/S0921-8181(02)00195-9, 2003.
- 20 Gregory, J. and Webb, M.: Tropospheric Adjustment Induces a Cloud Component in CO<sub>2</sub> Forcing, *Journal of Climate*, 21, 58–71, doi:10.1175/2007JCLI1834.1, 2008.
- Gregory, J. M., Ingram, W. J., Palmer, M. A., Jones, G. S., Stott, P. A., Thorpe, R. B., Lowe, J. A., Johns, T. C., and Williams, K. D.: A new method for diagnosing radiative forcing and climate sensitivity, *Geophysical Research Letters*, 31, n/a–n/a, doi:10.1029/2003GL018747, 103205, 2004.
- 25 Guo, A., Moore, J. C., and Ji, D.: Tropical atmospheric circulation response to the G1 sunshade geoengineering radiative forcing experiment, *Atmospheric Chemistry and Physics Discussions*, 2018, 1–53, doi:10.5194/acp-2018-141, 2018.
- Hansen, J., Sato, M., Ruedy, R., Nazarenko, L., Lacis, A., Schmidt, G. A., Russell, G., Aleinov, I., Bauer, M., Bauer, S., Bell, N., Cairns, B., Canuto, V., Chandler, M., Cheng, Y., Del Genio, A., Faluvegi, G., Fleming, E., Friend, A., Hall, T., Jackman, C., Kelley, M., Kiang, N., Koch, D., Lean, J., Lerner, J., Lo, K., Menon, S., Miller, R., Minnis, P., Novakov, T., Oinas, V., Perlwitz, J., Perlwitz, J., Rind, D., Romanou, A., Shindell, D., Stone, P., Sun, S., Tausnev, N., Thresher, D., Wielicki, B., Wong, T., Yao, M., and Zhang, S.: Efficacy of climate forcings, *Journal of Geophysical Research: Atmospheres*, 110, D18104, doi:10.1029/2005JD005776, 2005.
- 30 Heckendorn, P., Weisenstein, D., Fueglistaler, S., Luo, B. P., Rozanov, E., Schraner, M., Thomason, L. W., and Peter, T.: The impact of geoengineering aerosols on stratospheric temperature and ozone, *Environmental Research Letters*, 4, 045 108, doi:10.1088/1748-9326/4/4/045108, 2009.
- 35 Held, I. M. and Soden, B. J.: Robust Responses of the Hydrological Cycle to Global Warming, *Journal of Climate*, 19, 5686–5699, doi:http://dx.doi.org/10.1175/JCLI3990.1, 2006.



- Hong, Y., Moore, J. C., Jevrejeva, S., Ji, D., Phipps, S. J., Lenton, A., Tilmes, S., Watanabe, S., and Zhao, L.: Impact of the GeoMIP G1 sunshade geoengineering experiment on the Atlantic meridional overturning circulation, *Environmental Research Letters*, 12, 034009, doi:10.1088/1748-9326/aa5fb8, 2017.
- Huneus, N., Boucher, O., Alterskjær, K., Cole, J. N. S., Curry, C. L., Ji, D., Jones, A., Kravitz, B., Kristjánsson, J. E., Moore, J. C., Muri, H., Niemeier, U., Rasch, P., Robock, A., Singh, B., Schmidt, H., Schulz, M., Tilmes, S., Watanabe, S., and Yoon, J.-H.: Forcings and feedbacks in the GeoMIP ensemble for a reduction in solar irradiance and increase in CO<sub>2</sub>, *Journal of Geophysical Research: Atmospheres*, 119, 5226–5239, doi:10.1002/2013JD021110, <http://dx.doi.org/10.1002/2013JD021110>, 2013JD021110, 2014.
- Hurrell, J. W., Holland, M. M., Gent, P. R., Ghan, S., Kay, J. E., Kushner, P. J., Lamarque, J.-F., Large, W. G., Lawrence, D., Lindsay, K., Lipscomb, W. H., Long, M. C., Mahowald, N., Marsh, D. R., Neale, R. B., Rasch, P., Vavrus, S., Vertenstein, M., Bader, D., Collins, W. D., Hack, J. J., Kiehl, J., and Marshall, S.: The Community Earth System Model: A Framework for Collaborative Research, *Bulletin of the American Meteorological Society*, 94, 1339–1360, doi:10.1175/BAMS-D-12-00121.1, 2013.
- Hwang, Y.-T., Frierson, D. M. W., and Kay, J. E.: Coupling between Arctic feedbacks and changes in poleward energy transport, *Geophysical Research Letters*, 38, L17704, doi:10.1029/2011GL048546, 2011.
- IPCC: Climate Change 2013: The Physical Science Basis. Contribution of Working Group I to the Fifth Assessment Report of the Intergovernmental Panel on Climate Change, Cambridge University Press, Cambridge, United Kingdom and New York, NY, USA, doi:10.1017/CBO9781107415324, [www.climatechange2013.org](http://www.climatechange2013.org), 2013.
- Ji, D., Wang, L., Feng, J., Wu, Q., Cheng, H., Zhang, Q., Yang, J., Dong, W., Dai, Y., Gong, D., Zhang, R.-H., Wang, X., Liu, J., Moore, J. C., Chen, D., and Zhou, M.: Description and basic evaluation of Beijing Normal University Earth System Model (BNU-ESM) version 1, *Geoscientific Model Development*, 7, 2039–2064, doi:10.5194/gmd-7-2039-2014, <http://www.geosci-model-dev.net/7/2039/2014/>, 2014.
- Keith, D. W., Duren, R., and MacMartin, D. G.: Field experiments on solar geoengineering: report of a workshop exploring a representative research portfolio, *Philosophical Transactions of the Royal Society A*, 372, 20140 175, doi:10.1098/rsta.2014.0175, 2014.
- Keith, D. W., Weisenstein, D. K., Dykema, J. A., and Keutsch, F. N.: Stratospheric solar geoengineering without ozone loss, *Proceedings of the National Academy of Sciences*, 113, 14 910–14 914, doi:10.1073/pnas.1615572113, 2016.
- Klein, S. A. and Hartmann, D. L.: The seasonal cycle of low stratiform clouds, *Journal of Climate*, 6, 1587–1606, 1993.
- Klein, S. A. and Jakob, C.: Validation and Sensitivities of Frontal Clouds Simulated by the ECMWF Model, *Monthly Weather Review*, 127, 2514–2531, doi:10.1175/1520-0493(1999)127<2514:VASOFC>2.0.CO;2, 1999.
- Kravitz, B., Robock, A., Boucher, O., Schmidt, H., and Taylor, K. E.: Specifications for GeoMIP experiments G1 through G4, URL: [http://climate.envsci.rutgers.edu/GeoMIP/docs/specificationsG1\\_G4\\_v1.0.pdf](http://climate.envsci.rutgers.edu/GeoMIP/docs/specificationsG1_G4_v1.0.pdf) [Accessed March 2015], Version 1.0, 2011a.
- Kravitz, B., Robock, A., Boucher, O., Schmidt, H., Taylor, K. E., Stenchikov, G., and Schulz, M.: The Geoengineering Model Intercomparison Project (GeoMIP), *Atmospheric Science Letters*, 12, 162–167, doi:10.1002/asl.316, 2011b.
- Kravitz, B., Caldeira, K., Boucher, O., Robock, A., Rasch, P. J., Alterskjær, K., Karam, D. B., Cole, J. N. S., Curry, C. L., Haywood, J. M., Irvine, P. J., Ji, D., Jones, A., Kristjánsson, J. E., Lunt, D. J., Moore, J. C., Niemeier, U., Schmidt, H., Schulz, M., Singh, B., Tilmes, S., Watanabe, S., Yang, S., and Yoon, J.-H.: Climate model response from the Geoengineering Model Intercomparison Project (GeoMIP), *Journal of Geophysical Research: Atmospheres*, 118, 8320–8332, doi:10.1002/jgrd.50646, 2013a.
- Kravitz, B., Rasch, P. J., Forster, P. M., Andrews, T., Cole, J. N. S., Irvine, P. J., Ji, D., Kristjánsson, J. E., Moore, J. C., Muri, H., Niemeier, U., Robock, A., Singh, B., Tilmes, S., Watanabe, S., and Yoon, J.-H.: An energetic perspective on hydrological cycle changes in the Geoengineering Model Intercomparison Project, *Journal of Geophysical Research: Atmospheres*, 118, 13,087–13,102, doi:10.1002/2013JD020502, 2013b.

- Kravitz, B., MacMartin, D. G., Leedal, D. T., Rasch, P. J., and Jarvis, A. J.: Explicit feedback and the management of uncertainty in meeting climate objectives with solar geoengineering, *Environmental Research Letters*, 9, 044 006, doi:10.1088/1748-9326/9/4/044006, 2014.
- Kravitz, B., MacMartin, D. G., Rasch, P. J., and Jarvis, A. J.: A New Method of Comparing Forcing Agents in Climate Models, *Journal of Climate*, 28, 8203–8218, doi:10.1175/JCLI-D-14-00663.1, 2015a.
- 5 Kravitz, B., Robock, A., Tilmes, S., Boucher, O., English, J. M., Irvine, P. J., Jones, A., Lawrence, M. G., MacCracken, M., Muri, H., Moore, J. C., Niemeier, U., Phipps, S. J., Sillmann, J., Storelvmo, T., Wang, H., and Watanabe, S.: The Geoengineering Model Inter-comparison Project Phase 6 (GeoMIP6): simulation design and preliminary results, *Geoscientific Model Development*, 8, 3379–3392, doi:10.5194/gmd-8-3379-2015, 2015b.
- Kravitz, B., MacMartin, D., Wang, H., and Rasch, P.: Geoengineering as a design problem, *Earth System Dynamics*, 7, 469–497, doi:10.5194/esd-7-469-2016, 2016.
- 10 Kuebbeler, M., Lohmann, U., and Feichter, J.: Effects of stratospheric sulfate aerosol geo-engineering on cirrus clouds, *Geophysical Research Letters*, 39, L23803, doi:10.1029/2012GL053797, 2012.
- Lenferna, G. A., Russotto, R. D., Tan, A., Gardiner, S. M., and Ackerman, T. P.: Relevant climate response tests for stratospheric aerosol injection: A combined ethical and scientific analysis, *Earth’s Future*, 5, 577–591, doi:10.1002/2016EF000504, 2017.
- 15 [MacMynowski, D. G., Keith, D. W., Caldeira, K., and Shin, H.-J.: Can we test geoengineering?, \*Energy Environ. Sci.\*, 4, 5044–5052, doi:10.1039/c1ee01256h, 2011.](#)
- Manabe, S. and Wetherald, R. T.: The Effects of Doubling the CO<sub>2</sub> Concentration on the Climate of a General Circulation Model, *Journal of the Atmospheric Sciences*, 32, 3–15, doi:10.1175/1520-0469(1975)032<0003:TEODTC>2.0.CO;2, 1975.
- [Matthews, H. D. and Caldeira, K.: Transient climate–carbon simulations of planetary geoengineering, \*Proceedings of the National Academy of Sciences\*, 104, 9949–9954, doi:10.1073/pnas.0700419104, 2007.](#)
- 20 [Mitchell, D. L. and Finnegan, W.: Modification of cirrus clouds to reduce global warming, \*Environmental Research Letters\*, 4, 045102, doi:10.1088/1748-9326/4/4/045102, 2009.](#)
- Modak, A., Bala, G., Cao, L., and Caldeira, K.: Why must a solar forcing be larger than a CO<sub>2</sub> forcing to cause the same global mean surface temperature change?, *Environmental Research Letters*, 11, 044013, 2016.
- 25 Myhre, G., Shindell, D., Bréon, F.-M., Collins, W., Fuglestad, J., Huang, J., Koch, D., Lamarque, J.-F., Lee, D., Mendoza, B., Nakajima, T., Robock, A., Stephens, G., Takemura, T., and Zhang, H.: Anthropogenic and Natural Radiative Forcing, in: *Climate Change 2013: The Physical Science Basis. Contribution of Working Group I to the Fifth Assessment Report of the Intergovernmental Panel on Climate Change*, edited by Stocker, T., Qin, D., Plattner, G.-K., Tignor, M., Allen, S., Boschung, J., Nauels, A., Xia, Y., Bex, V., and Midgley, P., chap. 8, p. 659–740, Cambridge University Press, Cambridge, United Kingdom and New York, NY, USA, doi:10.1017/CBO9781107415324.018, www.climatechange2013.org, 2013.
- 30 Myhre, G., Forster, P. M., Samset, B. H., Hodnebrog, Ø., Sillmann, J., Aalberg, S. G., Andrews, T., Boucher, O., Faluvegi, G., Fläschner, D., Iversen, T., Kasoar, M., Kharin, V., Kirkevåg, A., Lamarque, J.-F., Olivie, D., Richardson, T. B., Shindell, D., Shine, K. P., Stjern, C. W., Takemura, T., Voulgarakis, A., and Zwiers, F.: PDRMIP: A Precipitation Driver and Response Model Intercomparison Project—Protocol and Preliminary Results, *Bulletin of the American Meteorological Society*, 98, 1185–1198, doi:10.1175/BAMS-D-16-0019.1, 2017.
- 35 Nemani, R. R., Keeling, C. D., Hashimoto, H., Jolly, W. M., Piper, S. C., Tucker, C. J., Myneni, R. B., and Running, S. W.: Climate-Driven Increases in Global Terrestrial Net Primary Production from 1982 to 1999, *Science*, 300, 1560–1563, doi:10.1126/science.1082750, 2003.
- Newell, R. E. and Gould-Stewart, S.: A Stratospheric Fountain?, *Journal of the Atmospheric Sciences*, 38, 2789–2796, 1981.

- NOAA: U.S. Standard Atmosphere: 1976, National Oceanographic and Atmospheric Administration, Washington, DC, NOAA-S/T 76-1562, 1976.
- Pendergrass, A. G., Conley, A., and Vitt, F. M.: Surface and top-of-atmosphere radiative feedback kernels for CESM-CAM5, *Earth System Science Data*, 10, 317–324, doi:10.5194/essd-10-317-2018, 2018.
- 5 Phipps, S. J., Rotstayn, L. D., Gordon, H. B., Roberts, J. L., Hirst, A. C., and Budd, W. F.: The CSIRO Mk3L climate system model version 1.0 – Part 1: Description and evaluation, *Geoscientific Model Development*, 4, 483–509, doi:10.5194/gmd-4-483-2011, 2011.
- Qu, X., Hall, A., Klein, S., and Caldwell, P. M.: On the spread of changes in marine low cloud cover in climate model simulations of the 21st century, *Climate Dynamics*, 42, 2603–2626, 2014.
- Rossow, W. B. and Schiffer, R. A.: Advances in Understanding Clouds from ISCCP, *Bulletin of the American Meteorological Society*, 80, 2261–2287, doi:10.1175/1520-0477(1999)080<2261:AIUCFI>2.0.CO;2, 1999.
- 10 Russotto, R. D. and Ackerman, T. P.: Energy transport, polar amplification, and ITCZ shifts in the GeoMIP G1 ensemble, *Atmospheric Chemistry and Physics*, 18, 2287–2305, doi:10.5194/acp-18-2287-2018, 2018.
- Salzmann, M.: Global warming without global mean precipitation increase?, *Science Advances*, 2, doi:10.1126/sciadv.1501572, 2016.
- Santer, B., Wehner, M., Wigley, T., Sausen, R., Meehl, G., Taylor, K., Ammann, C., Arblaster, J., Washington, W., Boyle, J., and
- 15 Brügemann, W.: Contributions of Anthropogenic and Natural Forcing to Recent Tropopause Height Changes, *Science*, 301, 479–483, doi:10.1126/science.1084123, 2003.
- Schaller, N., Cermak, J., Wild, M., and Knutti, R.: The sensitivity of the modeled energy budget and hydrological cycle to CO<sub>2</sub> and solar forcing, *Earth System Dynamics*, 4, 253–266, doi:10.5194/esd-4-253-2013, 2013.
- Schaller, N., Sedláček, J., and Knutti, R.: The asymmetry of the climate system’s response to solar forcing changes and its implications for
- 20 geoengineering scenarios, *Journal of Geophysical Research: Atmospheres*, 119, 5171–5184, doi:10.1002/2013JD021258, 2014.
- Schmidt, G. A., Kelley, M., Nazarenko, L., Ruedy, R., Russell, G. L., Aleinov, I., Bauer, M., Bauer, S. E., Bhat, M. K., Bleck, R., Canuto, V., Chen, Y.-H., Cheng, Y., Clune, T. L., Del Genio, A., de Fainchtein, R., Faluvegi, G., Hansen, J. E., Healy, R. J., Kiang, N. Y., Koch, D., Lacis, A. A., LeGrande, A. N., Lerner, J., Lo, K. K., Matthews, E. E., Menon, S., Miller, R. L., Oinas, V., Olosa, A. O., Perlwitz, J. P., Puma, M. J., Putman, W. M., Rind, D., Romanou, A., Sato, M., Shindell, D. T., Sun, S., Syed, R. A., Tausnev, N., Tsigaridis, K., Unger,
- 25 N., Voulgarakis, A., Yao, M.-S., and Zhang, J.: Configuration and assessment of the GISS ModelE2 contributions to the CMIP5 archive, *Journal of Advances in Modeling Earth Systems*, 6, 141–184, doi:10.1002/2013MS000265, 2014.
- Schmidt, H., Alterskjær, K., Bou Karam, D., Boucher, O., Jones, A., Kristjánsson, J. E., Niemeier, U., Schulz, M., Aaheim, A., Benduhn, F., Lawrence, M., and Timmreck, C.: Solar irradiance reduction to counteract radiative forcing from a quadrupling of CO<sub>2</sub>: climate responses simulated by four earth system models, *Earth System Dynamics*, 3, 63–78, doi:10.5194/esd-3-63-2012, 2012.
- 30 Shell, K. M., Kiehl, J. T., and Shields, C. A.: Using the Radiative Kernel Technique to Calculate Climate Feedbacks in NCAR’s Community Atmospheric Model, *Journal of Climate*, 21, 2269–2282, doi:10.1175/2007JCLI2044.1, 2008.
- Sherwood, S. C., Bony, S., and Dufresne, J.-L.: Spread in model climate sensitivity traced to atmospheric convective mixing, *Nature*, 505, 37–42, doi:10.1038/nature12829, 2014.
- Slingo, J.: The development and verification of a cloud prediction scheme for the ECMWF model, *Quarterly Journal of the Royal Meteorological Society*, 113, 899–927, 1987.
- 35 Smyth, J. E., Russotto, R. D., and Storelvmo, T.: Thermodynamic and dynamic responses of the hydrological cycle to solar dimming, *Atmospheric Chemistry and Physics*, pp. 1–17, ~~–, accepted article, 17, 6439–6453~~, doi:10.5194/acp-17-6439-2017, <https://www.atmos-chem-phys.net/17/6439/2017/>, 2017.

- Soden, B. J. and Held, I. M.: An Assessment of Climate Feedbacks in Coupled Ocean-Atmosphere Models, *Journal of Climate*, 19, 3354–3360, doi:10.1175/JCLI3799.1, 2006.
- Soden, B. J., Held, I. M., Colman, R., Shell, K. M., Kiehl, J. T., and Shields, C. A.: Quantifying Climate Feedbacks Using Radiative Kernels, *Journal of Climate*, 21, 3504–3520, 2008.
- 5 Taylor, K. E., Crucifix, M., Braconnot, P., Hewitt, C. D., Doutriaux, C., Broccoli, A. J., Mitchell, J. F. B., and Webb, M. J.: Estimating Shortwave Radiative Forcing and Response in Climate Models, *Journal of Climate*, 20, 2530–2543, doi:10.1175/JCLI4143.1, 2007.
- Taylor, K. E., Stouffer, R. J., and Meehl, G. A.: An overview of CMIP5 and the Experiment Design, *Bulletin of the American Meteorological Society*, 93, 485–198, 2012.
- Tilmes, S., Fasullo, J., Lamarque, J.-F., Marsh, D. R., Mills, M., Alterskjær, K., Muri, H., Kristjánsson, J. E., Boucher, O., Schulz, M., Cole, J.  
10 N. S., Curry, C. L., Jones, A., Haywood, J., Irvine, P. J., Ji, D., Moore, J. C., Karam, D. B., Kravitz, B., Rasch, P. J., Singh, B., Yoon, J.-H., Niemeier, U., Schmidt, H., Robock, A., Yang, S., and Watanabe, S.: The hydrological impact of geoengineering in the Geoengineering Model Intercomparison Project (GeoMIP), *Journal of Geophysical Research: Atmospheres*, 118, 11,036–11,058, doi:10.1002/jgrd.50868, 2013.
- Tilmes, S., Mills, M. J., Niemeier, U., Schmidt, H., Robock, A., Kravitz, B., Lamarque, J.-F., Pitari, G., and English, J. M.: A new Geoengi-  
15 neering Model Intercomparison Project (GeoMIP) experiment designed for climate and chemistry models, *Geoscientific Model Development*, 8, 43–49, doi:10.5194/gmd-8-43-2015, 2015.
- Vial, J., Dufresne, J.-L., and Bony, S.: On the interpretation of inter-model spread in CMIP5 climate sensitivity estimates, *Climate Dynamics*, 41, 3339–3362, doi:10.1007/s00382-013-1725-9, 2013.
- Vimont, D.: Dan Vimont’s Matlab Libraries, <http://www.aos.wisc.edu/~dvimont/matlab/>.
- 20 Visioni, D., Pitari, G., and Auqila, V.: Sulfate geoengineering: a review of the factors controlling the needed injection of sulfur dioxide, *Atmospheric Chemistry and Physics*, 17, 3879–3889, doi:10.5194/acp-17-3879-2017, 2017.
- Visioni, D., Pitari, G., and di Genova, G.: Upper tropospheric ice sensitivity to sulfate geoengineering, *Atmospheric Chemistry and Physics Discussions*, 2018, 1–37, doi:10.5194/acp-2018-107, 2018.
- Watanabe, S., Hajima, T., Sudo, K., Nagashima, T., Takemura, T., Okajima, H., Nozawa, T., Kawase, H., Abe, M., Yokohata, T., Ise, T.,  
25 Sato, H., Kato, E., Takata, K., Emori, S., and Kawamiya, M.: MIROC-ESM 2010: model description and basic results of CMIP5-20C3M experiments, *Geoscientific Model Development*, 4, 845–872, doi:10.5194/gmd-4-845-2011, 2011.
- Webb, M., Senior, C., Bony, S., and Morcrette, J.-J.: Combining ERBE and ISCCP data to assess clouds in the Hadley Centre, ECMWF and LMD atmospheric climate models, *Climate Dynamics*, 17, 905–922, doi:10.1007/s003820100157, 2001.
- [Webb, M. J., Andrews, T., Bodas-Salcedo, A., Bony, S., Bretherton, C. S., Chadwick, R., Chepfer, H., Douville, H., Good, P., Kay, J. E., Klein, S. A., Marchand, R., Medeiros, B., Siebesma, A. P., Skinner, C. B., Stevens, B., Tselioudis, G., Tsushima, Y., and Watanabe, M.: The Cloud Feedback Model Intercomparison Project \(CFMIP\) contribution to CMIP6, \*Geoscientific Model Development\*, 10, 359–384, doi:10.5194/gmd-10-359-2017, 2017.](#)  
30
- Wetherald, R. T. and Manabe, S.: The effects of changing the solar constant on the climate of a general circulation model, *Journal of the Atmospheric Sciences*, 32, 2044–2059, 1975.
- 35 Wood, R. and Bretherton, C. S.: On the Relationship between Stratiform Low Cloud Cover and Lower-Tropospheric Stability, *Journal of Climate*, 19, 6425–6432, 2006.
- World Meteorological Organization: WMO Greenhouse Gas Bulletin, [https://library.wmo.int/opac/doc\\_num.php?explnum\\_id=4022](https://library.wmo.int/opac/doc_num.php?explnum_id=4022), 2017.

Zelinka, M. D., Klein, S. A., and Hartmann, D. L.: Computing and Partitioning Cloud Feedbacks Using Cloud Property Histograms. Part I: Cloud Radiative Kernels, *J. Climate*, 25, 3715–3735, 2012a.

Zelinka, M. D., Klein, S. A., and Hartmann, D. L.: Computing and Partitioning Cloud Feedbacks Using Cloud Property Histograms. Part II: Attribution to Changes in Cloud Amount, Altitude, and Optical Depth, *J. Climate*, 25, 3736–3754, doi:10.1175/JCLI-D-11-00249.1, 2012b.

Zhang, M. and Huang, Y.: Radiative Forcing of Quadrupling CO<sub>2</sub>, *Journal of Climate*, 27, 2496–2508, doi:10.1175/JCLI-D-13-00535.1, 2014.

# Changes in clouds and thermodynamics under solar geoengineering and implications for required solar reduction

Rick D. Russotto<sup>1</sup> and Thomas P. Ackerman<sup>1,2</sup>

<sup>1</sup>Department of Atmospheric Sciences, University of Washington, Seattle, Washington, USA

<sup>2</sup>Joint Institute for the Study of the Atmosphere and Ocean, University of Washington, Seattle, Washington, USA

*Correspondence to:* Rick D. Russotto (russotto@uw.edu)

## Abstract.

The amount of solar constant reduction required to offset the global warming from an increase in atmospheric CO<sub>2</sub> concentration is an interesting question with implications for assessing the feasibility of solar geoengineering scenarios and for improving our theoretical understanding of Earth's climate response to greenhouse gas and solar forcings. This study investigates this question by analyzing the results of 11 coupled atmosphere-ocean global climate models running Experiment G1 of the Geoengineering Model Intercomparison Project, in which CO<sub>2</sub> concentrations are abruptly quadrupled and the solar constant is simultaneously reduced by an amount tuned to maintain top of atmosphere energy balance and preindustrial global mean temperature. The required solar constant reduction in G1 is between 3.2% and 5.0%, depending on the model, and is uncorrelated with the models' equilibrium climate sensitivity, while a formula from the experiment specifications based on the models' effective CO<sub>2</sub> forcing and planetary albedo is well-correlated with but consistently underpredicts the required solar reduction. We propose an explanation for the required solar reduction based on CO<sub>2</sub> instantaneous forcing and the sum of radiative adjustments to the combined CO<sub>2</sub> and solar forcings. We quantify these radiative adjustments in G1 using established methods and explore changes in atmospheric temperature, humidity and cloud fraction in order to understand the causes of these radiative adjustments.

The zonal mean temperature response in G1 exhibits cooling in the tropics and warming in high latitudes at the surface; greater cooling in the upper troposphere at all latitudes; and stratospheric cooling which is mainly due to the CO<sub>2</sub> increase. Tropospheric specific humidity decreases due to the temperature decrease, while stratospheric humidity may increase or decrease depending on the model's temperature change in the tropical tropopause layer. Low cloud fraction decreases in all models in G1, an effect that is robust and widespread across ocean and vegetated land areas. We attribute this to a reduction in boundary layer inversion strength over the ocean, and a reduction in the release of water from plants due to the increased CO<sub>2</sub>. High cloud fraction increases in the global mean in most models. The low cloud fraction reduction and atmospheric temperature decrease have strong warming effects on the planet, due to reduced reflection of shortwave radiation and reduced emission of longwave radiation, respectively. About 50% to 75% of the temperature effect is caused by the stratospheric cooling, while the reduction in atmospheric humidity results in increased outgoing longwave radiation that roughly offsets the tropospheric temperature effect. The LW effect of the cloud changes is small in the global mean, despite the increase in high cloud fraction. Taken together, the sum of the diagnosed radiative adjustments and the CO<sub>2</sub> instantaneous forcing explains the

required solar forcing in G1 to within about 6%. The cloud fraction response to the G1 experiment raises interesting questions about cloud rapid adjustments and feedbacks under solar versus greenhouse forcings, which would be best explored in a model intercomparison framework with a solar-forcing-only experiment.

## 1 Introduction

5 In light of the warming of Earth in response to anthropogenic greenhouse gas emissions (IPCC, 2013), and continued lack of progress in curbing those emissions (World Meteorological Organization, 2017), some (e.g. Crutzen, 2006) have argued for serious consideration of solar geoengineering, or reflecting sunlight to artificially cool the Earth, as a means of reducing harms from climate change. The Geoengineering Model Intercomparison Project (GeoMIP; Kravitz et al. (2011b)) was created to study the climate impacts of solar geoengineering schemes. GeoMIP consists of a set of standardized experiments for global  
10 climate models (GCMs) that include both an increase in CO<sub>2</sub> and some compensating effect, such as a reduction in the solar constant or an increase in stratospheric aerosol concentration. In Experiment G1, the simplest of the GeoMIP experiments, the CO<sub>2</sub> concentration is abruptly quadrupled relative to preindustrial levels, as in the abrupt4xCO2 experiment from the Coupled Model Intercomparison Project, Phase 5 (CMIP5; Taylor et al. (2012)), and at the same time the solar constant is abruptly reduced by an amount tuned to maintain top of atmosphere (TOA) energy balance and therefore keep the global mean  
15 temperature approximately at preindustrial levels. Besides providing an important theoretical underpinning to the consideration of solar geoengineering scenarios, the G1 experiment is helpful for improving our fundamental understanding of how the climate responds differently to solar forcings, which operate in the shortwave (SW) part of the radiative spectrum, versus greenhouse gas forcings, which operate in the longwave (LW), and how linear the response is to combinations of SW and LW forcings. This can help us understand paleoclimates in which the sun was weaker (Feulner, 2012), attribution of climate change  
20 to anthropogenic as opposed to solar forcings (Santer et al., 2003), and the response of the climate to non-solar SW forcings such as aerosol forcings (Salzmann, 2016).

An interesting question related to G1 is what amount of solar constant reduction  $|\Delta S_0|$  is required to compensate for the CO<sub>2</sub> increase. (For convenience, we hereafter drop the absolute value symbol and use  $\Delta S_0$  to refer to the solar constant reduction, keeping in mind that the sign of the change is always negative in this context.) This quantity varies between about 3%-5%  
25 depending on the model; the values for each model, which in every case achieved a global mean surface air temperature within 0.3 K of that in the CMIP5 preindustrial control (piControl) experiment, are listed in Table 1. Because of its implications for the scale of the solar geoengineering intervention that would be required, it is important to understand what determines this quantity. We start our investigation of this question by plotting in Figure 1a the required values of  $\Delta S_0$  versus the values predicted by a simple formula based on matching the reduction in outgoing LW radiation (OLR) from the CO<sub>2</sub> increase with a  
30 reduction in the absorbed SW radiation:

$$\Delta S_0 = 4 \times \frac{F_{4\times\text{CO}_2,\text{eff}}}{1 - \alpha} \quad (1)$$



**Table 1.** Models included in this study, with references, institutions, solar constant reduction in the G1 experiment ( $\Delta S_0$ ), and global mean surface air temperature change in G1 - piControl ( $\Delta T$ ). All have a full dynamical ocean coupled to the atmosphere.

| Model          | Reference               | Institution                                                                                                                                                                     | $\Delta S_0$ | $\Delta T$ (K) |
|----------------|-------------------------|---------------------------------------------------------------------------------------------------------------------------------------------------------------------------------|--------------|----------------|
| BNU-ESM        | Ji et al. (2014)        | Beijing Normal University                                                                                                                                                       | 4.4%         | 0.025          |
| CanESM-2       | Arora et al. (2011)     | Canadian Centre for Climate Modeling and Analysis                                                                                                                               | 4.0%         | -0.013         |
| CCSM4          | Gent et al. (2011)      | National Center for Atmospheric Research                                                                                                                                        | 4.1%         | 0.233          |
| CESM-CAM5.1-FV | Hurrell et al. (2013)   | National Center for Atmospheric Research                                                                                                                                        | 4.7%         | -0.157         |
| CSIRO-Mk3L-1-2 | Phipps et al. (2011)    | Commonwealth Scientific and Industrial Research Organization/<br>Bureau of Meteorology                                                                                          | 3.2%         | 0.034          |
| GISS-E2-R      | Schmidt et al. (2014)   | NASA Goddard Institute for Space Studies                                                                                                                                        | 4.5%         | -0.292         |
| HadGEM2-ES     | Collins et al. (2011)   | Met Office Hadley Centre                                                                                                                                                        | 3.9%         | 0.241          |
| IPSL-CM5A-LR   | Dufresne et al. (2013)  | Institut Pierre Simon Laplace                                                                                                                                                   | 3.5%         | 0.109          |
| MIROC-ESM      | Watanabe et al. (2011)  | Atmosphere and Ocean Research Institute (The University of Tokyo),<br>National Institute for Environmental Studies,<br>and Japan Agency for Marine-Earth Science and Technology | 5.0%         | -0.065         |
| MPI-ESM-LR     | Giorgetta et al. (2013) | Max Planck Institute for Meteorology                                                                                                                                            | 4.7%         | -0.011         |
| NorESM1        | Bentsen et al. (2013)   | Bjerknes Centre for Climate Research,<br>Norwegian Meteorological Institute                                                                                                     | 4.0%         | -0.044         |

For BNU-ESM, we are using a new realization, r3i1p1, that has a greater solar constant reduction and better compensates global mean temperature than the original. Two models that originally participated in G1, EC-Earth and HadCM3, are excluded from our analysis because many of the output fields necessary for this study were not available.

or, in percentage terms,

$$\Delta S_0(\%) = \left( 4 \times \frac{F_{4xCO_2,eff}}{1 - \alpha} \right) \times \frac{100\%}{S_0} \quad (2)$$

where  $S_0$  is the solar constant (about  $1361 \text{ W m}^{-2}$ ),  $\alpha$  is the model's planetary albedo, and  $F_{4xCO_2,eff}$  is the effective radiative forcing from a  $CO_2$  quadrupling, calculated by regressing net TOA radiative flux against global mean temperature change in abrupt4xCO2 and taking the intercept (Gregory et al., 2004; Gregory and Webb, 2008). Figure 1a shows a strong correlation (correlation coefficient  $r = 0.86$ ) between the value of  $\Delta S_0$  predicted by Equation 2 and the value that actually achieved the experiment's objectives, indicating that  $CO_2$  forcing and planetary albedo determine  $\Delta S_0$  to a first order (primarily forcing, since it varies much more between models than albedo does). However, for every model, the actual  $\Delta S_0$  is greater than those predicted by this theory, as has been noted by Schmidt et al. (2012) for a subset of four models. This underprediction is relevant from a scenario modeling standpoint, since Equation 1 was used by the modeling groups to create an initial guess for  $\Delta S_0$  (Kravitz et al., 2011a; Schmidt et al., 2012). Obtaining the correct value required running successive 10-year tuning runs of the GCMs until a net TOA radiation imbalance of less than  $0.1 \text{ W m}^{-2}$  was achieved.

One factor not accounted for by the initial guess formula is climate feedbacks. We can get a sense for how these might affect the required  $\Delta S_0$  by plotting it against equilibrium climate sensitivity (ECS), or the amount of global mean warming that

occurs due to a doubling of  $\text{CO}_2$ , the inter-model spread in which is mainly determined by feedbacks (Vial et al., 2013). Figure 1b shows that there is no correlation (correlation coefficient  $r = 0.02$ ) between these quantities. This makes sense because feedbacks are defined based on global mean temperature changes, which are zero by design (and close to zero in practice) in GeoMIP, assuming the feedbacks will, at least to a first order, work just as well to reverse a warming effect when an equal and opposite radiative forcing is applied. These results from GeoMIP corroborate those of Matthews and Caldeira (2007), who found that the required geoengineering forcing is independent of climate sensitivity in experiments with an ocean GCM coupled to a single-layer atmosphere.

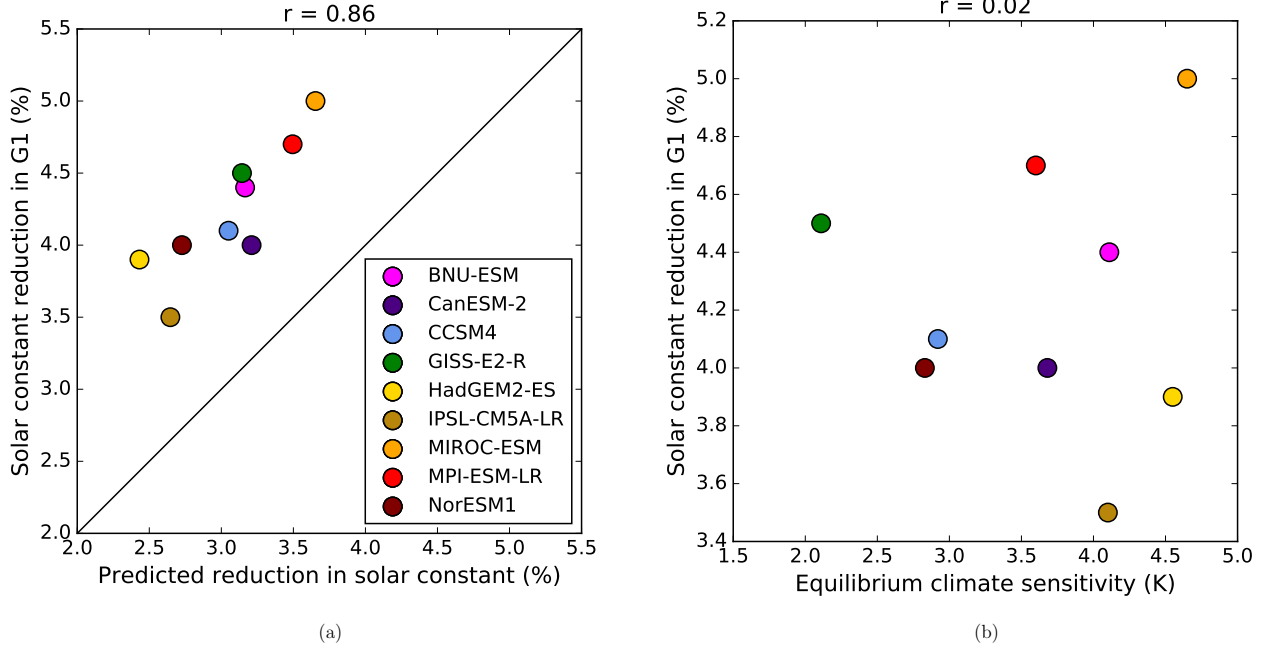

**Figure 1.** Percent solar constant reduction for models running the G1 experiment, versus (a) solar constant reduction predicted by Equation 2, based on effective radiative forcing values from Sherwood et al. (2014) and preindustrial planetary albedo values from Kravitz et al. (2013a), and (b) equilibrium climate sensitivity in the models, from Sherwood et al. (2014). CESM-CAM5.1-FV and CSIRO-Mk3L-1-2 are excluded from this figure because these models were not included in Sherwood et al. (2014).

If neither radiative forcings nor feedbacks can fully explain the variation in the required  $\Delta S_0$ , then we must turn to radiative adjustments that do not depend on global mean temperature changes. The effective  $\text{CO}_2$  radiative forcing in Equation 1 incorporates rapid adjustments of the atmosphere's temperature and humidity profiles, cloud properties, and surface albedo to the  $\text{CO}_2$  increase. However, such adjustments to the solar forcing are not accounted for. Effectively, Equation 1 calculates the solar constant reduction that would balance the instantaneous  $\text{CO}_2$  increase if atmospheric properties were allowed to adjust to the  $\text{CO}_2$  increase but not to the solar constant reduction. The consistent underestimation of the required  $\Delta S_0$  by Equation 1

indicates that atmospheric and surface adjustments in response to the combined CO<sub>2</sub> and solar instantaneous forcings have a greater net warming effect on the climate than such adjustments to the CO<sub>2</sub> forcing alone, requiring a greater reduction in the solar constant to restore the global mean temperature to preindustrial.

While we cannot calculate rapid adjustments to the solar forcing alone without a set of model runs in which only the solar constant is changed, we can use the G1 output to calculate radiative adjustments to the combined CO<sub>2</sub> and solar forcings, using existing analysis tools including the Approximate Partial Radiation Perturbation (APRP) method (Taylor et al., 2007) and radiative kernels (Soden et al., 2008; Shell et al., 2008). Assuming energy is conserved in the models and the analysis methods are reasonable accurate, it should be possible to use these calculated radiative adjustments explain the required solar constant reduction in G1, as expressed in the following equation:

$$\Delta S_0 = 4 \times \frac{F_{4\times\text{CO}_2,\text{inst}} + \sum \Delta R_X}{1 - \alpha} \quad (3)$$

where  $F_{4\times\text{CO}_2,\text{inst}}$  is the instantaneous radiative forcing from the CO<sub>2</sub> quadrupling, which is the change in OLR from the CO<sub>2</sub> increase when all atmospheric and surface properties are held constant (Hansen et al., 2005), and  $\Delta R_X$  represents the global mean TOA radiative adjustments to the combined forcings associated with various physical properties  $X$ , following the notation of Zhang and Huang (2014). Since there is no global mean temperature change in G1 by design (and approximately none in practice), we refer to the changes in TOA radiative balance resulting from changes in various physical properties of the atmosphere and surface as “adjustments” and not “feedbacks”. Note, however, that the changes in TOA radiation are in many ways dependent on local surface temperature changes, as discussed later.

This study examines changes in atmospheric temperature, specific humidity, cloud fraction, and surface albedo in G1, and quantifies the radiative effects of these changes in order to understand what determines the required  $\Delta S_0$  and why it is greater than that predicted using effective CO<sub>2</sub> forcing. We also explore the physical reasons for the changes in atmospheric properties, particularly cloud properties, which have been found to strongly affect meridional energy transport changes in G1, with implications for regional temperature and precipitation responses (Russotto and Ackerman, 2018). The changes in atmospheric properties, including clouds, are plotted and discussed in Section 2. Section 3 quantifies the radiative effects of these surface and atmospheric adjustments to the G1 forcing. Section 4 examines the global means of these adjustments to see which are most important in determining the required  $\Delta S_0$  according to Equation 3. In Section 5 we summarize our results and discuss implications for future research on geoengineering and solar climate forcings.

## 2 Changes in the physical state of the atmosphere

To understand the physical basis for the radiative adjustments calculated in later sections, in this section we show changes in atmospheric temperature, specific humidity, and cloud fraction that occur in the G1 experiment relative to preindustrial conditions. Throughout the paper we show averages over 40 year time periods: years 11-50 of the G1 simulation, to avoid incorporating transient effects that occur in the first ten years into averages, and years 1-40 of the piControl simulation, except where otherwise noted. Averaging over years 11-50 is standard procedure for analysis of the GeoMIP experiments (e.g. Kravitz

et al., 2013a); a longer averaging period would not be possible since most models stopped the experiment after 50 years. We treat the years 11-50 mean as equilibrium response, which seems appropriate since all components of the surface energy budget show little to no drift after the first 10 years (Kravitz et al., 2013b). We also plotted time series of the SW radiative adjustments calculated in Section 3 (Figure S13) and found no appreciable drift that would have extended beyond 50 years in any of the models.

Figure 2 shows the zonal mean temperature change for G1 minus piControl in each of the 11 models listed in Table 1. Several features common to all models are apparent. First, while the global mean surface air temperatures are all within 0.3 K of preindustrial (Table 1), all of the models exhibit surface cooling in the tropics and warming in the polar regions. This phenomenon has long been noted as a feature of climate model experiments with the G1 setup (e.g. Govindasamy et al., 2003; Kravitz et al., 2013a), and is due to the imposition of a net negative forcing in the tropics and a net positive forcing at the poles (Russotto and Ackerman, 2018). However, cooling dominates when considering the atmosphere as a whole. The tropical mid-to-upper troposphere cools more than the surface does, because the tropical temperature profile tends to follow a moist adiabat (e.g. Wetherald and Manabe, 1975), so that slight cooling at the surface leads to greater cooling aloft. The cooling of the tropical upper troposphere mirrors the effect that happens in global warming, where the upper troposphere warms more than the surface and emits more LW radiation, leading to a negative climate feedback known as the lapse rate feedback. In the case of G1, reduced LW emission from the atmospheric cooling has a warming effect on the planet; we quantify this effect using radiative kernels in Section 3.2.

Most models have an area of reduced cooling or even warming in the tropics near 100 hPa. This corresponds to the location of the tropical tropopause layer (TTL), an area in the tropics between about 70 and 150 hPa with properties of both the troposphere and stratosphere (Fueglistaler et al., 2009). The detailed vertical structure of temperature changes here may have to do with complex interactions between local temperature, humidity, and cloud properties. Another notable feature of the temperature change is the cooling of the stratosphere. An increase in carbon dioxide concentration cools the stratosphere, due to increased emission of LW radiation to space (Manabe and Wetherald, 1975), and a decrease in the solar constant also cools the stratosphere because it reduces the amount of ultraviolet radiation absorbed by ozone. The stratospheric cooling effect from the solar constant reduction is about an order of magnitude smaller than that from the CO<sub>2</sub> quadrupling (Govindasamy et al., 2003).

Figure 3 shows the change in the log of specific humidity between G1 and piControl in each model. We use a log scale because it makes it easier to visualize changes in specific humidity that occur over multiple orders of magnitude, and because log humidity changes are used in the water vapor radiative kernel calculations described in Section 3.2. Most of the troposphere becomes drier in G1 in all models, consistent with the large-scale cooling absent significant changes in relative humidity. Since water vapor is a strong greenhouse gas, this drying has a cooling effect on the planet, which we quantify in Section 3.2. Most models show moistening in the polar regions at low altitudes, consistent with the warming there, although the moistening is typically confined to smaller areas than the warming, indicative of a slight decrease in relative humidity at the poles (cf. Figure 5 of Smyth et al. (2017)). Interestingly, stratospheric water vapor decreases in most models, but it increases in the three models, BNU-ESM, CSIRO-Mk3L-1-2, and IPSL-CM5A-LR, that have warming in the TTL (albeit this moistening is mostly confined

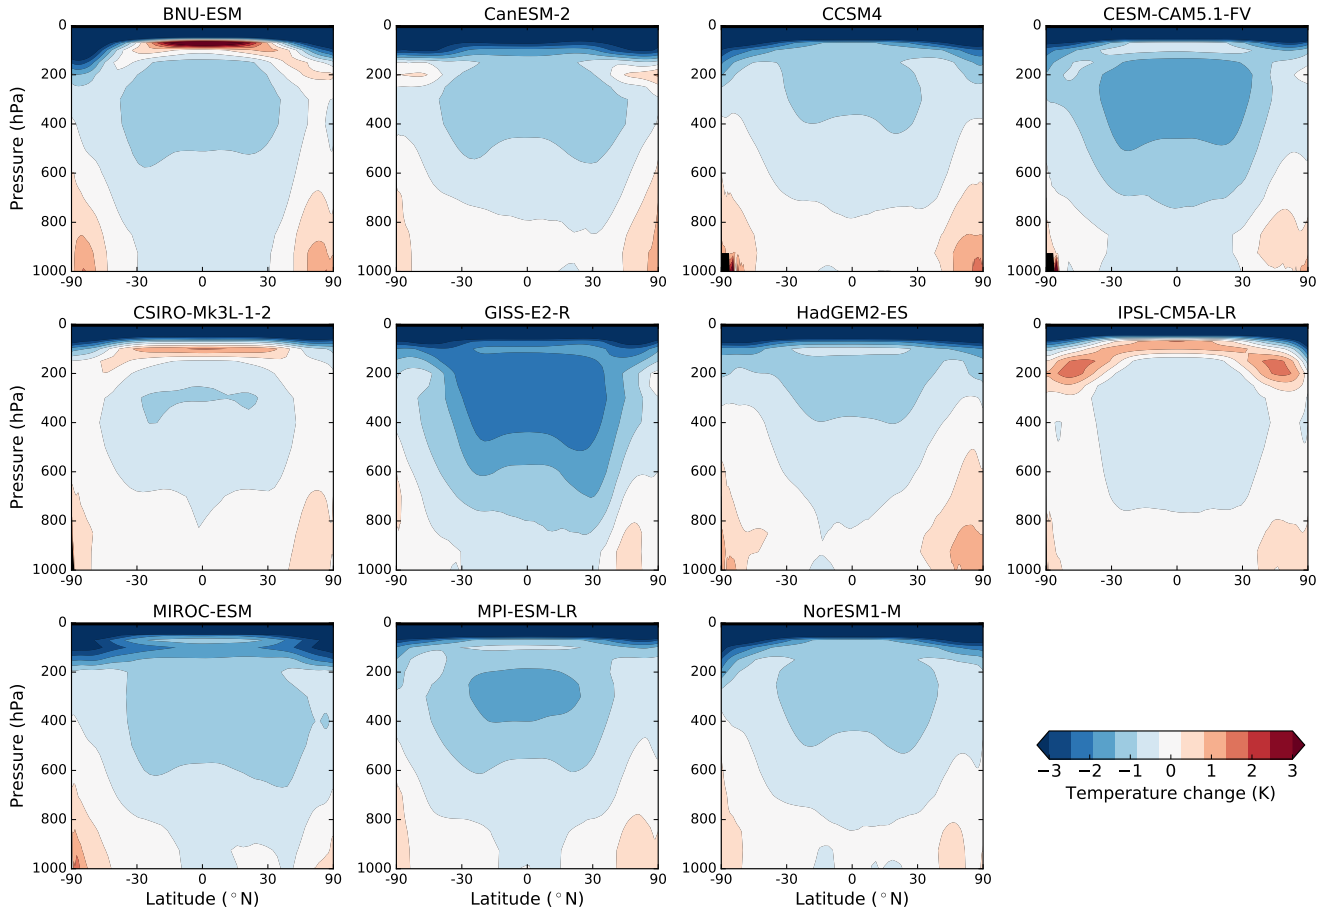

**Figure 2.** Zonal mean temperature change for G1 minus piControl in each model as a function of pressure.

to the northern hemisphere in the IPSL model). This is consistent with stratospheric humidity being set by temperatures in the TTL, through which air travels to reach the stratosphere as part of the Brewer-Dobson Circulation (e.g. Brewer, 1949; Newell and Gould-Stewart, 1981).

Figure 4 shows the zonal mean changes in cloud fraction in each of the models for G1 - piControl. Unlike atmospheric temperature and humidity, cloud fraction model output in CMIP5 and GeoMIP was archived on the native model vertical grid instead of a set of standardized pressure levels. Most of the GeoMIP models use hybrid sigma pressure coordinates, with the exceptions of GISS-E2-R, which uses pressure coordinates, and HadGEM2-ES, which uses hybrid sigma height coordinates. To enable direct comparisons with the temperature and humidity changes and radiative kernel calculations, we have regridded the cloud fraction output to the standard CMIP5 pressure levels, or to a fixed height grid for HadGEM2-ES. Conversion from hybrid sigma to pressure or height coordinates was done using a Python function (see "Code and data availability" below) based on the algorithm used in the "convert\_sigma\_to\_pres" Matlab function by Vimont, available at

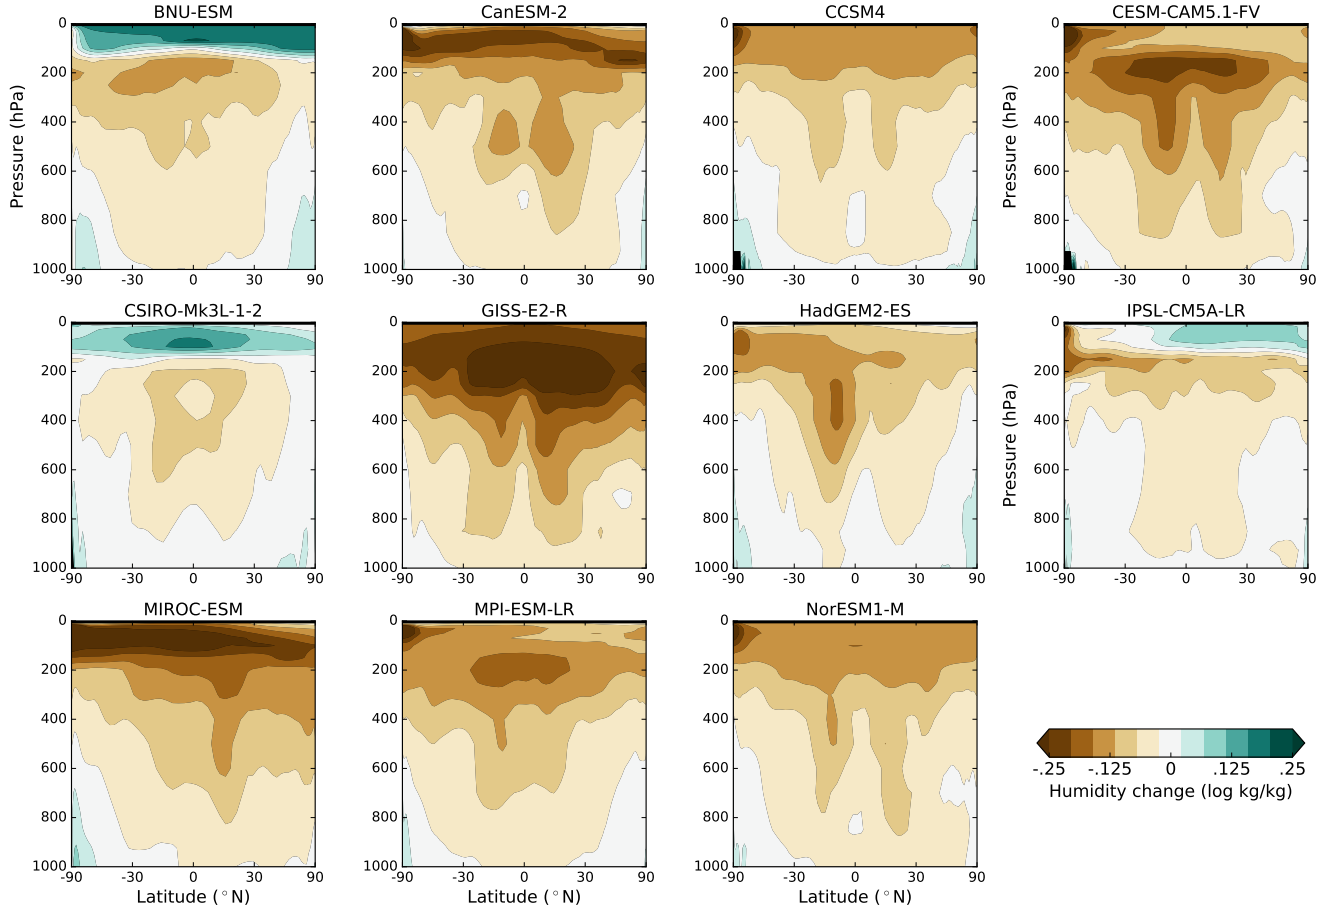

**Figure 3.** Zonal mean change in the natural log of specific humidity for G1 minus piControl in each model as a function of pressure.

<http://www.aos.wisc.edu/~dvimont/matlab/>. Since surface pressure output (required for the hybrid sigma pressure regridding) was only available for the last 50 years of the piControl simulation for CSIRO-Mk3L-1-2, we have used the last 40 years of this simulation as the control case for cloud fraction for this model, instead of the first 40 years.

In their study of four models running G1, Schmidt et al. (2012) noted that all four had a reduction in low cloud fraction, while high clouds had an inconsistent change. Figure 4 shows that an overall reduction of low cloud fraction occurs in all 11 models included in this study. For high clouds, we also find an inconsistent response, but overall high cloud fraction increases in most models. Some models, especially those in which the TTL warms (Figure 2), have a decrease in high cloud fraction in the TTL, and two of them, CSIRO-Mk3L-1-2 and IPSL-CM5A-LR, have an overall decrease in high cloud fraction. Since low clouds primarily have a cooling effect on the climate due to their strong SW reflection, a reduction in low clouds would result in a warming effect that would partially offset the cooling from solar geoengineering. An increase in high cloud fraction would also be expected to have a warming effect on the planet by reducing LW emission to space, although other variables,



**Figure 4.** Zonal mean change in cloud fraction for G1 minus piControl in each model as a function of pressure, or height for HadGEM2-ES. To help comparisons with other models, the vertical axis for HadGEM2-ES is scaled according to  $e^{-z/8000 \text{ m}}$  (where  $z$  is height), which is approximately proportional to pressure.

such as cloud height, are more important to the LW effect of cloud changes in global warming simulations (Zelinka et al., 2012b). We quantify the TOA SW and LW effects of the changes in cloud properties in Sections 3.1 and 3.2, respectively. In many models there is an increase in clouds in the stratosphere over Antarctica, likely due to the stratospheric cooling. Two models, HadGEM2-ES and MIROC-ESM, have a dipole in cloud fraction changes in the upper troposphere, corresponding to northward and southward shifts, respectively, of the intertropical convergence zone (ITCZ) in these models (Smyth et al., 2017; Russotto and Ackerman, 2018).

To get a sense of the zonally asymmetric spatial patterns of cloud fraction changes and to better understand areas of inter-model consensus and disagreement, we plot in Figure 5 maps of the multi-model mean changes in low, middle, and high cloud fraction for G1 - piControl. Within the ranges for low, middle, and high clouds, we assume random overlap between adjacent



**Table 2.** Global mean changes in low, middle and high cloud fraction in G1 minus piControl.

| Model            | Cloud fraction change (%) |        |       |
|------------------|---------------------------|--------|-------|
|                  | low                       | middle | high  |
| BNU-ESM          | -0.60                     | 0.26   | 0.91  |
| CanESM-2         | -1.59                     | -0.14  | 0.69  |
| CCSM4            | -1.54                     | -0.15  | 1.19  |
| CESM-CAM5.1-FV   | -1.51                     | 0.03   | 1.38  |
| CSIRO-Mk3L-1-2   | -0.71                     | -0.51  | -0.57 |
| GISS-E2-R        | -1.04                     | 0.13   | 1.34  |
| HadGEM2-ES       | -1.38                     | -0.19  | 0.44  |
| IPSL-CM5A-LR     | -0.74                     | 0.03   | -1.12 |
| MIROC-ESM        | -1.60                     | -0.02  | 0.76  |
| MPI-ESM-LR       | -1.03                     | -0.05  | 1.31  |
| NorESM1          | -1.63                     | -0.22  | 1.12  |
| Multi-Model Mean | -1.22                     | -0.08  | 0.68  |

layers of the common pressure grid. We use 680 hPa as the boundary between low and middle clouds and 440 hPa as the boundary between middle and high clouds, following the standards for the International Satellite Cloud Climatology Project (ISCCP; see Figure 2 of Rossow and Schiffer (1999)), or 3250 m and 6500 m in the case of HadGEM2-ES, which roughly correspond to these pressure levels in the 1976 Standard Atmosphere (NOAA, 1976). These plots, and all subsequent multi-model mean maps, show stippling where fewer than all but 2 of the included models agree on the sign of the change, so that unstippled areas indicate robust changes. Since this agreement could happen by chance in isolated areas, we focus on areas with apparent spatial structure or a physical reason why we might expect a change. For all multi-model mean maps, corresponding maps for each of the individual models are available in the Supplemental Information. Global mean cloud fraction changes for the individual models are shown in Table 2.

The reduction in low cloud fraction (Figure 5a) is widespread, occurring over most ocean areas except for regions close to the equator and poles, and over most non-desert land areas. Middle clouds (Figure 5b) have fewer areas with robust changes, but there is a reduction in the cloud fraction on either side of the equator over the Atlantic and Pacific and over the equatorial Indian ocean. This may be related to a narrowing of the annual mean tropical precipitation maximum (see Fig. 5 of Tilmes et al., 2013), which may be due in part to a reduction in the seasonal migration of the ITCZ (Smyth et al., 2017). For high clouds (Figure 5c), there are few areas with robust changes, but there is a notable increase in high clouds over the equator, in some subtropical regions (around 30° N and S), and over the poles, particularly Antarctica. Figure 4 shows that the high cloud increases over the poles are mostly in the stratosphere.

Without additional experiments varying potential drivers of cloud changes, it is difficult to prove definitively the causes for the changes in cloud fraction. However, it is possible to gain some insight into the reasons for changes in low cloud

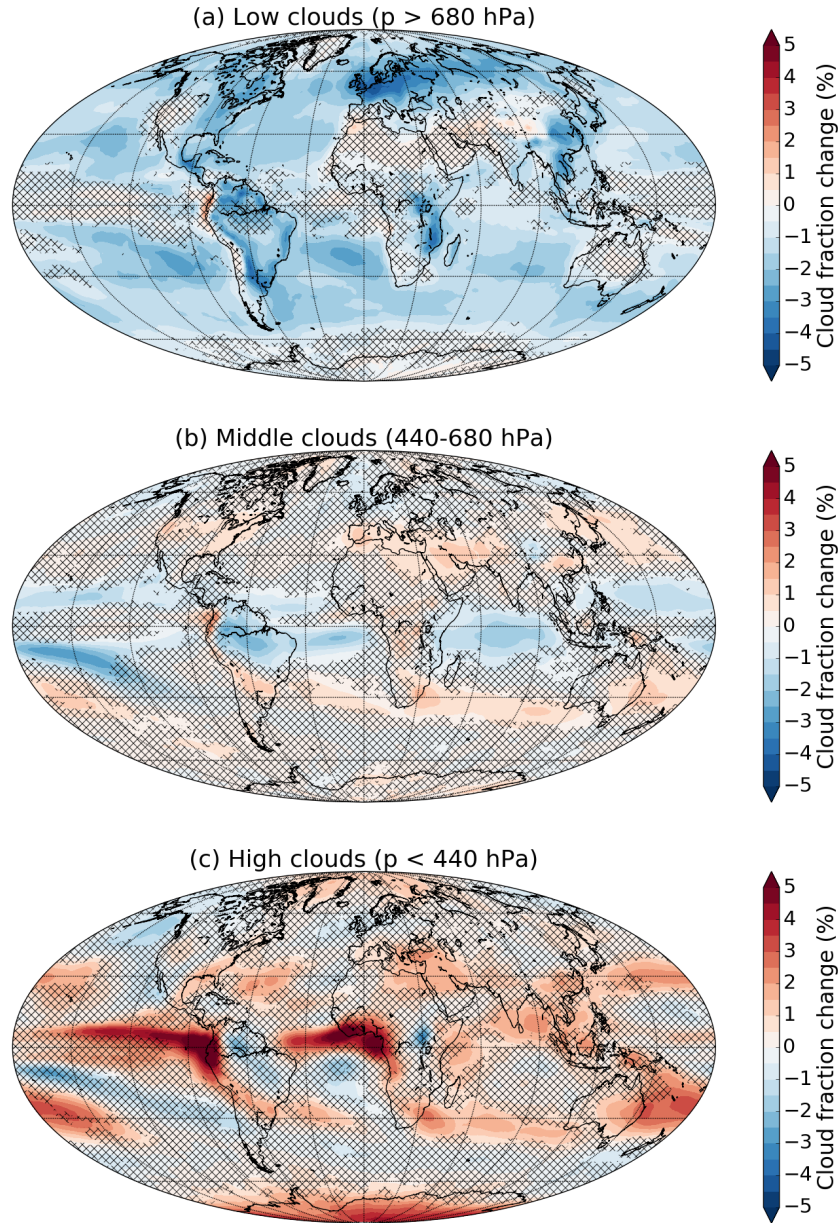

**Figure 5.** Multi-model mean changes in low (a), middle (b) and high (c) cloud fraction for G1 - piControl. Hatching indicates areas where fewer than 9 of the 11 models agree on the sign of the change.

fraction over the ocean by plotting several variables that are correlated with low cloud fraction in observations. These include lower-tropospheric stability (LTS), defined as the difference in potential temperature between 700 hPa and the surface (Klein



**Figure 6.** Multi-model mean changes in EIS (a) and LTS (b) for G1 - piControl. Hatching indicates areas where fewer than 7 of 9 models agree on the sign of the change. CSIRO-Mk3L-1-2 and MPI-ESM-LR models are excluded from this plot because near-surface specific humidity output, which is required to calculate EIS, was not available.

and Hartmann, 1993), and estimated inversion strength (EIS), a metric of the temperature inversion at the top of the marine boundary layer. EIS is defined as (Wood and Bretherton, 2006, Eq. 4):

$$\text{EIS} = \text{LTS} - \Gamma_m^{850} (z_{700} - \text{LCL}) \quad (4)$$

where  $\Gamma_m^{850}$  is the moist adiabatic lapse rate at 850 hPa,  $z_{700}$  is the height of the 700 hPa surface, and LCL is the lifting  
 5 condensation level.

Figure 6 shows the changes in EIS (a) and LTS (b) for G1 - piControl. Both of these quantities generally decrease across most of the ocean, except for some regions centered near 15° N and S. The reduction in EIS is generally smaller than the reduction in LTS (due to the correction for the moist adiabatic temperature profile), but is still widespread. A reduction of the strength of the inversion at the top of the boundary layer would be expected to reduce low cloud fraction by encouraging  
 10 mixing of dry air into the boundary layer, so the reduction in EIS over the ocean is a likely explanation for the reduction in low

cloud fraction there. Stability metrics are included in low cloud fraction schemes in many models, and those that use the Slingo (1987) scheme, such as CCSM4 and NorESM1-M, have an explicit dependence of low cloud fraction on stability. However, the robustness of the reduction in low cloud fraction in G1 indicates that it is not the result of the idiosyncrasies of any one cloud fraction scheme.

5 Besides changes in stability metrics, other factors that have been suggested as explaining changes in marine stratocumulus cloud fraction under global warming conditions in large-eddy simulation models include reduced LW radiative cooling from cloud tops due to increased CO<sub>2</sub> and H<sub>2</sub>O concentrations; decreased subsidence above the boundary layer; and increased sea surface temperatures (Bretherton, 2015). Qu et al. (2014) analyzed changes in marine stratiform cloud fraction in CMIP3 and CMIP5 global warming experiments, and found a reduced low cloud fraction in most models, which they attributed to an  
10 increase in sea surface temperature (SST). While EIS increased in the global warming experiments, which would promote increased cloud fraction, this was not enough to compensate for the SST increase. In G1, SST changes little (and in fact decreases slightly in the tropics and subtropics (Hong et al., 2017, Fig. 1)), leaving EIS to dominate changes in low cloud fraction over the ocean.

It does not appear that cloud top radiation or subsidence could be responsible for the widespread low cloud reduction, for the  
15 following reasons. The mechanism of reduced LW radiative cooling from cloud tops would be much weaker for G1 than for global warming if at all present because, while CO<sub>2</sub> concentrations have increased, water vapor concentrations have decreased; also, the reduction in insolation further reduces the net radiative cooling rate via its direct SW effect. We have not tried to quantify how these fluxes have changed in G1 since LW radiative fluxes at the top of the boundary layer were not included in the GeoMIP model output archive. We might expect that subsidence would change due to the effects of the combined CO<sub>2</sub> and  
20 solar forcings on the atmospheric radiative cooling profile. However, meridional stream function anomaly plots for G1 minus piControl (Smyth et al., 2017; Guo et al., 2018) show that while some areas have anomalous subsidence, others have anomalous rising motion, and these regions are not consistent between models or with the regions of low cloud fraction decrease. Large-eddy simulation experiments involving a CO<sub>2</sub> increase and insolation reduction could help better understand what role, if any, these processes play in the changes in low cloud fraction in the G1 scenario, as well as the role of any changes in boundary  
25 layer or free troposphere relative humidity not associated with any of the processes discussed here.

Qu et al. (2014) attribute the increase in EIS in global warming experiments to greater surface warming over the continents and the tropical western Pacific warm pool relative to the rest of the ocean; the warmed air is then advected over the tops of the marine stratocumulus fields. However, a reverse version of this mechanism does not seem to be at work in G1 because cooling is more robust over the ocean than over land (Kravitz et al., 2013a, Figure 2). It is also important to keep in mind that there are  
30 different metrics of stability that are useful for different parts of the atmosphere and for different types of clouds. Kravitz et al. (2013b) argued that any cloud cover changes in G1 would be due in part to increases in atmospheric stability, but in our study it appears to be a decrease in stability that is most relevant to the low cloud reduction. Another metric of stability, the rate of increase of equivalent potential temperature  $\theta_e$  with height, does in fact increase in G1 relative to piControl, as shown in Figure 8 of Kravitz et al. (2013a). So, even as the atmosphere has gotten less stable in G1 with respect to boundary layer turbulence,  
35 it has gotten more stable with respect to deep convection, at least to the extent to which  $\frac{\partial \theta_e}{\partial z}$  is a predictor of changes in deep

convection, as assumed by Kravitz et al. (2013a). To better understand the reasons for the changes in clouds, it would be useful to further investigate the effects of CO<sub>2</sub> and solar forcings on potential and equivalent potential temperature profiles.

Over land, existing research suggests that the reduction in low cloud fraction in G1 is a result of the physiological responses of plants to increased CO<sub>2</sub>, as represented in the models' dynamic vegetation schemes. Cao et al. (2010) ran GCM simulations in which the CO<sub>2</sub> concentrations experienced by plants were doubled while the radiative fluxes were held constant, and found that low cloud fraction decreased in many vegetated land areas (see their Figure 1, central panel). The low cloud fraction decrease in the Cao et al. study is strongest in South America, eastern North America, southeast Asia, southeast Africa, and western Europe, which are the same areas of reduced low cloud cover in G1. The mechanism is that, when CO<sub>2</sub> concentrations are higher, plants' stomata do not need to open as much to take in the same amount of CO<sub>2</sub>, leading to less transpiration of water from the plants (Field et al., 1995). This causes a reduction in near-surface relative humidity over land, seen in both Cao et al. (2010, Figure 2) and G1 (Smyth et al., 2017, Figure 5), which reduces the cloud fraction. In addition to plant physiology, it is possible that some of the reduction in relative humidity and cloud fraction over land in G1 is due to a reduction in evaporation directly caused by the reduction in surface SW radiation. The balance between these two quantities explains the reduction in global mean precipitation in G1 (Kravitz et al., 2013b), since precipitation must balance evaporation, suggesting that a similar mechanism may affect cloud fraction. Over the ocean, however, near-surface relative humidity increases in G1 in most areas, despite the reduction in evaporation (Smyth et al., 2017), implying that evaporation changes are not the reason for the low cloud changes there.

### 3 Radiative effects

#### 3.1 SW radiative effects

To calculate the SW radiative effects of changes in clouds and other atmospheric and surface properties, we use the APRP method introduced by Taylor et al. (2007), which is based on a single-layer radiative transfer model of the atmosphere that can be expressed analytically and requires as inputs only the monthly mean surface and TOA radiative fluxes and total column cloud fraction outputs from the GCMs. APRP shows the radiative effects of physical changes in clouds, accounting for cloud masking effects, in which the differences between clear-sky and all-sky fluxes change in response to forcing without changes in the clouds themselves. The calculations shown here have previously been used as inputs to energy balance model simulations to understand the effects of changes in clouds and surface albedo on atmospheric energy transport in G1 (Russotto and Ackerman, 2018).

Figure 7 shows the multi-model mean change in net downward SW radiative flux at the TOA due to changes in clouds (Figure 7a), non-cloud atmospheric scattering and absorption (Figure 7b), and surface albedo (Figure 7c), calculated using APRP. Global mean radiative adjustments for the individual models in the SW and LW are shown in Table 3, which will be referred to in the discussion of the required solar forcing in G1 in Section 4. Clouds generally have a robust and widespread warming effect in the SW, in locations that closely correspond to the areas of reduced low cloud fraction shown in Figure 5a. The non-cloud atmosphere effects are very weak by comparison in the multi-model mean, but there are several models with





**Figure 7.** Multi-model mean change in net downward SW radiation at the TOA in G1 - piControl due to changes in cloud properties (a), non-cloud atmospheric absorption and scattering (b), and surface albedo (c), calculated using APRP method (Taylor et al., 2007). Hatching indicates areas where fewer than 7 of 9 models agree on the sign of the change. CSIRO-Mk3L-1-2 and GISS-E2-R models are excluded because not all fields necessary for APRP were correctly archived.

**Table 3.** Global mean radiative adjustments in G1 minus piControl, and excess and total solar forcing in G1, in  $\text{W m}^{-2}$ . Positive values indicate a warming effect (increase in absorbed SW radiation or decrease in OLR), except for solar forcing where positive values represent a cooling. SW adjustments correspond to multi-model means plotted in Figure 7. LW adjustments correspond to multi-model means plotted in Figures 8 and 9, with sign flipped for Figure 8. “Sum” is the sum of all the SW and LW adjustments.  $F_{\text{excess}}$  is calculated using Equation 6 and represents the actual instantaneous solar forcing ( $F_{\text{solar}}$ ) in G1 minus that which would match the  $\text{CO}_2$  effective or instantaneous forcing.  $F_{\text{solar}}$  represents the total instantaneous solar forcing calculated from theory (Equation 8) or actually used in G1 (Equation 9).

| Model            | SW adjustments |           |         | LW adjustments |       |                      |       | Sum  | $F_{\text{excess}}$ |       | $F_{\text{solar}}$ |        |
|------------------|----------------|-----------|---------|----------------|-------|----------------------|-------|------|---------------------|-------|--------------------|--------|
|                  | cloud          | non-cloud | surface | $T_a$          | $T_s$ | $\text{H}_2\text{O}$ | cloud |      | Eff.                | Inst. | theory             | actual |
| BNU-ESM          | 1.36           | 0.05      | 0.51    | 2.94           | 0.08  | -0.78                | -0.08 | 4.08 | 2.95                | —     | —                  | 10.51  |
| CanESM-2         | 1.44           | 0.41      | -0.04   | 3.03           | 0.07  | -1.04                | -0.26 | 3.60 | 1.90                | 4.00  | 9.20               | 9.60   |
| CCSM4            | 2.09           | -0.05     | 0.28    | 2.53           | -0.08 | -0.84                | 0.13  | 4.05 | 2.55                | 4.44  | 9.56               | 9.95   |
| CESM-CAM5.1-FV   | 0.71           | -0.09     | 0.87    | 3.94           | 0.18  | -1.39                | 0.30  | 4.52 | —                   | —     | —                  | 11.26  |
| CSIRO-Mk3L-1-2   | —              | —         | —       | 2.16           | 0.03  | -0.52                | -0.24 | —    | —                   | —     | —                  | —      |
| GISS-E2-R        | —              | —         | —       | 4.88           | 0.21  | -1.78                | -0.07 | —    | —                   | —     | —                  | 10.79  |
| HadGEM2-ES       | 1.05           | 1.07      | 0.50    | 2.66           | -0.05 | -0.87                | -0.15 | 4.21 | 3.56                | 3.91  | 9.76               | 9.46   |
| IPSL-CM5A-LR     | 1.32           | 1.21      | 0.15    | 2.08           | -0.05 | -0.52                | -0.86 | 3.35 | 2.01                | 3.85  | 7.75               | 8.25   |
| MIROC-ESM        | 3.29           | 0.06      | 0.02    | 3.44           | 0.10  | -1.11                | -0.58 | 5.22 | 3.15                | —     | —                  | 11.69  |
| MPI-ESM-LR       | 2.63           | -0.00     | 0.17    | 3.41           | 0.07  | -1.10                | -0.54 | 4.63 | 2.86                | —     | —                  | 11.16  |
| NorESM1          | 2.07           | -0.20     | 0.05    | 2.88           | 0.08  | -0.97                | -0.10 | 3.82 | 3.00                | 3.87  | 9.34               | 9.42   |
| Multi-Model Mean | 1.77           | 0.27      | 0.28    | 3.09           | 0.06  | -0.99                | -0.22 | 4.16 | 2.75                | 4.01  | 9.12               | 10.21  |

appreciable positive values for this adjustment. Maps of this adjustment for the individual models (Figure S7) show that for HadGEM2-ES, it appears to be related to a reduction in atmospheric dust, since most of the warming effect occurs over and downwind of deserts; in IPSL-CM5A-LR, the effect is relatively spatially uniform but slightly stronger in higher latitudes. For surface albedo, there are warming effects in high latitudes from decreases in sea ice and snow cover associated with the residual polar warming in G1. There are also some warming effects in lower latitudes near desert regions, such as in the Sahel region; this may have to do with vegetation effects. There are several small regions, such as Tibet, with increases in surface albedo, presumably due to increased snow cover as a result of surface cooling there (*cf.* Figure 2 of Kravitz et al. (2013a)). Surface albedo effects are strong in some locations, such as the Sea of Okhotsk, but the relatively small area over which surface albedo changes can occur limits their importance in the global mean.

### 10 3.2 LW radiative effects

The technique of radiative kernels (Held and Soden, 2006; Soden et al., 2008; Shell et al., 2008) was developed to quantify LW radiative adjustments and feedbacks using standard monthly mean climate model output. These kernels consist of matrices



of the partial derivatives of OLR with respect to changes in surface temperature, atmospheric temperature, specific humidity, and greenhouse gas concentration as a function of latitude, longitude, month and (where applicable) pressure, calculated using offline calculations with a particular GCM's radiative transfer code. Radiative kernels have been developed based on a variety of GCMs, including GFDL AM2 (Soden et al., 2008), CAM3 (Shell et al., 2008), MPI-ESM-LR (Block and Mauritsen, 2013), and CESM-CAM5 (Pendergrass et al., 2018).

We have applied the Shell et al. (2008) radiative kernels to the G1 ensemble. The choice of model used to generate the kernels has been shown to have little effect on the results (Soden et al., 2008). After regridding the kernels to the latitude and longitude grid of each GCM, we multiplied them by the changes in temperature and the log of specific humidity, normalized by the standard anomaly used to compute the kernels (1 K for the surface and atmospheric temperature kernels, and the change in log specific humidity associated with a 1 K warming at constant relative humidity for the water vapor kernel), in order to compute the change in OLR associated with the changes in each of these quantities for G1 - piControl. We summed the OLR changes from each vertical level in order to get overall radiative adjustments from column temperature and water vapor changes, and we used the annual mean of the monthly results for our analysis.

Figure 8 shows multi-model mean changes in OLR for G1 - piControl calculated from the atmospheric temperature (a), surface temperature (b), and water vapor (c) kernels. Global means for the individual models are shown in Table 3. For the atmospheric temperature kernel, there is a strong decrease in OLR that is widespread across the globe and robust across models. This is associated with the cooling of the atmosphere and reduced longwave emission (*cf.* Figure 2). The reduction in OLR is stronger in the tropics than in the polar regions, and is due to some combination of upper tropospheric and stratospheric cooling. We discuss the contribution of the stratospheric component in the next section. Surface temperature changes have little effect on the TOA LW radiation balance, but there is a reduction in OLR in the tropics and subtropics and an increase in the polar regions that is consistent across models, due to the patterns of tropical cooling and polar warming at the surface. The OLR change from the surface temperature kernel is much smaller than that for atmospheric temperature because the atmosphere is not very transparent to LW radiation in most wavelengths, and because temperature changes are smaller at the surface than in the upper troposphere and stratosphere. Changes in water vapor concentration cause a robust increase in OLR that partially offsets the decrease in OLR from the atmospheric temperature kernel. The water vapor concentration decreases in the upper troposphere (Figure 3), which increases LW emission to space by lowering the effective altitude of emission.

In addition to the quantities plotted in Figure 8, radiative kernels can also be used to calculate the effect of changes in cloud properties on OLR. This is often measured according to the change in the cloud radiative effect (CRE), which is the difference in OLR in clear-sky minus all-sky averages. However, changes in the cloud radiative effect may include cloud masking effects. We can correct the change in LW CRE for the effects of existing clouds on clear-sky fluxes using the difference in flux changes calculated according to clear-sky and all-sky kernels, following Shell et al. (2008):

$$\begin{aligned} \Delta \text{LWCRE}_{\text{adjusted}} = & \text{LWCRE}_{\text{G1}} - \text{LWCRE}_{\text{piControl}} \\ & + (\Delta \text{OLR}_{k,T} - \Delta \text{OLR}_{k,T,\text{clear}} + \Delta \text{OLR}_{k,T_s} - \Delta \text{OLR}_{k,T_s,\text{clear}} \\ & + \Delta \text{OLR}_{k,q} - \Delta \text{OLR}_{k,q,\text{clear}} + \Delta \text{OLR}_{k,\text{CO}_2} - \Delta \text{OLR}_{k,\text{CO}_2,\text{clear}}) \end{aligned} \quad (5)$$



**Figure 8.** Multi-model mean change in OLR in G1 - piControl due to changes in atmospheric temperature (a), surface temperature (b), and specific humidity (c), calculated using radiative kernels (Shell et al., 2008). Hatching indicates areas where fewer than 9 of 11 models agree on the sign of the change.

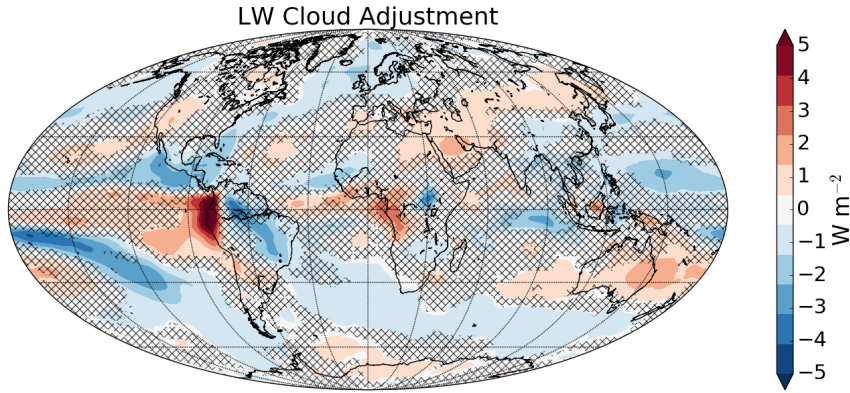

**Figure 9.** Multi-model mean change in LW cloud radiative effect in G1 - piControl, corrected for cloud masking of LW air temperature, surface temperature and water vapor adjustments and CO<sub>2</sub> forcing. Positive values indicate a decrease in OLR, *i.e.* a warming effect. Hatching indicates areas where fewer than 9 of 11 models agree on the sign of the change.

where, in the subscripts,  $k$  denotes a change in OLR calculated using a kernel, clear denotes quantities calculated using the clear-sky instead of all-sky kernels,  $T$  is atmospheric temperature,  $T_s$  is surface temperature, and  $q$  is specific humidity. Since the Shell et al. (2008) CO<sub>2</sub> forcing kernels were for a doubling of CO<sub>2</sub>, we doubled these kernels to obtain the radiative flux changes for a CO<sub>2</sub> quadrupling.

- 5 Figure 9 shows the multi-model mean change in LW CRE calculated using Equation 5. There is a modest cooling effect in the global, multi-model mean (see also Table 3), but there are some places where there is a robust warming effect. The strongest warming effects occur near the eastern equatorial oceans, where the increase in high cloud fraction is greatest, while the strongest cooling effects occur in two belts in the eastern Pacific, which are associated with robust decreases in low and middle cloud fraction (*cf.* Figure 5). There are also widespread cooling effects over the mid-latitude oceans, where low cloud
- 10 fraction decreases. Generally, an increase in high cloud fraction would be expected to result in a warming effect, because high clouds are much cooler than the surface and are more effective at trapping LW radiation. However, in the case of G1, it appears that the LW effect of the decrease in low cloud fraction compensates for this, despite the cloud temperature being closer to the surface temperature, because the low cloud reduction occurs over a wide area. The spatial correspondence of areas of strong cooling effects in Figure 9 to areas of strong low cloud fraction decrease in Figure 5a supports this view. Besides cloud
- 15 fraction, LW radiation is also sensitive to changes in cloud height and cloud optical depth (Zelinka et al., 2012b). It may be that the global mean increase in high cloud fraction that occurs in most models has a limited effect on OLR because the new clouds being formed are optically thin; we would especially expect this in the case of polar stratospheric clouds. The radiative effects of changes in cloud optical thickness are difficult to assess from the GeoMIP output currently available. These effects have been quantified in global warming simulations using cloud radiative kernels (Zelinka et al., 2012a), but the use of these
- 20 requires cloud fraction statistics binned by optical depth and cloud top height produced by the ISCCP satellite simulator (Klein and Jakob, 1999; Webb et al., 2001) that is part of the CFMIP Observation Simulator Package (Bodas-Salcedo et al., 2011). The

simulator must be run inline with each GCM, or else requires instantaneous cloud fraction output (rather than monthly means) in order to be run retrospectively. The necessary outputs for cloud radiative kernels were saved in the Cloud Feedback Model Intercomparison Project (CFMIP; Bony et al., 2011) but not in GeoMIP. It would be useful to follow the CFMIP protocols in future GeoMIP experiments in order to allow further quantitative analysis of the changes in clouds that occur under combined SW and LW forcings.

#### 4 Connections between radiative effects and required solar reduction

Having quantified the radiative effects of changes in the physical properties of the atmosphere and surface in G1, we now revisit the question of the amount of solar constant reduction required to offset the quadrupling of CO<sub>2</sub>. The solar constant reduction predicted based on effective CO<sub>2</sub> radiative forcing (Equation 1) systematically underestimated the actual reduction required (Figure 1b). In this section we attempt to account for this discrepancy by comparing the amount of extra solar forcing needed with the global means of the radiative adjustments calculated in Section 3. This comparison is shown in Figure 10 for the 8 models for which effective radiative forcing values from Sherwood et al. (2014) were available and all of the radiative adjustments could be calculated. The excess required solar reduction,  $F_{\text{excess}}$ , shown in black, is calculated according to:

$$F_{\text{excess}} = (\Delta S_0(\%)_{\text{actual}} - \Delta S_0(\%)_{\text{predicted}}) \times \frac{1361 \text{ W m}^{-2}}{100\%} \times \frac{1 - \alpha}{4} \quad (6)$$

where  $\Delta S_0(\%)_{\text{actual}}$  is listed in Table 1 and  $\Delta S_0(\%)_{\text{predicted}}$  is calculated using Equation 2. In terms of radiative forcing,  $F_{\text{excess}}$  is the difference between the actual solar forcing required in G1 and the effective forcing from the CO<sub>2</sub> quadrupling.

The relative sizes of the bars in Figure 10 are fairly similar across models. The strongest warming effect is generally from the LW atmospheric temperature adjustment, followed by the SW cloud adjustment. The only consistent cooling effect comes from the LW water vapor adjustment. Surface albedo effects are generally small, as is the SW clear-sky adjustment, with the exceptions discussed in Section 3.1. The LW surface temperature adjustment is practically negligible in all models, while the LW cloud adjustment is also small but has an inter-model range of about 1 W m<sup>-2</sup>. The model with the greatest cooling effect from the LW cloud adjustment, IPSL-CM5A-LR, is the model with the greatest global mean decrease in high cloud fraction, whereas most other models have an increase in high cloud fraction (Table 2).

Comparing the black and gray bars in Figure 10 shows that the sum of all the global mean radiative adjustments more than accounts for the additional solar constant reduction required to balance the CO<sub>2</sub> quadrupling, compared to the amount predicted by Equation 1. The fact that the sum of the radiative adjustments consistently overestimates  $F_{\text{excess}}$  points to the fact that this is not really a fair comparison. Rapid adjustments to a CO<sub>2</sub> quadrupling by itself, which were included in the calculation of effective CO<sub>2</sub> radiative forcing, are being double-counted, because they also show up in the radiative adjustments to the G1 combined forcing, to the extent that they are not canceled by the solar reduction.

To account for this, we plot in Figure 11 the same quantities as in Figure 10 but where the black bars are calculated using instantaneous rather than effective CO<sub>2</sub> forcing for the predicted solar constant reduction (*i.e.* using  $F_{4\times\text{CO}_2,\text{inst}}$  rather than  $F_{4\times\text{CO}_2,\text{eff}}$  in Equation 2 and then substituting into Equation 6). Expressed mathematically, the comparison done in Figure 11



**Figure 10.** Excess required solar radiative forcing in G1 vs. that expected from effective CO<sub>2</sub> forcing (black bar), global mean SW and LW radiative adjustments (colored bars), and sum of all the radiative adjustments (gray bar), in models for which all of these quantities were calculated. For all except  $F_{\text{excess}}$ , positive values indicate a warming effect (increase in absorbed SW radiation or reduction in OLR). The first three colored bars correspond to the SW radiative adjustments calculated using APRP (multi-model mean maps shown in Figure 7). The three blue and green bars correspond to the LW radiative adjustments calculated using radiative kernels (multi-model mean maps shown in Figure 8). The magenta bar corresponds to the change in LW cloud radiative effect, corrected for cloud masking effects using radiative kernels (multi-model mean map shown in Figure 9).

is:

$$\left( (\Delta S_0(\%)_{\text{actual}}) \times \frac{1361 \text{ W m}^{-2}}{100\%} - 4 \times \frac{F_{4\times\text{CO}_2, \text{inst}}}{1 - \alpha} \right) \times \frac{1 - \alpha}{4} \stackrel{?}{=} \sum \Delta R_X . \quad (7)$$



**Figure 11.** As in Figure 10 but with excess solar forcing calculated using instantaneous instead of effective  $CO_2$  radiative forcing. Navy blue bar indicates the reduction in OLR due to stratospheric temperature adjustment from  $CO_2$  quadrupling given by Zhang and Huang (2014), to illustrate the portion of the atmospheric temperature adjustment to G1 attributable to stratospheric cooling.

The black bars in Figure 11 show the left hand side of the Equation 7 while the gray bars show the right hand side. If the two bars are the same size, that means that the actual solar constant reduction matches that from Equation 3.

Instantaneous forcing, unlike effective forcing, cannot be calculated from monthly mean model output through a simple linear regression of TOA flux changes against surface temperature; instead it requires running each GCM’s radiative transfer code offline with standard and quadrupled  $CO_2$  concentrations. For this reason, estimates of instantaneous  $CO_2$  forcing are available for fewer models than for effective forcing. We used the “double call” instantaneous forcing estimates from the CMIP5 archive shown in Chung and Soden (2015) for the CanESM-2 and IPSL-CM5A-LR models. For three other models (CCSM4, HadGEM2-ES, and NorESM1-M), we use estimates of instantaneous  $CO_2$  forcing given by Zhang and Huang (2014) based on residuals between total TOA flux changes and radiative responses calculated with radiative kernels.

In Figure 11, the black and gray bars match to within about 10%, indicating that the theory expressed in Equation 3 works well for explaining the amount of solar constant reduction required to balance a  $CO_2$  increase. Since the equation must be true given energy conservation, this agreement demonstrates that the approximate methods used to calculate the radiative adjustments work well in the context of G1. In evaluating this agreement, it is useful to express Equation 3 in terms of total

instantaneous solar forcing rather than solar constant reduction:

$$F_{\text{solar,theory}} = F_{4\times\text{CO}_2,\text{inst}} + \sum \Delta R_X \quad (8)$$

and compare it to the actual solar forcing in G1:

$$F_{\text{solar,actual}} = \Delta S_{0,\text{actual}}(\%) \times \frac{1361 \text{ W m}^{-2}}{100\%} \times \frac{1 - \alpha}{4} . \quad (9)$$

- 5 These values are listed in the last two columns of Table 3. The errors in the total solar forcing in G1 obtained from Equation 8 are all within  $0.5 \text{ W m}^{-2}$ , or within about 6% of the total, indicating that the instantaneous solar forcing required to balance an abrupt  $\text{CO}_2$  increase is well explained by the sum of the instantaneous  $\text{CO}_2$  forcing and the radiative adjustments to the combined forcings.

The two largest radiative adjustments to the G1 forcing scenario are the LW atmospheric temperature adjustment and the  
 10 SW cloud adjustment. Since the temperature adjustment contains effects of both stratospheric and tropospheric temperature changes, it is worth trying to understand the partitioning between these effects. We have overlaid the OLR reduction due to the stratospheric cooling in abrupt4x $\text{CO}_2$  given by Zhang and Huang (2014) onto the  $\Delta T$  (atmosphere) bar in Figure 11. This OLR reduction is the stratospheric adjustment to the  $\text{CO}_2$  forcing, shown in Figure 2b of Hansen et al. (2005). The overlay shows that between about 50% to 75%, depending on the model, of the atmospheric temperature radiative adjustment in G1 is due to  
 15 cooling of the stratosphere by the increase in  $\text{CO}_2$ . The rest is due to a combination of the additional cooling of the stratosphere from the reduction in insolation and the cooling of the upper troposphere which arises from the surface cooling in the tropics. The water vapor adjustment roughly compensates for the tropospheric component of the temperature adjustment, and these effects are physically linked because a cooler atmosphere emits less LW radiation but also contains less water vapor to absorb radiation from below. Therefore, the main reasons why the instantaneous solar forcing must be greater than the instantaneous  
 20  $\text{CO}_2$  forcing in order to maintain energy balance are the failure to undo the stratospheric cooling and the reduction in low cloud fraction.

## 5 Conclusions

This paper characterizes the physical responses of the atmosphere and surface to the GeoMIP G1 scenario and quantifies their radiative effects, with the goal of explaining what determines the solar constant reduction required to balance the  $\text{CO}_2$   
 25 increase. At the surface, the tropics cool and the poles warm while global mean temperature remains at preindustrial. The upper troposphere experiences cooling at all latitudes, with the tropical upper troposphere cooling more than the surface. The stratosphere cools more than anywhere else in the atmosphere, due primarily to the  $\text{CO}_2$  increase (Govindasamy et al., 2003). The tropospheric temperature effect is a reversal of the negative lapse rate feedback that happens in global warming simulations, in which the tropical upper troposphere warms more than the surface; in G1, because the tropics cool and the  
 30 tropical temperature profile tends to follow a moist adiabat, the upper troposphere also cools, which has a warming effect on the climate by reducing OLR. Atmospheric specific humidity is reduced in the upper troposphere, which makes the atmosphere



less opaque to LW radiation and largely offsets the radiative effect of the tropospheric cooling. Low cloud fraction exhibits a widespread decrease over the ocean and vegetated land areas in all models, which we attribute to decreases in boundary layer inversion strength over the ocean and reduced evaporation from plants due to the physiological response to increased CO<sub>2</sub> over land. The low cloud fraction reduction has a strong surface warming effect due to reduced reflection of sunlight by the clouds. High cloud fraction increases in the global mean in most models, but the LW radiative effect of cloud changes in G1 is slightly negative in the global, multi-model mean. When all the global mean radiative adjustments in G1 are added together, the results account, to within 10%, for the difference between the solar constant reduction that would match the instantaneous CO<sub>2</sub> forcing and the tuned solar constant reduction that met the TOA energy balance threshold required by the G1 experiment protocol.

For future model runs of the G1 experiment, such as those being prepared for the next phase of GeoMIP corresponding to CMIP Phase 6 (Kravitz et al., 2015b), it would be useful to have a better initial guess for the solar constant reduction in order to reduce the necessary amount of tuning. Using Equation 3 for this purpose would be tricky because the radiative responses to the combined CO<sub>2</sub> and solar forcings would be unknown before actually running the model. However, one could simply substitute an empirical value of about  $4 \text{ W m}^{-2}$ , a typical value for the sum of the radiative adjustments in G1 (Figure 10), for  $\sum \Delta R_X$  in Equation 3. Then, tuning would only need to account for model-specific deviations from this number. If instantaneous CO<sub>2</sub> forcing was not available for a particular model, the modelers could add a correction of about  $2.5$  to  $3 \text{ W m}^{-2}$ , a typical value for the black bars in Figure 10, to the effective CO<sub>2</sub> forcing in Equation 1.

Our analysis of the G1 experiment provides some insights into how the climate responds differently to CO<sub>2</sub> and solar forcings, but more work is necessary to better understand this question. The sums of the radiative adjustments in G1 (gray bars of Figure 11) are about  $2 \text{ W m}^{-2}$  larger than the difference between effective and instantaneous forcing in abrupt4xCO<sub>2</sub> (e.g. Table 1 of Zhang and Huang, 2014). This must be due to some combination of the solar forcing enhancing or imperfectly canceling CO<sub>2</sub>-induced radiative adjustments that warm the planet (such as the stratospheric cooling), and the solar forcing overcompensating for adjustments that cool the planet (such as the tropospheric lapse rate adjustment). Going beyond showing the stratospheric adjustment from abrupt4xCO<sub>2</sub> in Figure 11 to separate the contributions of the CO<sub>2</sub> and solar forcings to the radiative adjustments in G1 would be nontrivial. Regressing the APRP- and kernel-derived radiative responses in the abrupt4xCO<sub>2</sub> experiment against global mean temperature change to obtain the rapid adjustments to the CO<sub>2</sub> quadrupling would run into issues with accuracy due to nonlinearity of feedbacks with temperature increases that would skew the location of the intercept (Armour et al., 2013), so an analysis of GCM runs with increased CO<sub>2</sub> and fixed SSTs would be necessary. Furthermore, it may not be the case that the rapid adjustments to the two forcings add together linearly. While some variables, such as global mean temperature, respond linearly to different combinations of CO<sub>2</sub> and solar forcings (Kravitz et al., 2015a), other aspects of the climate system are inherently nonlinear. LW emission goes with the fourth power of temperature, and specific humidity rises exponentially with temperature, a relationship that affects atmospheric energy transport and the meridional temperature gradient (Hwang et al., 2011; Russotto and Ackerman, 2018). The interactions between the exponential dependence of specific humidity and the 4th power dependence of LW emission on temperature may affect the extent to which the water vapor and tropospheric temperature adjustments compensate for each other, as they seem to roughly cancel in G1 but

the water vapor feedback exceeds the lapse rate feedback in global warming simulations (Soden and Held, 2006; Soden et al., 2008; Vial et al., 2013). The water vapor and lapse rate adjustments are dependent on the pattern of tropical cooling and polar warming which might not occur if a latitudinal distribution of solar reflection was targeted to cool the poles more (Ban-Weiss and Caldeira, 2010; Kravitz et al., 2016).

5 It would be very interesting to study how cloud rapid adjustments and feedbacks differ under solar versus CO<sub>2</sub> forcing in a model intercomparison framework. The cloud fraction changes in G1 imply that rapid cloud responses to CO<sub>2</sub> and solar forcings are different, but this requires further study with GCM runs that perturb only the solar constant and not CO<sub>2</sub>. Since the global mean temperature does not change, the G1 experiment tells us very little about cloud feedbacks, which are temperature dependent. An attempt was made (Huneus et al., 2014) to study cloud rapid adjustments and feedbacks under solar forcings  
10 by subtracting the G1 experiment from the abrupt4xCO<sub>2</sub> experiment, but this approach is bound to produce similar feedback parameters for this “solar” forcing versus the abrupt4xCO<sub>2</sub> - piControl CO<sub>2</sub> forcing because, while there are two different baselines, there is only one perturbation run, abrupt4xCO<sub>2</sub>, that has a global mean temperature change onto which radiative flux changes can be regressed. Some studies have included solar-only GCM runs (e.g. Bala et al., 2008; Schaller et al., 2013, 2014; Modak et al., 2016), but these have included only one or two models, and while some, such as Modak et al. (2016),  
15 have looked at cloud radiative effects and cloud fraction, none have used methods that account for cloud masking to isolate the radiative effects of physical cloud changes. There is no solar equivalent of abrupt4xCO<sub>2</sub> in CMIP5 or any of its associated projects; the closest analogue is probably the aerosol-forcing-only historical runs from the CMIP5 “historicalMisc” collection, analyzed, e.g., by Salzmann (2016). The Precipitation Driver and Response Model Intercomparison Project (Myhre et al., 2017) includes a solar constant increase experiment, and the CFMIP component of CMIP6 will include abrupt solar constant  
20 increase and decrease runs (Webb et al., 2017). These ensembles will provide good opportunities to further explore cloud and other changes under solar forcings.

If we were thinking about actually doing solar geoengineering, using Equation 3 to predict the necessary solar reflection would be hampered by the fact that we would not know the radiative responses to the intervention *a priori*. Estimates of these adjustments from models would be subject to uncertainty (note the inter-model spread of 2 W m<sup>-2</sup> in the gray bars of Figure  
25 10), and various aspects of the current anthropogenic radiative forcing, particularly aerosol forcing, also have large uncertainty (Myhre et al., 2013). A smaller-scale geoengineering test that would impose a measurable change in the global mean radiation balance, which might require about one tenth the radiative forcing of a full deployment and last about a decade (MacMynowski et al., 2011; Keith et al., 2014), could provide a better estimate of these quantities. Such a test would pose ethical questions related to justice, compensation and informed consent similar to those for a full deployment (Lenferna et al., 2017). Another  
30 option would be to actively control the global mean temperature by adjusting the amount of solar reflection every year in response to observations (Kravitz et al., 2014). If solar geoengineering was attempting to actually cool the planet from its temperature at the start of deployment (e.g. back to preindustrial conditions or reversing an overshoot of some temperature target), instead of simply preventing future warming under increasing CO<sub>2</sub>, then temperature-dependent feedbacks on the solar forcing, which are not captured by the G1 experiment, may affect the amount of solar geoengineering required. While the lack  
35 of correlation with ECS in Figure 1b suggests that the feedbacks would work just as well for cooling as warming, the inertia

in the system caused by ocean heat storage would affect the rate at which feedbacks could operate, and we should be cautious about extending arguments based on an assumption of equilibrium to such transient situations. Analysis of other GeoMIP experiments, such as G4, that do impose a global mean temperature change from the solar forcing, could help illustrate these issues. If solar geoengineering was to be done using stratospheric aerosols, then an additional layer of uncertainty regarding microphysical and chemical effects would impact the amount of aerosol injection required to achieve the desired forcing, as summarized by Vioni et al. (2017).

Besides their effects on the required solar forcing, the changes in atmospheric physical properties that occur in G1 are interesting in their own right, and may have policy implications if they translated to a real geoengineering deployment. If low cloud fraction were actually reduced by solar geoengineering, it could result in increased solar energy production, and could enhance vegetation growth in sunlight-limited regimes like the Amazon (Nemani et al., 2003). On the other hand, a reduction in low clouds over the ocean would make it more difficult to do marine cloud brightening at the same time as other forms of solar geoengineering. Changes in cirrus clouds are also relevant in the context of research on the effects of sedimentation of injected stratospheric aerosols on high clouds (Kuebbeler et al., 2012; Vioni et al., 2018) and proposals to intentionally thin cirrus clouds with nucleation-inducing aerosols in order to cool the earth by increased LW emission (Mitchell and Finnegan, 2009). The increase in high clouds in most models in G1 indicates that thermodynamic and radiative adjustments to the forcing scenario can have effects on high clouds that may counteract unintentional or intentional microphysical effects. Our analysis of G1 also illustrates that stratospheric ozone could be affected by changes in stratospheric water vapor resulting from TTL temperature changes. In model runs with actual injection of sulfate aerosols, LW absorption of these particles warms the tropical tropopause and increases stratospheric water vapor, which results in decreased ozone concentrations (Heckendorn et al., 2009). Keith et al. (2016) suggest that this risk could be mitigated by instead injecting calcite aerosols, which would absorb much less LW radiation than sulfates, but the inconsistency between models in stratospheric water vapor responses to the G1 experiment, which includes no aerosol injection in G1, shows that much uncertainty remains in this area. Taken together, these issues emphasize the importance of continuing to perform and analyze geoengineering simulations, both in highly idealized scenarios like G1 and more realistic ones like G4 or G4SSA (Tilmes et al., 2015), in order to better understand the climate responses to geoengineering schemes and the different roles played by thermodynamics, radiation, microphysics and chemistry in these responses.

*Author contributions.* R.D. Russotto analyzed the GCM output, produced the figures, and wrote the bulk of the paper. T.P. Ackerman provided general guidance and assisted with the preparation of the manuscript.

*Code availability.* All scripts used to analyze data and create plots are available here:

[https://atmos.washington.edu/~russotto/G1\\_clouds\\_s0\\_paper\\_scripts/index.html](https://atmos.washington.edu/~russotto/G1_clouds_s0_paper_scripts/index.html)

They will be posted to a permanent repository upon acceptance of the paper.

*Acknowledgements.* Three anonymous reviewers provided constructive comments that helped to improve the paper. This work was supported by a grant to JISAO from the Fund for Innovative Climate and Energy Research. For their roles in producing, coordinating, and making

available the CMIP5 and GeoMIP model output, we acknowledge the climate modeling groups (listed in Table 1 of this paper), the World Climate Research Programme's (WCRP) Working Group on Coupled Modelling (WGCM), and the Global Organization for Earth System Science Portals (GO-ESSP). We are grateful to Duoying Ji, Ben Kravitz, Helene Muri, Ulrike Niemeier, Stephen Phipps, and Jin-Ho Yoon for helping to provide access to GeoMIP output that was not available through online repositories; to Karen Shell for helping to explain how  
5 to use the Shell et al. (2008) radiative kernels; and to Eui-Seok Chung for providing numbers for the double-call instantaneous forcing plotted in Chung and Soden (2015). We thank Dargan Frierson, Blaž Gasparini, Cristian Proistosescu, Brian Rose, and Robert Wood for discussions and comments that helped to influence the paper.

## References

- Armour, K. C., Bitz, C. M., and Roe, G. H.: Time-Varying Climate Sensitivity from Regional Feedbacks, *Journal of Climate*, 26, 4518–4534, doi:10.1175/JCLI-D-12-00544.1, 2013.
- Arora, V. K., Scinocca, J. F., Boer, G. J., Christian, J. R., Denman, K. L., Flato, G. M., Kharin, V. V., Lee, W. G., and Merryfield, W. J.: Carbon  
5 emission limits required to satisfy future representative concentration pathways of greenhouse gases, *Geophysical Research Letters*, 38, L05805, doi:10.1029/2010GL046270, 2011.
- Bala, G., Duffy, P., and Taylor, K.: Impact of geoengineering schemes on the global hydrological cycle, *Proceedings of the National Academy of Sciences*, 105, 7664–7669, 2008.
- Ban-Weiss, G. and Caldeira, K.: Geoengineering as an optimization problem, *Environmental Research Letters*, 5, 034009, doi:10.1088/1748-  
10 9326/5/3/034009, 2010.
- Bentsen, M., Bethke, I., Debernard, J. B., Iversen, T., Kirkevåg, A., Seland, Ø., Drange, H., Roelandt, C., Seierstad, I. A., Hoose, C., and Kristjánsson, J. E.: The Norwegian Earth System Model, NorESM1-M – Part 1: Description and basic evaluation of the physical climate, *Geoscientific Model Development*, 6, 687–720, doi:10.5194/gmd-6-687-2013, 2013.
- Block, K. and Mauritsen, T.: Forcing and feedback in the MPI-ESM-LR coupled model under abruptly quadrupled CO<sub>2</sub>, *Journal of Advances  
15 in Modeling Earth Systems*, 5, 676–691, doi:10.1002/jame.20041, 2013.
- Bodas-Salcedo, A., Webb, M. J., Bony, S., Chepfer, H., Dufresne, J.-L., Klein, S. A., Zhang, Y., Marchand, R., Haynes, J. M., Pincus, R., and John, V. O.: COSP: Satellite simulation software for model assessment, *Bulletin of the American Meteorological Society*, 92, 1023–1043, doi:10.1175/2011BAMS2856.1, 2011.
- Bony, S., Webb, M., Bretherton, C., Klein, S., Siebesma, P., Tselioudis, G., and Zhang, M.: CFMIP: Towards a better evaluation and under-  
20 standing of clouds and cloud feedbacks in CMIP5 models, *CLIVAR Exchanges*, 56, 20–24, 2011.
- Bretherton, C. S.: Insights into low-latitude cloud feedbacks from high-resolution models, *Philosophical Transactions of the Royal Society of London A: Mathematical, Physical and Engineering Sciences*, 373, doi:10.1098/rsta.2014.0415, 2015.
- Brewer, A.: Evidence for a world circulation provided by the measurement of helium and water vapour distribution in the stratosphere, *Quarterly Journal of the Royal Meteorological Society*, 75, 351–363, 1949.
- Cao, L., Bala, G., Caldeira, K., Nemani, R., and Ban-Weiss, G.: Importance of carbon dioxide physiological forcing to future climate change, *Proceedings of the National Academy of Sciences*, 107, 9513–9518, 2010.
- Chung, E.-S. and Soden, B. J.: An assessment of methods for computing radiative forcing in climate models, *Environmental Research Letters*,  
10, 074004, doi:10.1088/1748-9326/10/7/074004, 2015.
- Collins, W. J., Bellouin, N., Doutriaux-Boucher, M., Gedney, N., Halloran, P., Hinton, T., Hughes, J., Jones, C. D., Joshi, M., Liddicoat, S.,  
30 Martin, G., O'Connor, F., Rae, J., Senior, C., Sitch, S., Totterdell, I., Wiltshire, A., and Woodward, S.: Development and evaluation of an Earth-System model – HadGEM2, *Geoscientific Model Development*, 4, 1051–1075, doi:10.5194/gmd-4-1051-2011, 2011.
- Crutzen, P. J.: Albedo Enhancement by Stratospheric Sulfur Injections: A Contribution to Resolve a Policy Dilemma?, *Climatic Change*, 77, 211–220, doi:10.1007/s10584-006-9101-y, 2006.
- Dufresne, J.-L., Foujols, M.-A., Denvil, S., Caubel, A., Marti, O., Aumont, O., Balkanski, Y., Bekki, S., Bellenger, H., Benshila, R., Bony,  
35 S., Bopp, L., Braconnot, P., Brockmann, P., Cadule, P., Cheruy, F., Codron, F., Cozic, A., Cugnet, D., de Noblet, N., Duvel, J.-P., Ethé, C., Fairhead, L., Fichefet, T., Flavoni, S., Friedlingstein, P., Grandpeix, J.-Y., Guez, L., Guilyardi, E., Hauglustaine, D., Hourdin, F., Idelkadi, A., Ghattas, J., Joussaume, S., Kageyama, M., Krinner, G., Labetoulle, S., Lahellec, A., Lefebvre, M.-P., Lefevre, F., Levy, C., Li, Z. X.,

- Lloyd, J., Lott, F., Madec, G., Mancip, M., Marchand, M., Masson, S., Meurdesoif, Y., Mignot, J., Musat, I. d.-., Parouty, S., Polcher, J., Rio, C., Schulz, M., Swingedouw, D., Szopa, S., Talandier, C., Terray, P., Viovy, N., and Vuichard, N.: Climate change projections using the IPSL-CM5 Earth System Model: from CMIP3 to CMIP5, *Climate Dynamics*, 40, 2123–2165, doi:10.1007/s00382-012-1636-1, 2013.
- Feulner, G.: The Faint Young Sun Problem, *Reviews of Geophysics*, 50, RG2006, doi:10.1029/2011RG000375, 2012.
- 5 Field, C. B., Jackson, R. B., and Mooney, H. A.: Stomatal responses to increased CO<sub>2</sub>: implications from the plant to the global scale, *Plant, Cell & Environment*, 18, 1214–1225, doi:10.1111/j.1365-3040.1995.tb00630.x, 1995.
- Fueglistaler, S., Dessler, A. E., Dunkerton, T. J., Folkins, I., Fu, Q., and Mote, P. W.: Tropical tropopause layer, *Reviews of Geophysics*, 47, RG1004, 2009.
- Gent, P. R., Danabasoglu, G., Donner, L. J., Holland, M. M., Hunke, E. C., Jayne, S. R., Lawrence, D. M., Neale, R. B., Rasch, P. J., Vertenstein, M., Worley, P. H., Yang, Z.-L., and Zhang, M.: The Community Climate System Model Version 4, *Journal of Climate*, 24, 4973–4991, doi:10.1175/2011JCLI4083.1, 2011.
- 10 Giorgetta, M. A., Jungclaus, J., Reick, C. H., Legutke, S., Bader, J., Böttinger, M., Brovkin, V., Crueger, T., Esch, M., Fieg, K., Glushak, K., Gayler, V., Haak, H., Hollweg, H.-D., Ilyina, T., Kinne, S., Kornblueh, L., Matei, D., Mauritsen, T., Mikolajewicz, U., Mueller, W., Notz, D., Pithan, F., Raddatz, T., Rast, S., Redler, R., Roeckner, E., Schmidt, H., Schnur, R., Segschneider, J., Six, K. D., Stockhause, M., Timmreck, C., Wegner, J., Widmann, H., Wieners, K.-H., Claussen, M., Marotzke, J., and Stevens, B.: Climate and carbon cycle changes from 1850 to 2100 in MPI-ESM simulations for the Coupled Model Intercomparison Project phase 5, *Journal of Advances in Modeling Earth Systems*, 5, 572–597, doi:10.1002/jame.20038, 2013.
- 15 Govindasamy, B., Caldeira, K., and Duffy, P.: Geoengineering Earth’s radiation balance to mitigate climate change from a quadrupling of CO<sub>2</sub>, *Global and Planetary Change*, 37, 157 – 168, doi:http://dx.doi.org/10.1016/S0921-8181(02)00195-9, 2003.
- 20 Gregory, J. and Webb, M.: Tropospheric Adjustment Induces a Cloud Component in CO<sub>2</sub> Forcing, *Journal of Climate*, 21, 58–71, doi:10.1175/2007JCLI1834.1, 2008.
- Gregory, J. M., Ingram, W. J., Palmer, M. A., Jones, G. S., Stott, P. A., Thorpe, R. B., Lowe, J. A., Johns, T. C., and Williams, K. D.: A new method for diagnosing radiative forcing and climate sensitivity, *Geophysical Research Letters*, 31, n/a–n/a, doi:10.1029/2003GL018747, 103205, 2004.
- 25 Guo, A., Moore, J. C., and Ji, D.: Tropical atmospheric circulation response to the G1 sunshade geoengineering radiative forcing experiment, *Atmospheric Chemistry and Physics Discussions*, 2018, 1–53, doi:10.5194/acp-2018-141, 2018.
- Hansen, J., Sato, M., Ruedy, R., Nazarenko, L., Lacis, A., Schmidt, G. A., Russell, G., Aleinov, I., Bauer, M., Bauer, S., Bell, N., Cairns, B., Canuto, V., Chandler, M., Cheng, Y., Del Genio, A., Faluvegi, G., Fleming, E., Friend, A., Hall, T., Jackman, C., Kelley, M., Kiang, N., Koch, D., Lean, J., Lerner, J., Lo, K., Menon, S., Miller, R., Minnis, P., Novakov, T., Oinas, V., Perlwitz, J., Perlwitz, J., Rind, D., Romanou, A., Shindell, D., Stone, P., Sun, S., Tausnev, N., Thresher, D., Wielicki, B., Wong, T., Yao, M., and Zhang, S.: Efficacy of climate forcings, *Journal of Geophysical Research: Atmospheres*, 110, D18104, doi:10.1029/2005JD005776, 2005.
- 30 Heckendorn, P., Weisenstein, D., Fueglistaler, S., Luo, B. P., Rozanov, E., Schraner, M., Thomason, L. W., and Peter, T.: The impact of geoengineering aerosols on stratospheric temperature and ozone, *Environmental Research Letters*, 4, 045 108, doi:10.1088/1748-9326/4/4/045108, 2009.
- 35 Held, I. M. and Soden, B. J.: Robust Responses of the Hydrological Cycle to Global Warming, *Journal of Climate*, 19, 5686–5699, doi:http://dx.doi.org/10.1175/JCLI3990.1, 2006.

- Hong, Y., Moore, J. C., Jevrejeva, S., Ji, D., Phipps, S. J., Lenton, A., Tilmes, S., Watanabe, S., and Zhao, L.: Impact of the GeoMIP G1 sunshade geoengineering experiment on the Atlantic meridional overturning circulation, *Environmental Research Letters*, 12, 034009, doi:10.1088/1748-9326/aa5fb8, 2017.
- Huneus, N., Boucher, O., Alterskjær, K., Cole, J. N. S., Curry, C. L., Ji, D., Jones, A., Kravitz, B., Kristjánsson, J. E., Moore, J. C., Muri, H., Niemeier, U., Rasch, P., Robock, A., Singh, B., Schmidt, H., Schulz, M., Tilmes, S., Watanabe, S., and Yoon, J.-H.: Forcings and feedbacks in the GeoMIP ensemble for a reduction in solar irradiance and increase in CO<sub>2</sub>, *Journal of Geophysical Research: Atmospheres*, 119, 5226–5239, doi:10.1002/2013JD021110, <http://dx.doi.org/10.1002/2013JD021110>, 2013JD021110, 2014.
- Hurrell, J. W., Holland, M. M., Gent, P. R., Ghan, S., Kay, J. E., Kushner, P. J., Lamarque, J.-F., Large, W. G., Lawrence, D., Lindsay, K., Lipscomb, W. H., Long, M. C., Mahowald, N., Marsh, D. R., Neale, R. B., Rasch, P., Vavrus, S., Vertenstein, M., Bader, D., Collins, W. D., Hack, J. J., Kiehl, J., and Marshall, S.: The Community Earth System Model: A Framework for Collaborative Research, *Bulletin of the American Meteorological Society*, 94, 1339–1360, doi:10.1175/BAMS-D-12-00121.1, 2013.
- Hwang, Y.-T., Frierson, D. M. W., and Kay, J. E.: Coupling between Arctic feedbacks and changes in poleward energy transport, *Geophysical Research Letters*, 38, L17704, doi:10.1029/2011GL048546, 2011.
- IPCC: Climate Change 2013: The Physical Science Basis. Contribution of Working Group I to the Fifth Assessment Report of the Intergovernmental Panel on Climate Change, Cambridge University Press, Cambridge, United Kingdom and New York, NY, USA, doi:10.1017/CBO9781107415324, [www.climatechange2013.org](http://www.climatechange2013.org), 2013.
- Ji, D., Wang, L., Feng, J., Wu, Q., Cheng, H., Zhang, Q., Yang, J., Dong, W., Dai, Y., Gong, D., Zhang, R.-H., Wang, X., Liu, J., Moore, J. C., Chen, D., and Zhou, M.: Description and basic evaluation of Beijing Normal University Earth System Model (BNU-ESM) version 1, *Geoscientific Model Development*, 7, 2039–2064, doi:10.5194/gmd-7-2039-2014, <http://www.geosci-model-dev.net/7/2039/2014/>, 2014.
- Keith, D. W., Duren, R., and MacMartin, D. G.: Field experiments on solar geoengineering: report of a workshop exploring a representative research portfolio, *Philosophical Transactions of the Royal Society A*, 372, 20140 175, doi:10.1098/rsta.2014.0175, 2014.
- Keith, D. W., Weisenstein, D. K., Dykema, J. A., and Keutsch, F. N.: Stratospheric solar geoengineering without ozone loss, *Proceedings of the National Academy of Sciences*, 113, 14 910–14 914, doi:10.1073/pnas.1615572113, 2016.
- Klein, S. A. and Hartmann, D. L.: The seasonal cycle of low stratiform clouds, *Journal of Climate*, 6, 1587–1606, 1993.
- Klein, S. A. and Jakob, C.: Validation and Sensitivities of Frontal Clouds Simulated by the ECMWF Model, *Monthly Weather Review*, 127, 2514–2531, doi:10.1175/1520-0493(1999)127<2514:VASOFC>2.0.CO;2, 1999.
- Kravitz, B., Robock, A., Boucher, O., Schmidt, H., and Taylor, K. E.: Specifications for GeoMIP experiments G1 through G4, URL: [http://climate.envsci.rutgers.edu/GeoMIP/docs/specificationsG1\\_G4\\_v1.0.pdf](http://climate.envsci.rutgers.edu/GeoMIP/docs/specificationsG1_G4_v1.0.pdf) [Accessed March 2015], Version 1.0, 2011a.
- Kravitz, B., Robock, A., Boucher, O., Schmidt, H., Taylor, K. E., Stenchikov, G., and Schulz, M.: The Geoengineering Model Intercomparison Project (GeoMIP), *Atmospheric Science Letters*, 12, 162–167, doi:10.1002/asl.316, 2011b.
- Kravitz, B., Caldeira, K., Boucher, O., Robock, A., Rasch, P. J., Alterskjær, K., Karam, D. B., Cole, J. N. S., Curry, C. L., Haywood, J. M., Irvine, P. J., Ji, D., Jones, A., Kristjánsson, J. E., Lunt, D. J., Moore, J. C., Niemeier, U., Schmidt, H., Schulz, M., Singh, B., Tilmes, S., Watanabe, S., Yang, S., and Yoon, J.-H.: Climate model response from the Geoengineering Model Intercomparison Project (GeoMIP), *Journal of Geophysical Research: Atmospheres*, 118, 8320–8332, doi:10.1002/jgrd.50646, 2013a.
- Kravitz, B., Rasch, P. J., Forster, P. M., Andrews, T., Cole, J. N. S., Irvine, P. J., Ji, D., Kristjánsson, J. E., Moore, J. C., Muri, H., Niemeier, U., Robock, A., Singh, B., Tilmes, S., Watanabe, S., and Yoon, J.-H.: An energetic perspective on hydrological cycle changes in the Geoengineering Model Intercomparison Project, *Journal of Geophysical Research: Atmospheres*, 118, 13,087–13,102, doi:10.1002/2013JD020502, 2013b.



- Kravitz, B., MacMartin, D. G., Leedal, D. T., Rasch, P. J., and Jarvis, A. J.: Explicit feedback and the management of uncertainty in meeting climate objectives with solar geoengineering, *Environmental Research Letters*, 9, 044 006, doi:10.1088/1748-9326/9/4/044006, 2014.
- Kravitz, B., MacMartin, D. G., Rasch, P. J., and Jarvis, A. J.: A New Method of Comparing Forcing Agents in Climate Models, *Journal of Climate*, 28, 8203–8218, doi:10.1175/JCLI-D-14-00663.1, 2015a.
- 5 Kravitz, B., Robock, A., Tilmes, S., Boucher, O., English, J. M., Irvine, P. J., Jones, A., Lawrence, M. G., MacCracken, M., Muri, H., Moore, J. C., Niemeier, U., Phipps, S. J., Sillmann, J., Storelvmo, T., Wang, H., and Watanabe, S.: The Geoengineering Model Inter-comparison Project Phase 6 (GeoMIP6): simulation design and preliminary results, *Geoscientific Model Development*, 8, 3379–3392, doi:10.5194/gmd-8-3379-2015, 2015b.
- Kravitz, B., MacMartin, D., Wang, H., and Rasch, P.: Geoengineering as a design problem, *Earth System Dynamics*, 7, 469–497, doi:10.5194/esd-7-469-2016, 2016.
- 10 Kuebbeler, M., Lohmann, U., and Feichter, J.: Effects of stratospheric sulfate aerosol geo-engineering on cirrus clouds, *Geophysical Research Letters*, 39, L23803, doi:10.1029/2012GL053797, 2012.
- Lenferna, G. A., Russotto, R. D., Tan, A., Gardiner, S. M., and Ackerman, T. P.: Relevant climate response tests for stratospheric aerosol injection: A combined ethical and scientific analysis, *Earth’s Future*, 5, 577–591, doi:10.1002/2016EF000504, 2017.
- 15 MacMynowski, D. G., Keith, D. W., Caldeira, K., and Shin, H.-J.: Can we test geoengineering?, *Energy Environ. Sci.*, 4, 5044–5052, doi:10.1039/c1ee01256h, 2011.
- Manabe, S. and Wetherald, R. T.: The Effects of Doubling the CO<sub>2</sub> Concentration on the Climate of a General Circulation Model, *Journal of the Atmospheric Sciences*, 32, 3–15, doi:10.1175/1520-0469(1975)032<0003:TEODTC>2.0.CO;2, 1975.
- Matthews, H. D. and Caldeira, K.: Transient climate–carbon simulations of planetary geoengineering, *Proceedings of the National Academy of Sciences*, 104, 9949–9954, doi:10.1073/pnas.0700419104, 2007.
- 20 Mitchell, D. L. and Finnegan, W.: Modification of cirrus clouds to reduce global warming, *Environmental Research Letters*, 4, 045102, doi:10.1088/1748-9326/4/4/045102, 2009.
- Modak, A., Bala, G., Cao, L., and Caldeira, K.: Why must a solar forcing be larger than a CO<sub>2</sub> forcing to cause the same global mean surface temperature change?, *Environmental Research Letters*, 11, 044013, 2016.
- 25 Myhre, G., Shindell, D., Bréon, F.-M., Collins, W., Fuglestad, J., Huang, J., Koch, D., Lamarque, J.-F., Lee, D., Mendoza, B., Nakajima, T., Robock, A., Stephens, G., Takemura, T., and Zhang, H.: Anthropogenic and Natural Radiative Forcing, in: *Climate Change 2013: The Physical Science Basis. Contribution of Working Group I to the Fifth Assessment Report of the Intergovernmental Panel on Climate Change*, edited by Stocker, T., Qin, D., Plattner, G.-K., Tignor, M., Allen, S., Boschung, J., Nauels, A., Xia, Y., Bex, V., and Midgley, P., chap. 8, p. 659–740, Cambridge University Press, Cambridge, United Kingdom and New York, NY, USA, doi:10.1017/CBO9781107415324.018, www.climatechange2013.org, 2013.
- 30 Myhre, G., Forster, P. M., Samset, B. H., Hodnebrog, Ø., Sillmann, J., Aalberg, S. G., Andrews, T., Boucher, O., Faluvegi, G., Fläschner, D., Iversen, T., Kasoar, M., Kharin, V., Kirkevåg, A., Lamarque, J.-F., Olivé, D., Richardson, T. B., Shindell, D., Shine, K. P., Stjern, C. W., Takemura, T., Voulgarakis, A., and Zwiers, F.: PDRMIP: A Precipitation Driver and Response Model Intercomparison Project—Protocol and Preliminary Results, *Bulletin of the American Meteorological Society*, 98, 1185–1198, doi:10.1175/BAMS-D-16-0019.1, 2017.
- 35 Nemani, R. R., Keeling, C. D., Hashimoto, H., Jolly, W. M., Piper, S. C., Tucker, C. J., Myneni, R. B., and Running, S. W.: Climate-Driven Increases in Global Terrestrial Net Primary Production from 1982 to 1999, *Science*, 300, 1560–1563, doi:10.1126/science.1082750, 2003.
- Newell, R. E. and Gould-Stewart, S.: A Stratospheric Fountain?, *Journal of the Atmospheric Sciences*, 38, 2789–2796, 1981.

- NOAA: U.S. Standard Atmosphere: 1976, National Oceanographic and Atmospheric Administration, Washington, DC, NOAA-S/T 76-1562, 1976.
- Pendergrass, A. G., Conley, A., and Vitt, F. M.: Surface and top-of-atmosphere radiative feedback kernels for CESM-CAM5, *Earth System Science Data*, 10, 317–324, doi:10.5194/essd-10-317-2018, 2018.
- 5 Phipps, S. J., Rotstayn, L. D., Gordon, H. B., Roberts, J. L., Hirst, A. C., and Budd, W. F.: The CSIRO Mk3L climate system model version 1.0 – Part 1: Description and evaluation, *Geoscientific Model Development*, 4, 483–509, doi:10.5194/gmd-4-483-2011, 2011.
- Qu, X., Hall, A., Klein, S., and Caldwell, P. M.: On the spread of changes in marine low cloud cover in climate model simulations of the 21st century, *Climate Dynamics*, 42, 2603–2626, 2014.
- Rossow, W. B. and Schiffer, R. A.: Advances in Understanding Clouds from ISCCP, *Bulletin of the American Meteorological Society*, 80, 2261–2287, doi:10.1175/1520-0477(1999)080<2261:AIUCFI>2.0.CO;2, 1999.
- 10 Russotto, R. D. and Ackerman, T. P.: Energy transport, polar amplification, and ITCZ shifts in the GeoMIP G1 ensemble, *Atmospheric Chemistry and Physics*, 18, 2287–2305, doi:10.5194/acp-18-2287-2018, 2018.
- Salzmann, M.: Global warming without global mean precipitation increase?, *Science Advances*, 2, doi:10.1126/sciadv.1501572, 2016.
- Santer, B., Wehner, M., Wigley, T., Sausen, R., Meehl, G., Taylor, K., Ammann, C., Arblaster, J., Washington, W., Boyle, J., and
- 15 Brügemann, W.: Contributions of Anthropogenic and Natural Forcing to Recent Tropopause Height Changes, *Science*, 301, 479–483, doi:10.1126/science.1084123, 2003.
- Schaller, N., Cermak, J., Wild, M., and Knutti, R.: The sensitivity of the modeled energy budget and hydrological cycle to CO<sub>2</sub> and solar forcing, *Earth System Dynamics*, 4, 253–266, doi:10.5194/esd-4-253-2013, 2013.
- Schaller, N., Sedláček, J., and Knutti, R.: The asymmetry of the climate system’s response to solar forcing changes and its implications for
- 20 geoengineering scenarios, *Journal of Geophysical Research: Atmospheres*, 119, 5171–5184, doi:10.1002/2013JD021258, 2014.
- Schmidt, G. A., Kelley, M., Nazarenko, L., Ruedy, R., Russell, G. L., Aleinov, I., Bauer, M., Bauer, S. E., Bhat, M. K., Bleck, R., Canuto, V., Chen, Y.-H., Cheng, Y., Clune, T. L., Del Genio, A., de Fainchtein, R., Faluvegi, G., Hansen, J. E., Healy, R. J., Kiang, N. Y., Koch, D., Lacis, A. A., LeGrande, A. N., Lerner, J., Lo, K. K., Matthews, E. E., Menon, S., Miller, R. L., Oinas, V., Olosio, A. O., Perlwitz, J. P., Puma, M. J., Putman, W. M., Rind, D., Romanou, A., Sato, M., Shindell, D. T., Sun, S., Syed, R. A., Tausnev, N., Tsigaridis, K., Unger,
- 25 N., Voulgarakis, A., Yao, M.-S., and Zhang, J.: Configuration and assessment of the GISS ModelE2 contributions to the CMIP5 archive, *Journal of Advances in Modeling Earth Systems*, 6, 141–184, doi:10.1002/2013MS000265, 2014.
- Schmidt, H., Alterskjær, K., Bou Karam, D., Boucher, O., Jones, A., Kristjánsson, J. E., Niemeier, U., Schulz, M., Aaheim, A., Benduhn, F., Lawrence, M., and Timmreck, C.: Solar irradiance reduction to counteract radiative forcing from a quadrupling of CO<sub>2</sub>: climate responses simulated by four earth system models, *Earth System Dynamics*, 3, 63–78, doi:10.5194/esd-3-63-2012, 2012.
- 30 Shell, K. M., Kiehl, J. T., and Shields, C. A.: Using the Radiative Kernel Technique to Calculate Climate Feedbacks in NCAR’s Community Atmospheric Model, *Journal of Climate*, 21, 2269–2282, doi:10.1175/2007JCLI2044.1, 2008.
- Sherwood, S. C., Bony, S., and Dufresne, J.-L.: Spread in model climate sensitivity traced to atmospheric convective mixing, *Nature*, 505, 37–42, doi:10.1038/nature12829, 2014.
- Slingo, J.: The development and verification of a cloud prediction scheme for the ECMWF model, *Quarterly Journal of the Royal Meteorological Society*, 113, 899–927, 1987.
- 35 Smyth, J. E., Russotto, R. D., and Storelvmo, T.: Thermodynamic and dynamic responses of the hydrological cycle to solar dimming, *Atmospheric Chemistry and Physics*, 17, 6439–6453, doi:10.5194/acp-17-6439-2017, <https://www.atmos-chem-phys.net/17/6439/2017/>, 2017.

- Soden, B. J. and Held, I. M.: An Assessment of Climate Feedbacks in Coupled Ocean-Atmosphere Models, *Journal of Climate*, 19, 3354–3360, doi:10.1175/JCLI3799.1, 2006.
- Soden, B. J., Held, I. M., Colman, R., Shell, K. M., Kiehl, J. T., and Shields, C. A.: Quantifying Climate Feedbacks Using Radiative Kernels, *Journal of Climate*, 21, 3504–3520, 2008.
- 5 Taylor, K. E., Crucifix, M., Braconnot, P., Hewitt, C. D., Doutriaux, C., Broccoli, A. J., Mitchell, J. F. B., and Webb, M. J.: Estimating Shortwave Radiative Forcing and Response in Climate Models, *Journal of Climate*, 20, 2530–2543, doi:10.1175/JCLI4143.1, 2007.
- Taylor, K. E., Stouffer, R. J., and Meehl, G. A.: An overview of CMIP5 and the Experiment Design, *Bulletin of the American Meteorological Society*, 93, 485–198, 2012.
- Tilmes, S., Fasullo, J., Lamarque, J.-F., Marsh, D. R., Mills, M., Alterskjær, K., Muri, H., Kristjánsson, J. E., Boucher, O., Schulz, M., Cole, J.  
10 N. S., Curry, C. L., Jones, A., Haywood, J., Irvine, P. J., Ji, D., Moore, J. C., Karam, D. B., Kravitz, B., Rasch, P. J., Singh, B., Yoon, J.-H., Niemeier, U., Schmidt, H., Robock, A., Yang, S., and Watanabe, S.: The hydrological impact of geoengineering in the Geoengineering Model Intercomparison Project (GeoMIP), *Journal of Geophysical Research: Atmospheres*, 118, 11,036–11,058, doi:10.1002/jgrd.50868, 2013.
- Tilmes, S., Mills, M. J., Niemeier, U., Schmidt, H., Robock, A., Kravitz, B., Lamarque, J.-F., Pitari, G., and English, J. M.: A new Geoengi-  
15 neering Model Intercomparison Project (GeoMIP) experiment designed for climate and chemistry models, *Geoscientific Model Development*, 8, 43–49, doi:10.5194/gmd-8-43-2015, 2015.
- Vial, J., Dufresne, J.-L., and Bony, S.: On the interpretation of inter-model spread in CMIP5 climate sensitivity estimates, *Climate Dynamics*, 41, 3339–3362, doi:10.1007/s00382-013-1725-9, 2013.
- Vimont, D.: Dan Vimont’s Matlab Libraries, <http://www.aos.wisc.edu/~dvimont/matlab/>.
- 20 Visioni, D., Pitari, G., and Auqila, V.: Sulfate geoengineering: a review of the factors controlling the needed injection of sulfur dioxide, *Atmospheric Chemistry and Physics*, 17, 3879–3889, doi:10.5194/acp-17-3879-2017, 2017.
- Visioni, D., Pitari, G., and di Genova, G.: Upper tropospheric ice sensitivity to sulfate geoengineering, *Atmospheric Chemistry and Physics Discussions*, 2018, 1–37, doi:10.5194/acp-2018-107, 2018.
- Watanabe, S., Hajima, T., Sudo, K., Nagashima, T., Takemura, T., Okajima, H., Nozawa, T., Kawase, H., Abe, M., Yokohata, T., Ise, T.,  
25 Sato, H., Kato, E., Takata, K., Emori, S., and Kawamiya, M.: MIROC-ESM 2010: model description and basic results of CMIP5-20C3M experiments, *Geoscientific Model Development*, 4, 845–872, doi:10.5194/gmd-4-845-2011, 2011.
- Webb, M., Senior, C., Bony, S., and Morcrette, J.-J.: Combining ERBE and ISCCP data to assess clouds in the Hadley Centre, ECMWF and LMD atmospheric climate models, *Climate Dynamics*, 17, 905–922, doi:10.1007/s003820100157, 2001.
- Webb, M. J., Andrews, T., Bodas-Salcedo, A., Bony, S., Bretherton, C. S., Chadwick, R., Chepfer, H., Douville, H., Good, P., Kay, J. E.,  
30 Klein, S. A., Marchand, R., Medeiros, B., Siebesma, A. P., Skinner, C. B., Stevens, B., Tselioudis, G., Tsushima, Y., and Watanabe, M.: The Cloud Feedback Model Intercomparison Project (CFMIP) contribution to CMIP6, *Geoscientific Model Development*, 10, 359–384, doi:10.5194/gmd-10-359-2017, 2017.
- Wetherald, R. T. and Manabe, S.: The effects of changing the solar constant on the climate of a general circulation model, *Journal of the Atmospheric Sciences*, 32, 2044–2059, 1975.
- 35 Wood, R. and Bretherton, C. S.: On the Relationship between Stratiform Low Cloud Cover and Lower-Tropospheric Stability, *Journal of Climate*, 19, 6425–6432, 2006.
- World Meteorological Organization: WMO Greenhouse Gas Bulletin, [https://library.wmo.int/opac/doc\\_num.php?explnum\\_id=4022](https://library.wmo.int/opac/doc_num.php?explnum_id=4022), 2017.

Zelinka, M. D., Klein, S. A., and Hartmann, D. L.: Computing and Partitioning Cloud Feedbacks Using Cloud Property Histograms. Part I: Cloud Radiative Kernels, *J. Climate*, 25, 3715–3735, 2012a.

Zelinka, M. D., Klein, S. A., and Hartmann, D. L.: Computing and Partitioning Cloud Feedbacks Using Cloud Property Histograms. Part II: Attribution to Changes in Cloud Amount, Altitude, and Optical Depth, *J. Climate*, 25, 3736–3754, doi:10.1175/JCLI-D-11-00249.1, 2012b.

Zhang, M. and Huang, Y.: Radiative Forcing of Quadrupling CO<sub>2</sub>, *Journal of Climate*, 27, 2496–2508, doi:10.1175/JCLI-D-13-00535.1, 2014.

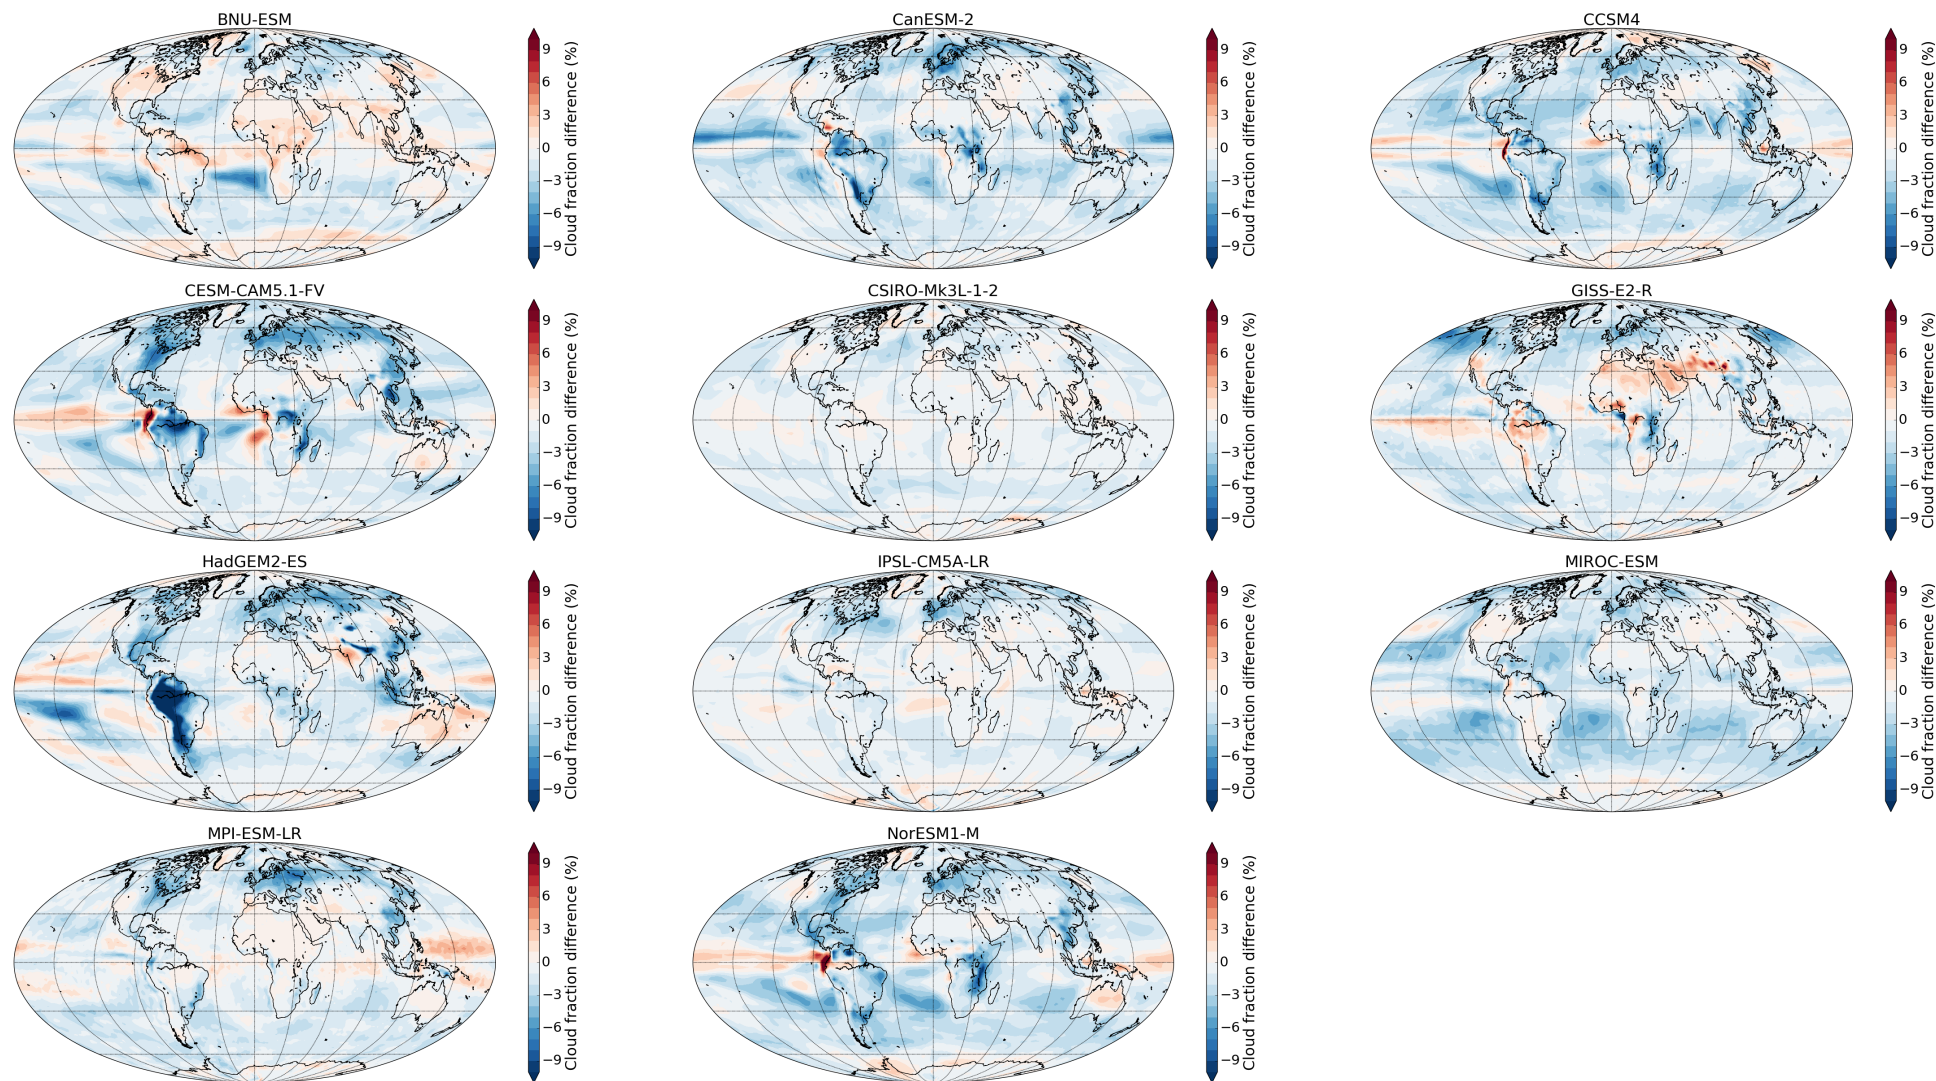

Figure S1: Change in low cloud fraction in G1 minus piControl in each model.

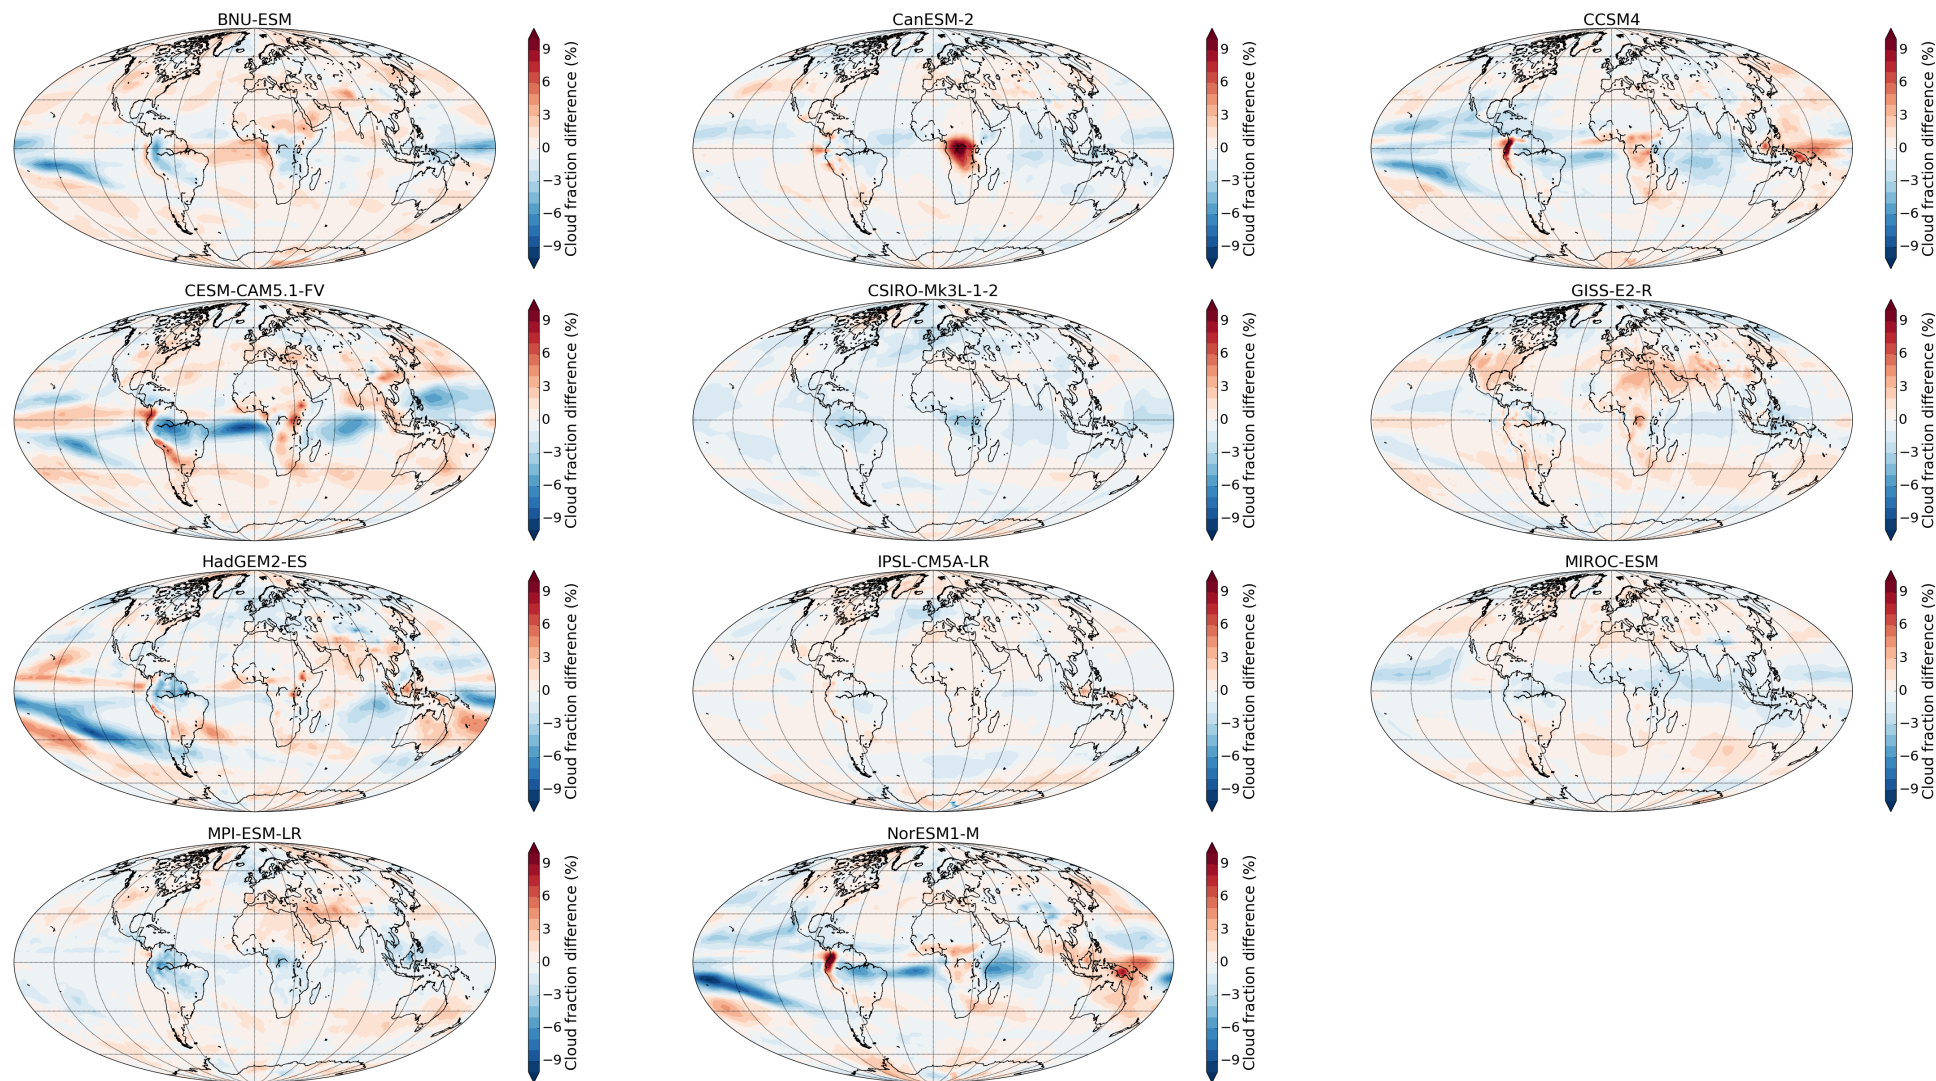

Figure S2: Change in middle cloud fraction in G1 minus piControl in each model.



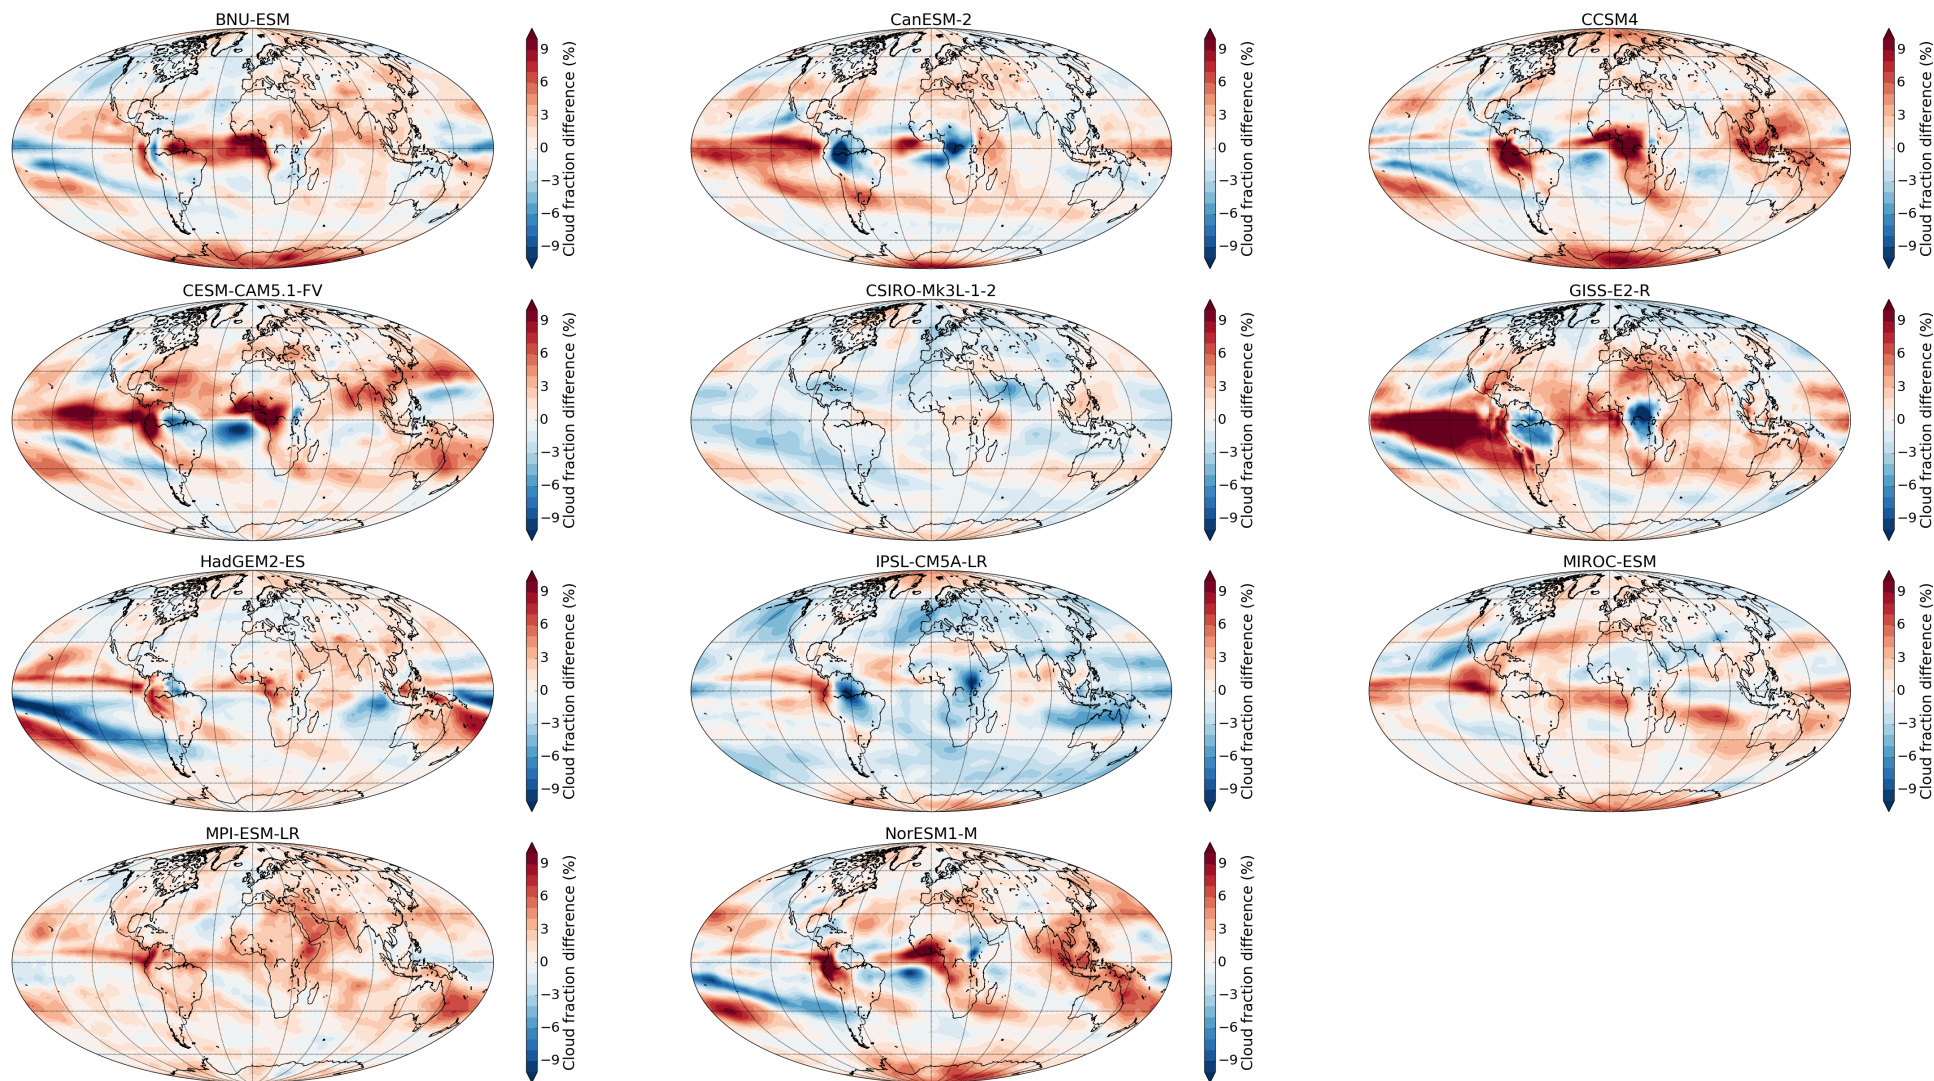

Figure S3: Change in high cloud fraction in G1 minus piControl in each model.



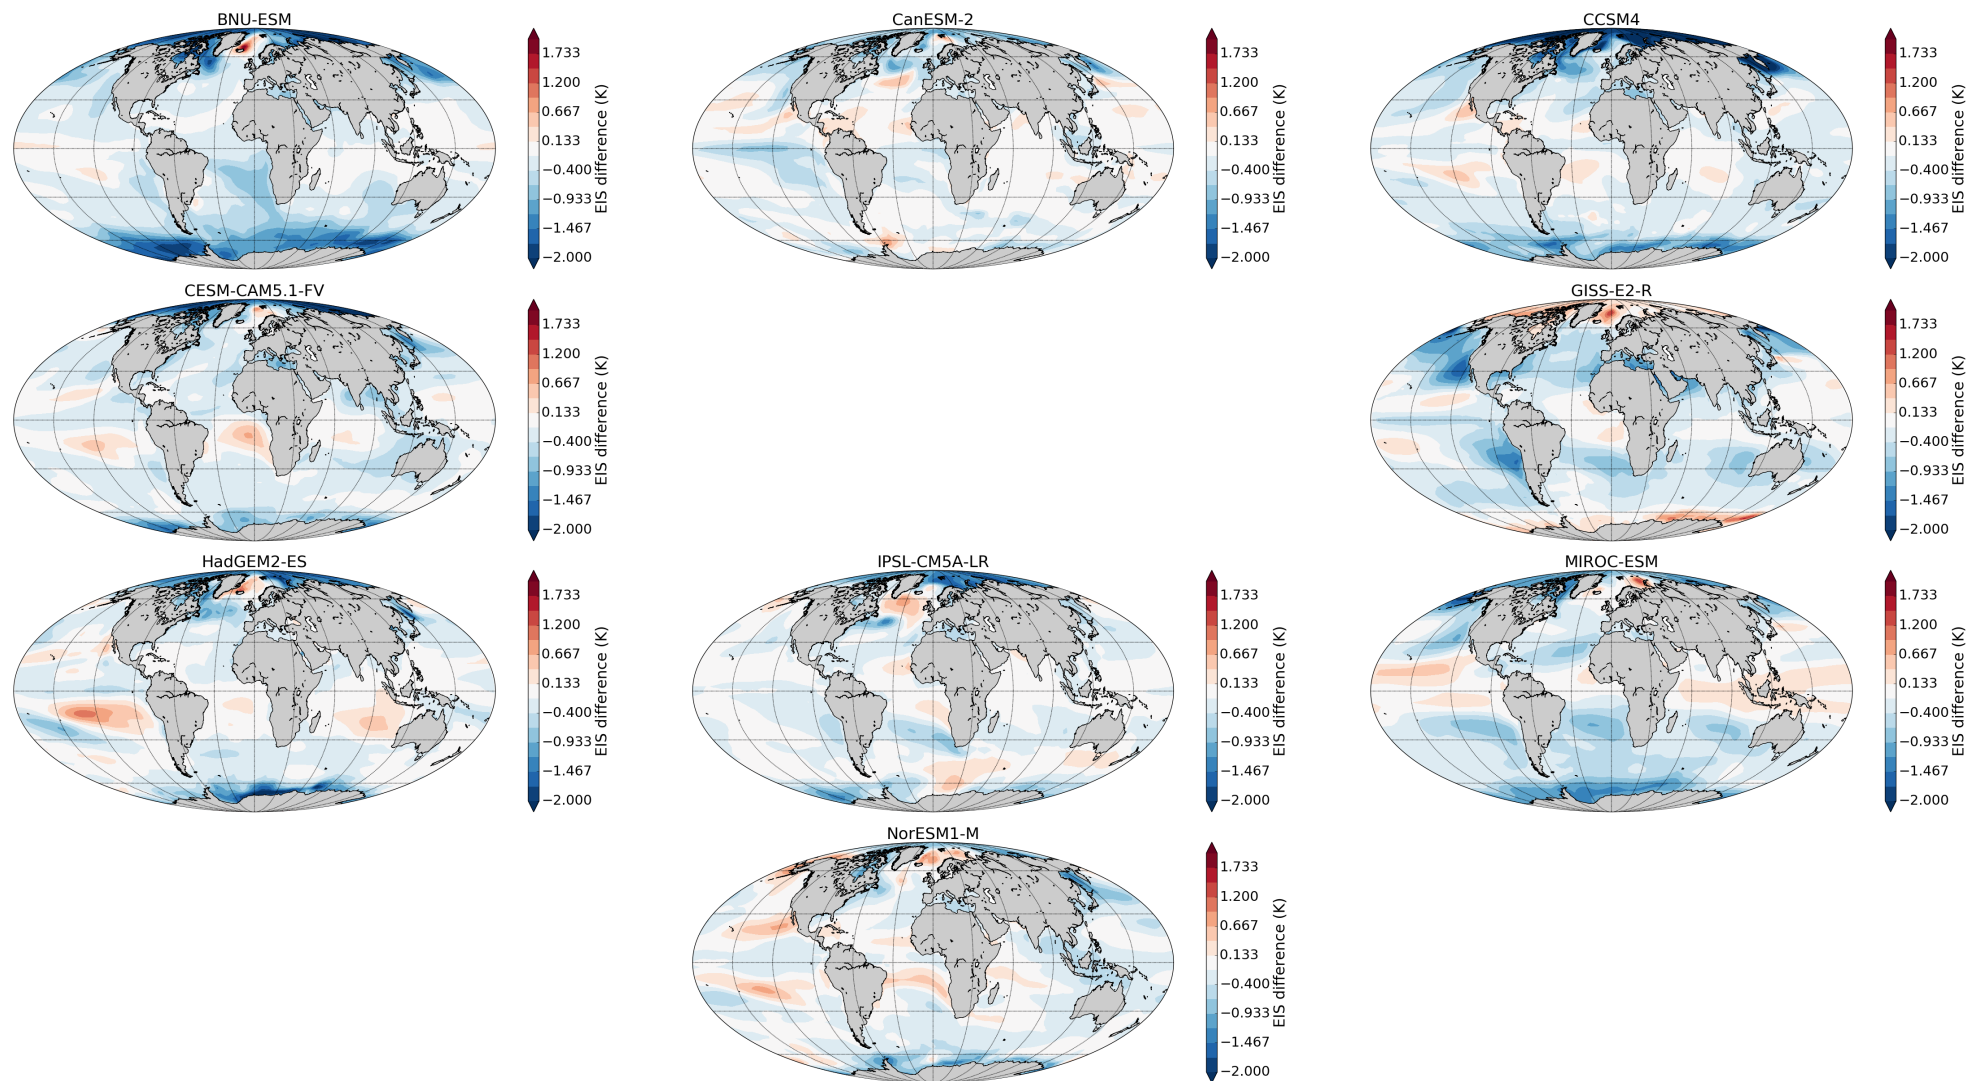

Figure S4: Change in Estimated Inversion Strength in G1 minus piControl in each model.

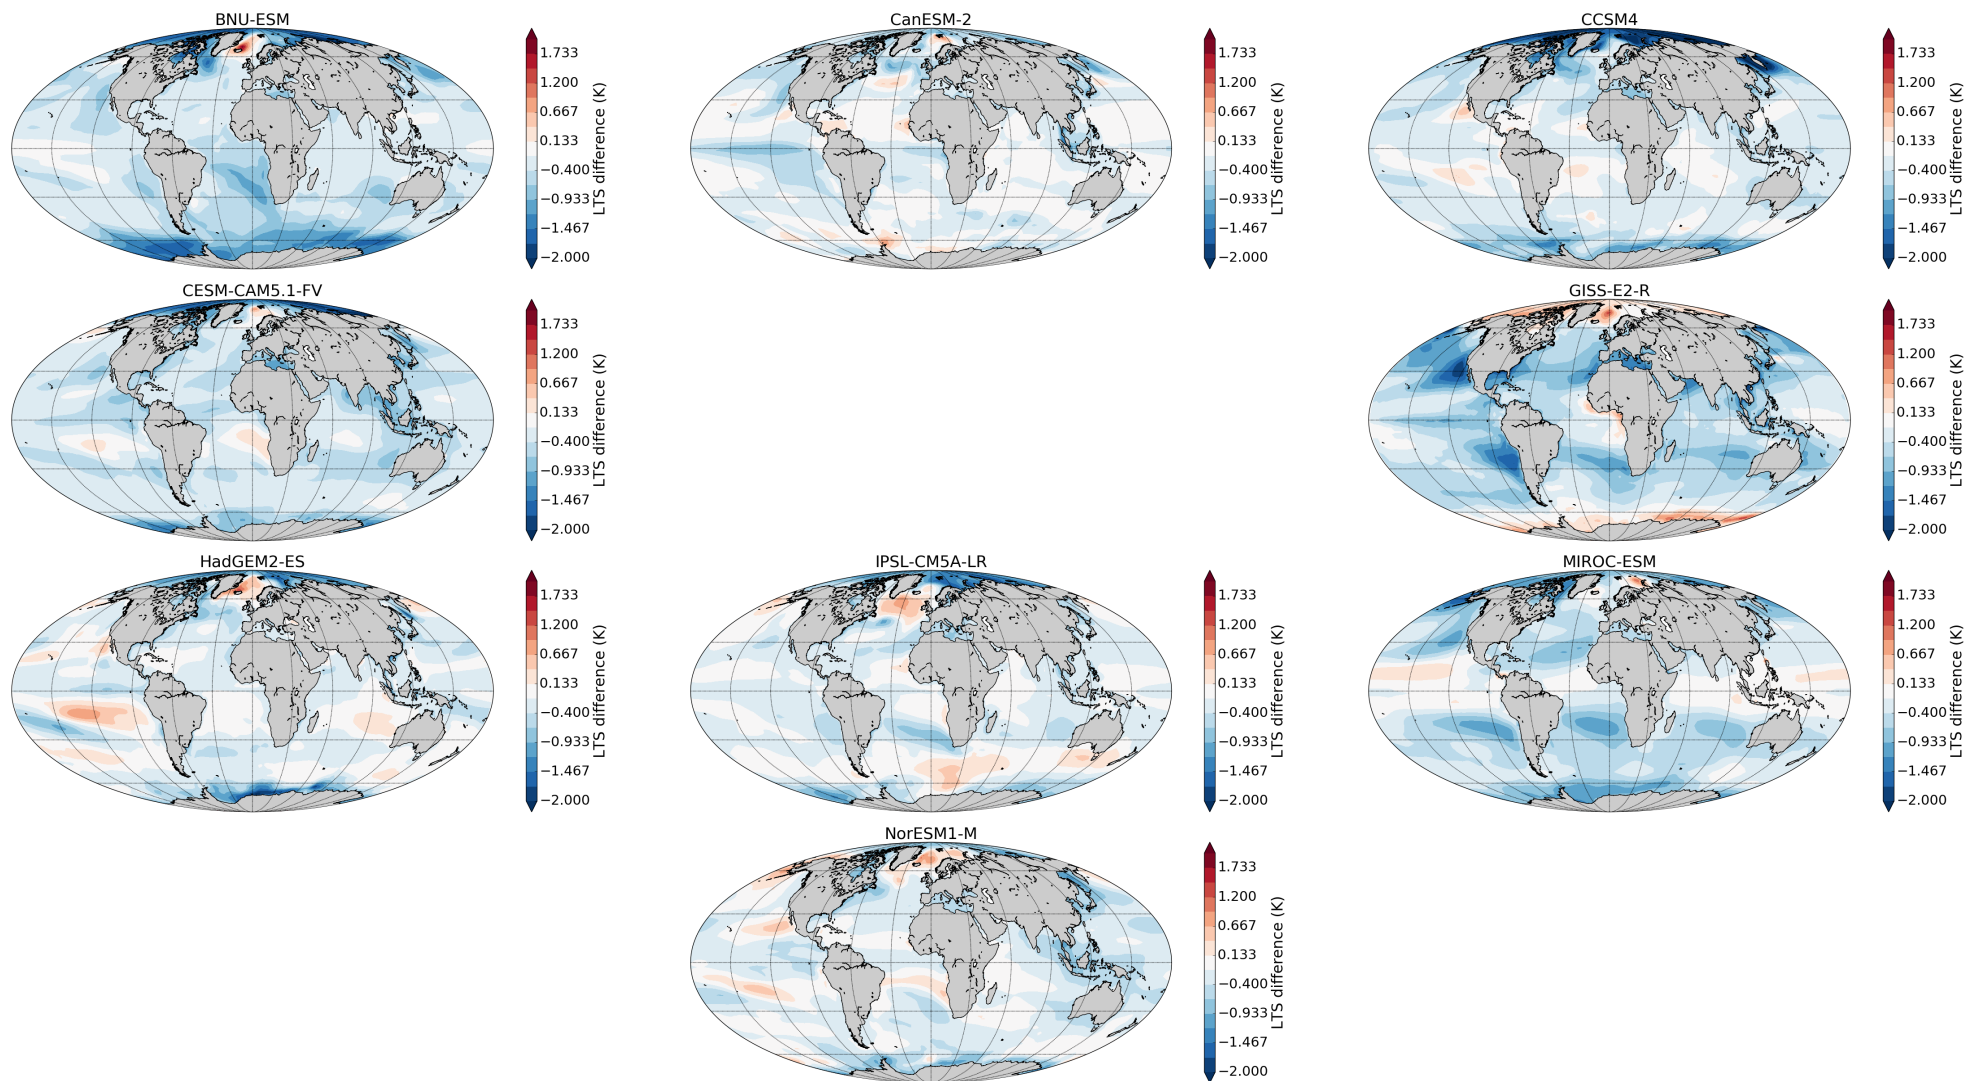

Figure S5: Change in Lower Tropospheric Stability in G1 minus piControl in each model.

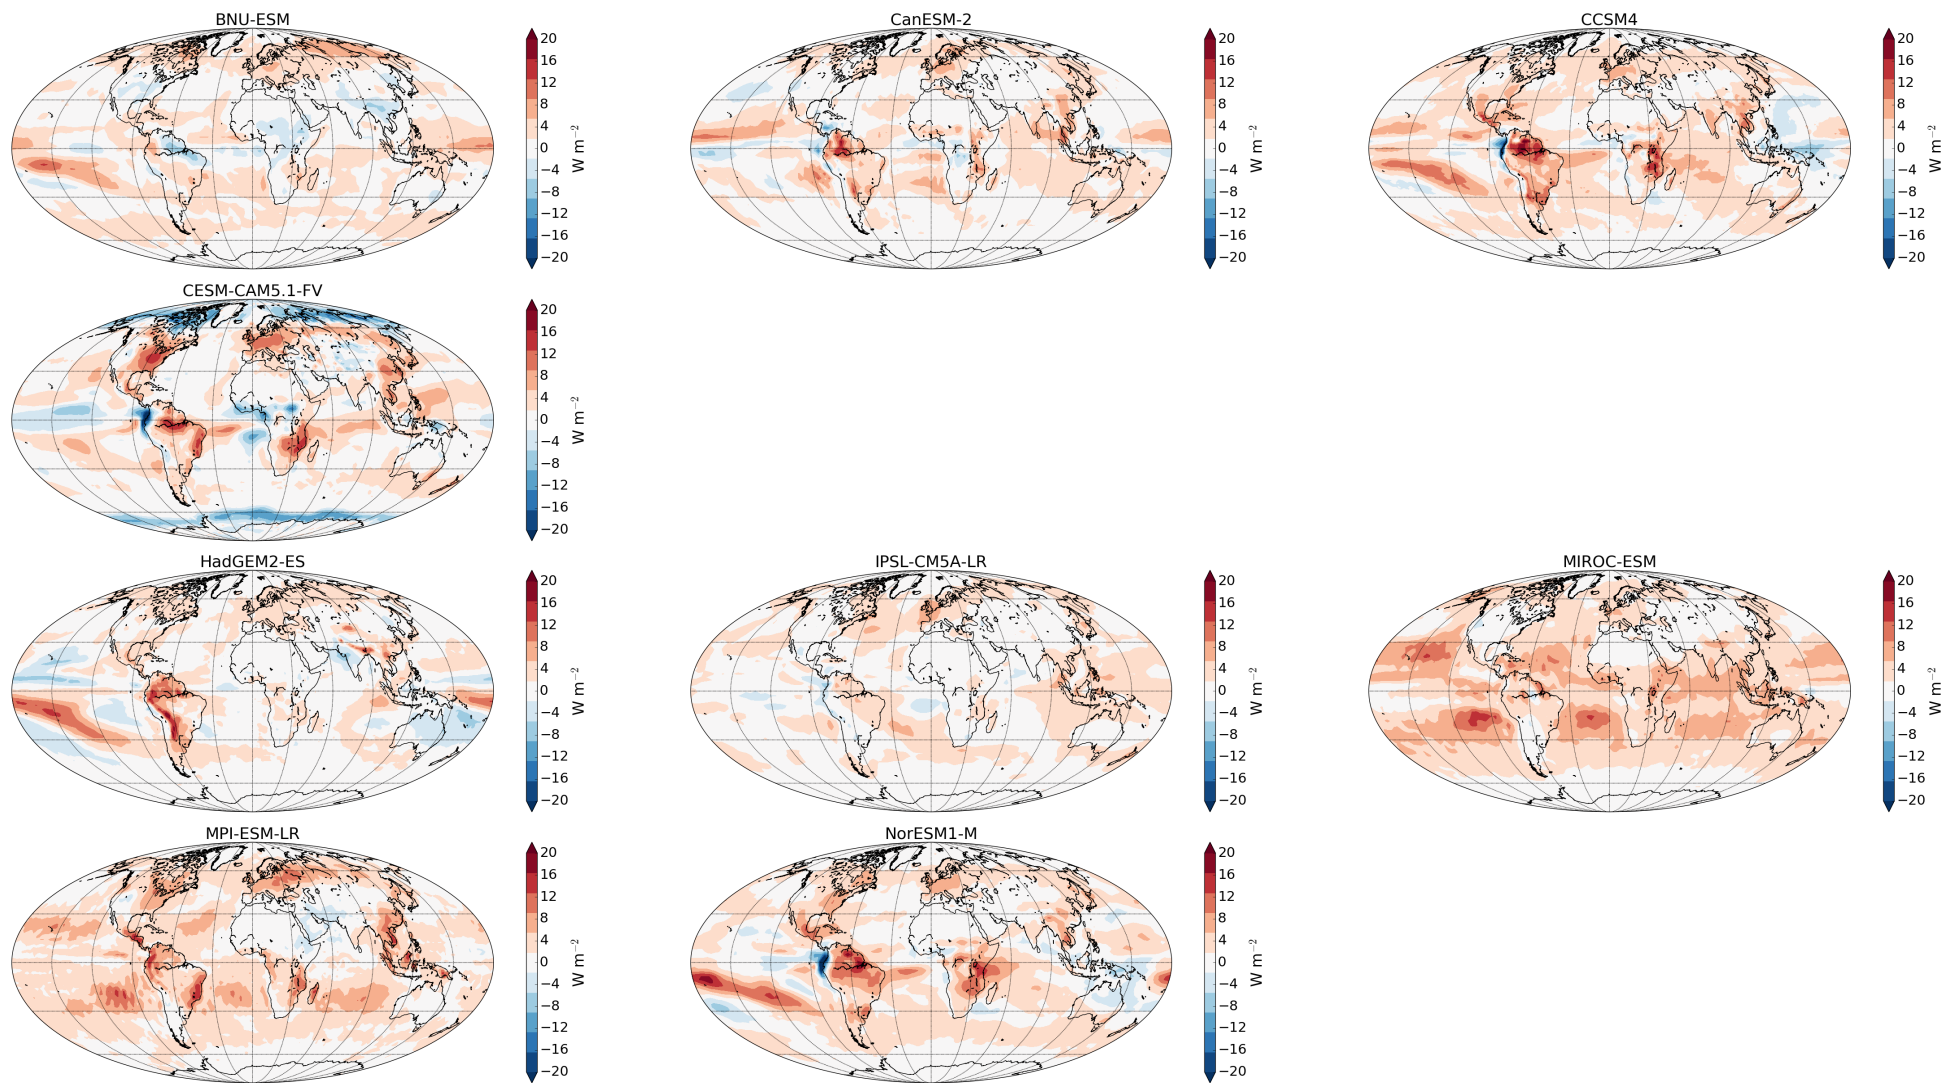

Figure S6: Change in net downward SW radiation at TOA due to changes in cloud properties, for G1 minus piControl in each model, calculated using APRP.

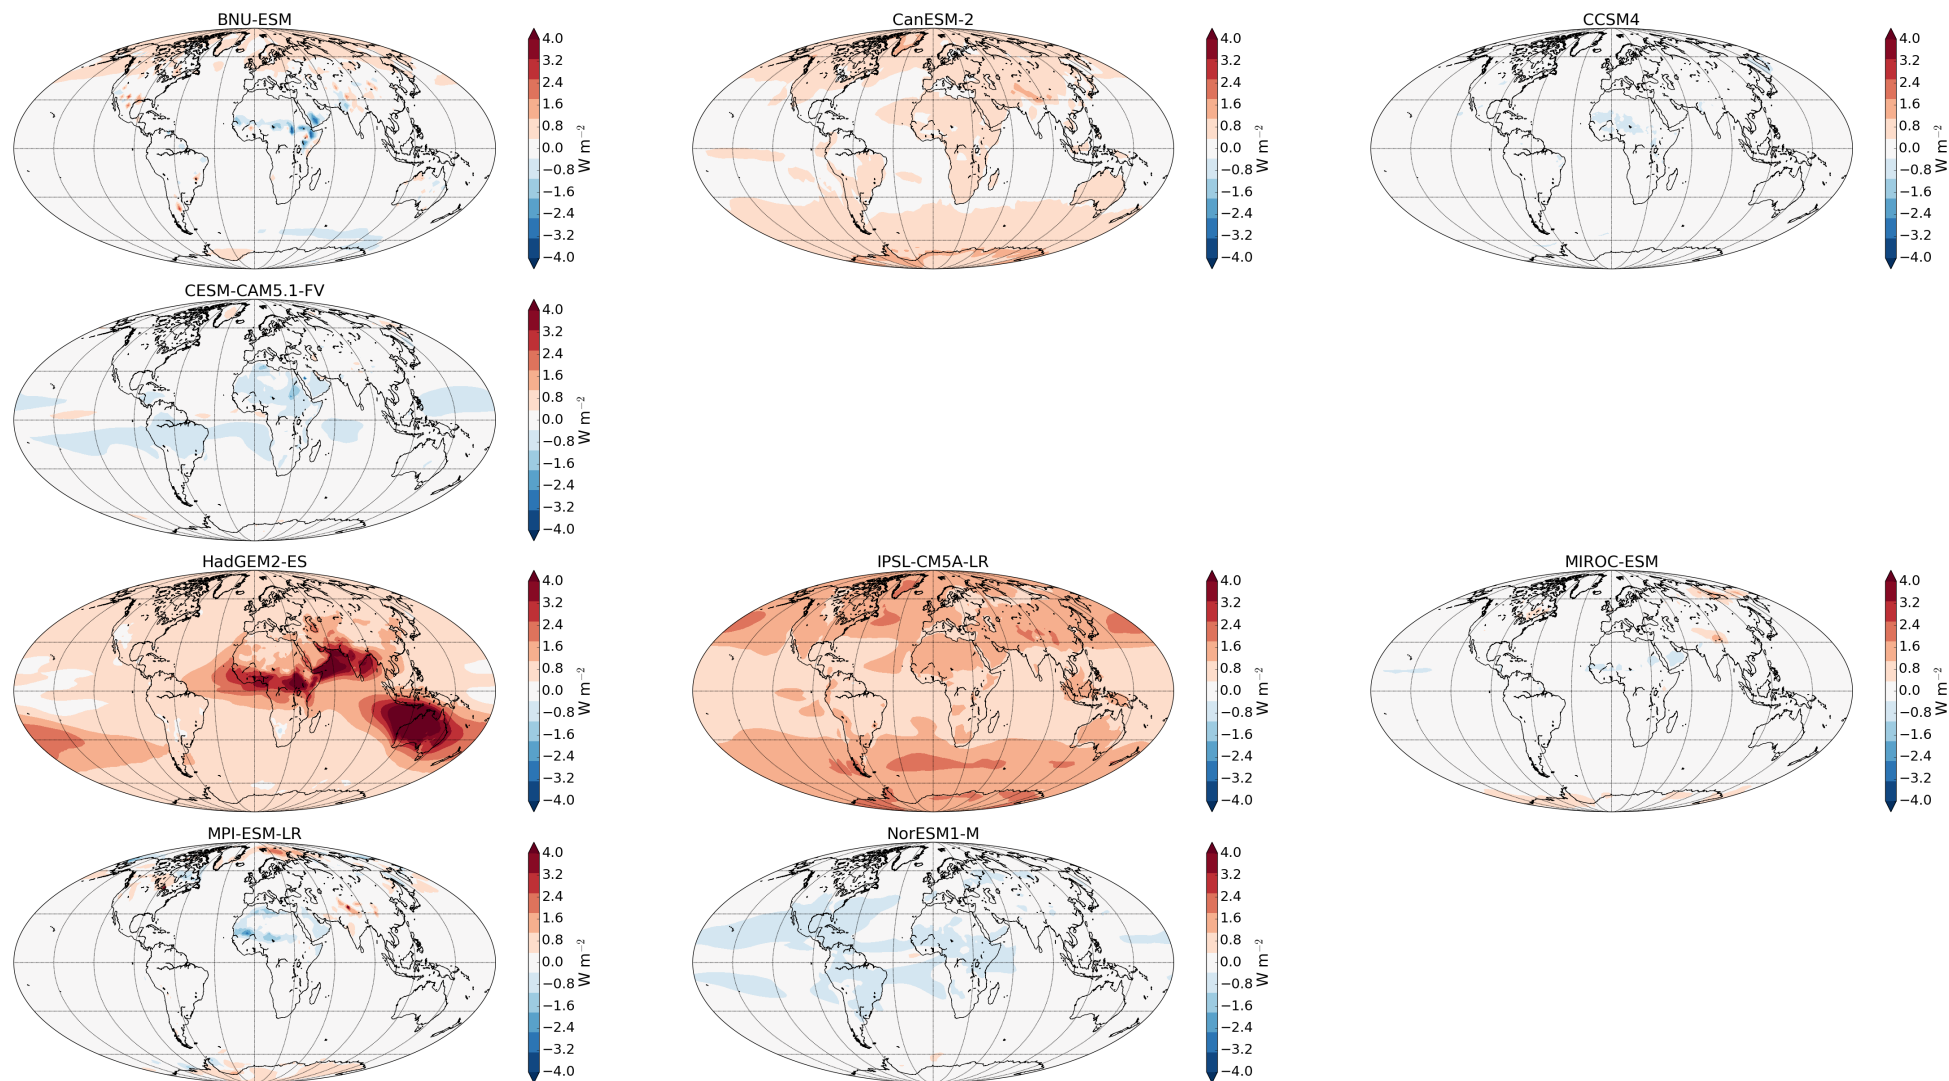

Figure S7: As in Figure S6 but for changes in non-cloud atmospheric properties.



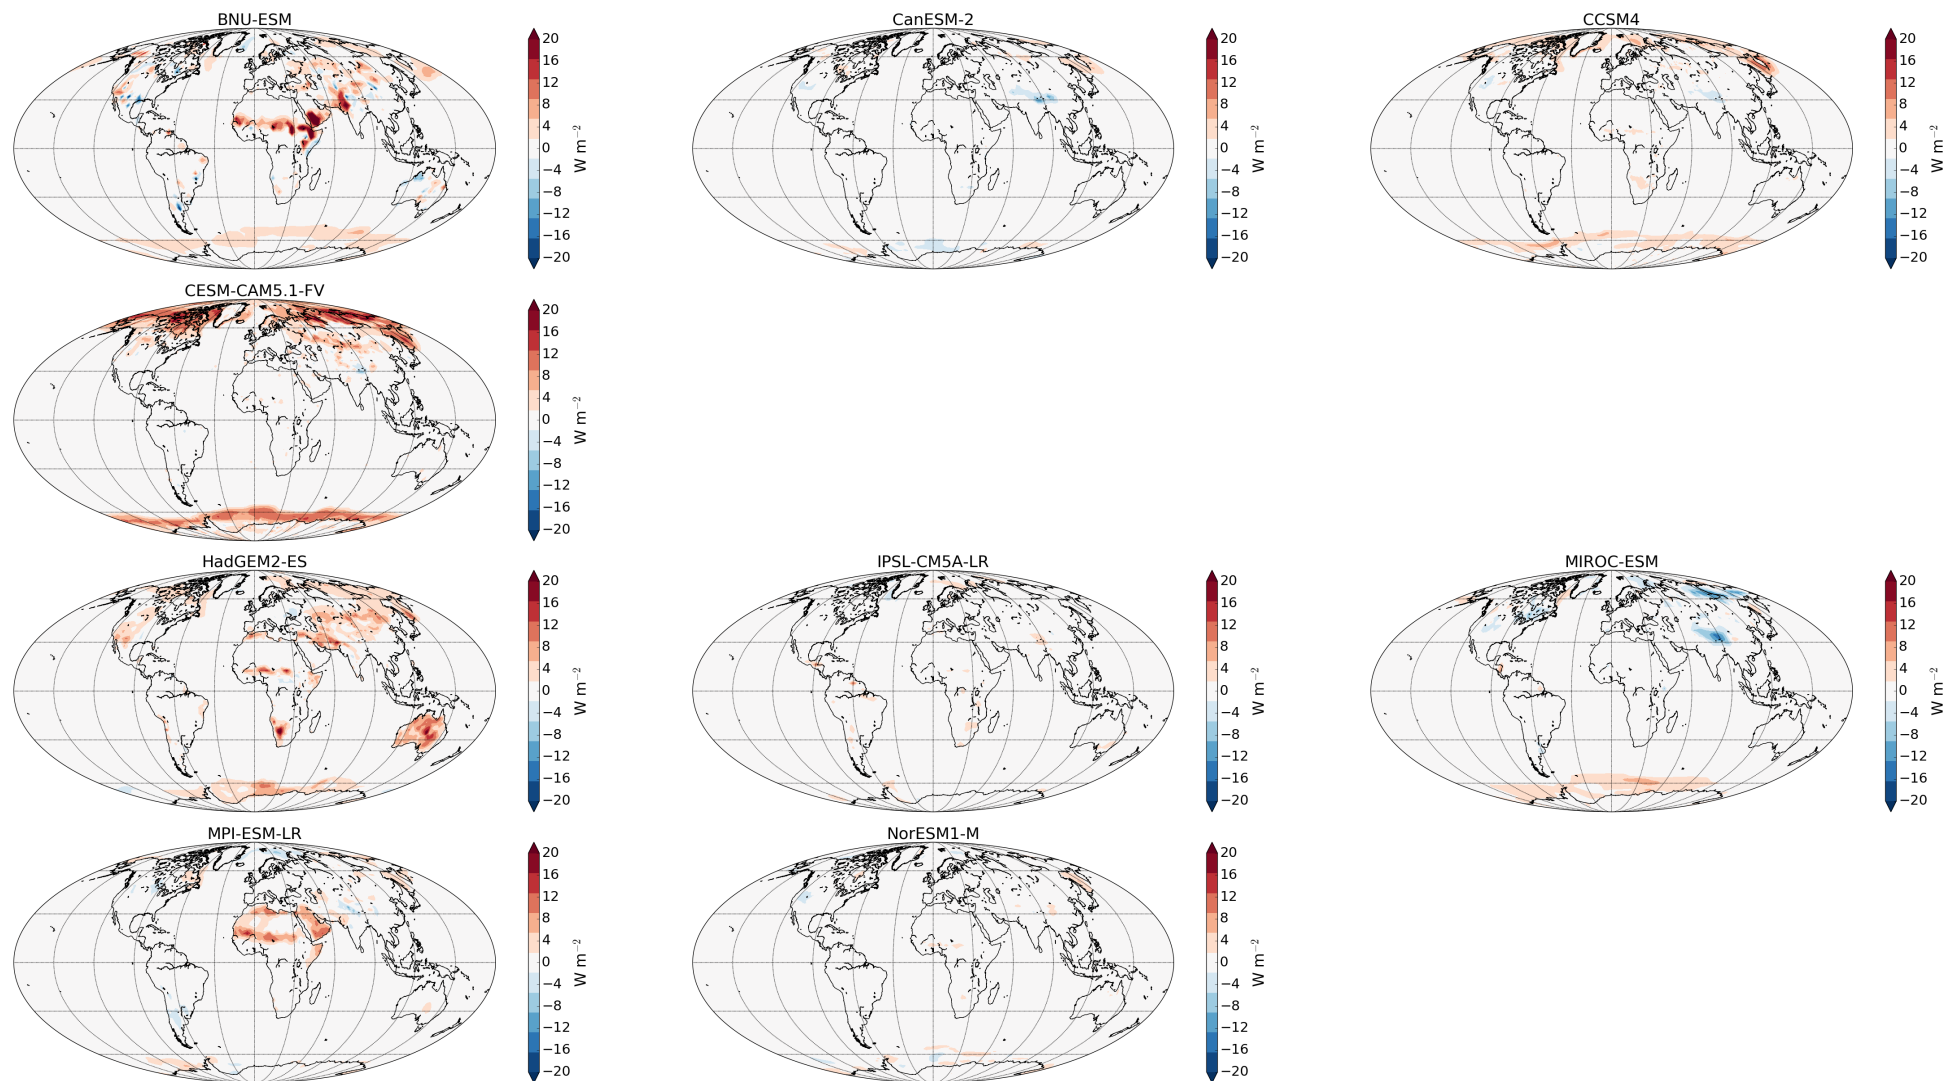

Figure S8: As in Figure S6 but for changes in surface albedo.

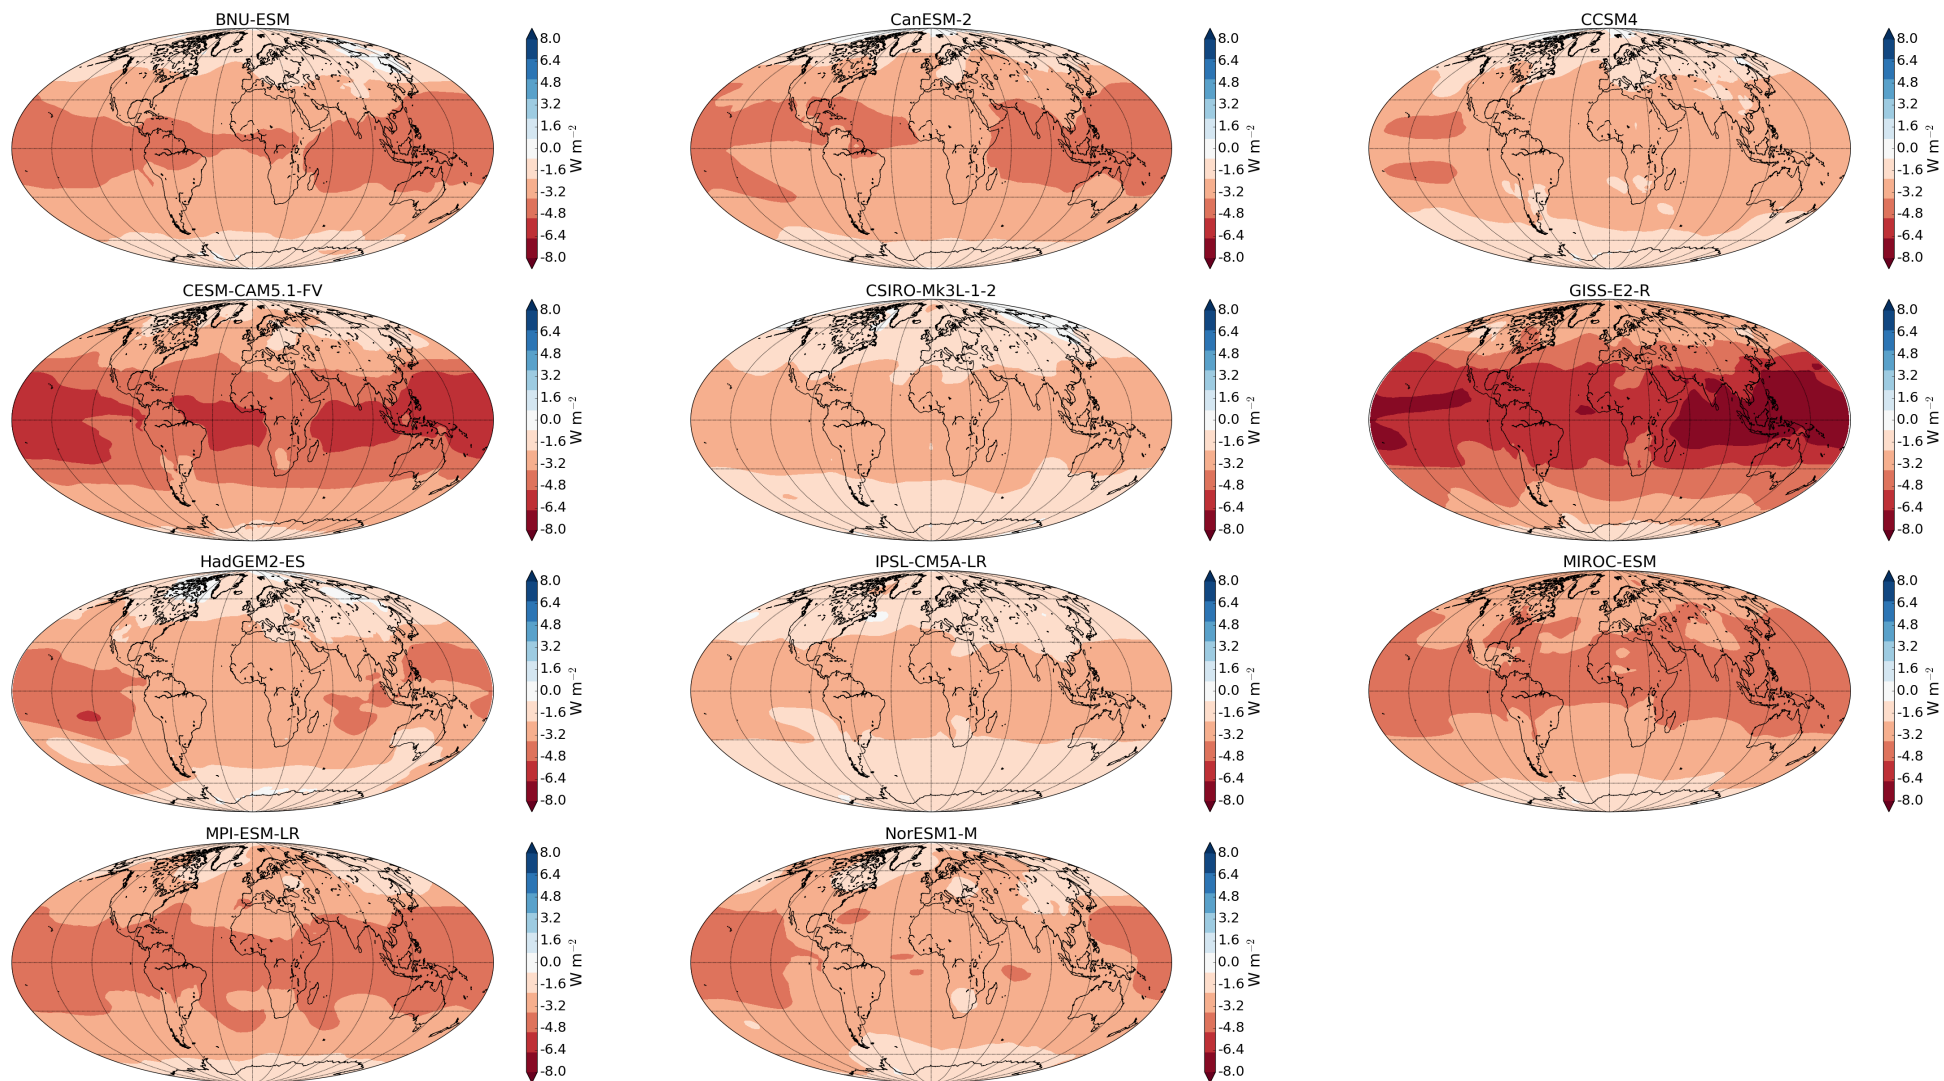

Figure S9: Change OLR due to atmospheric temperature change, calculated using radiative kernels, in G1 minus piControl in each model.

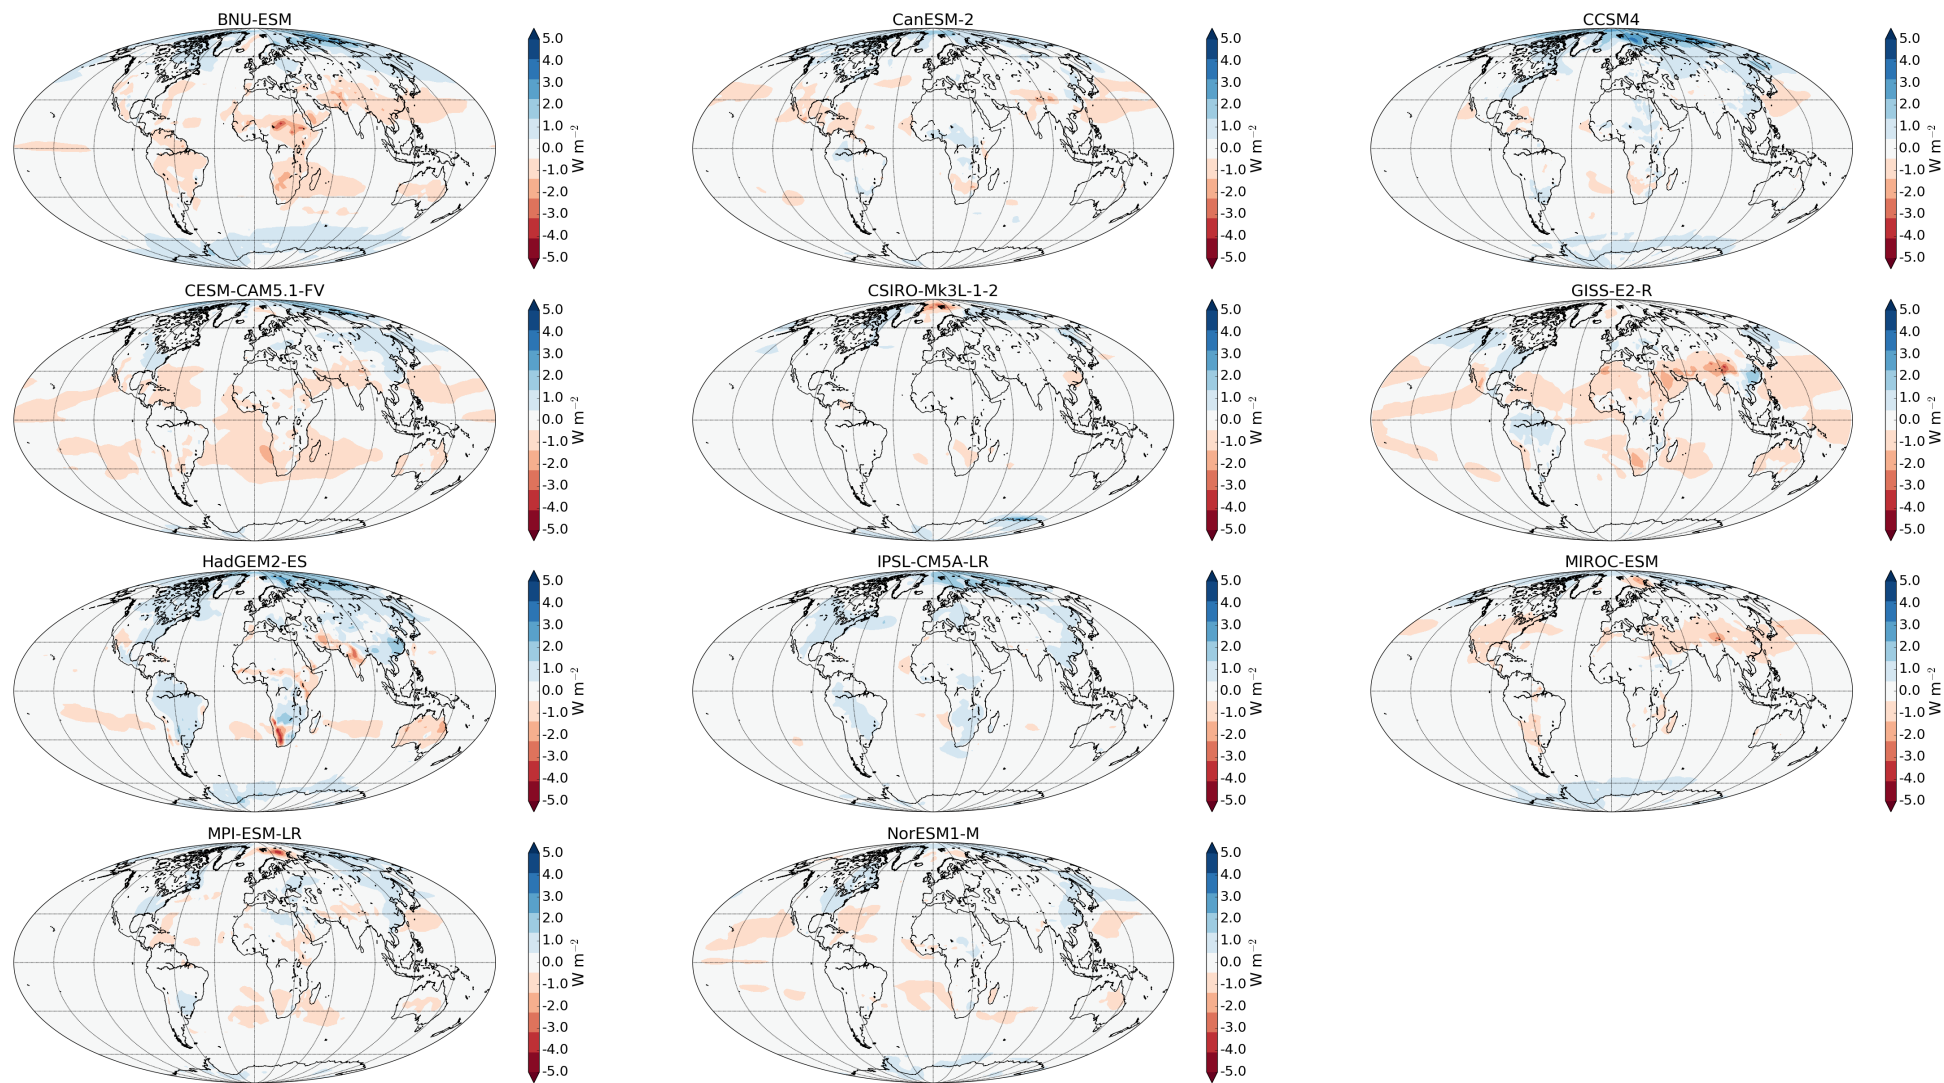

Figure S10: Change OLR due to surface temperature change, calculated using radiative kernels, in G1 minus piControl in each model.



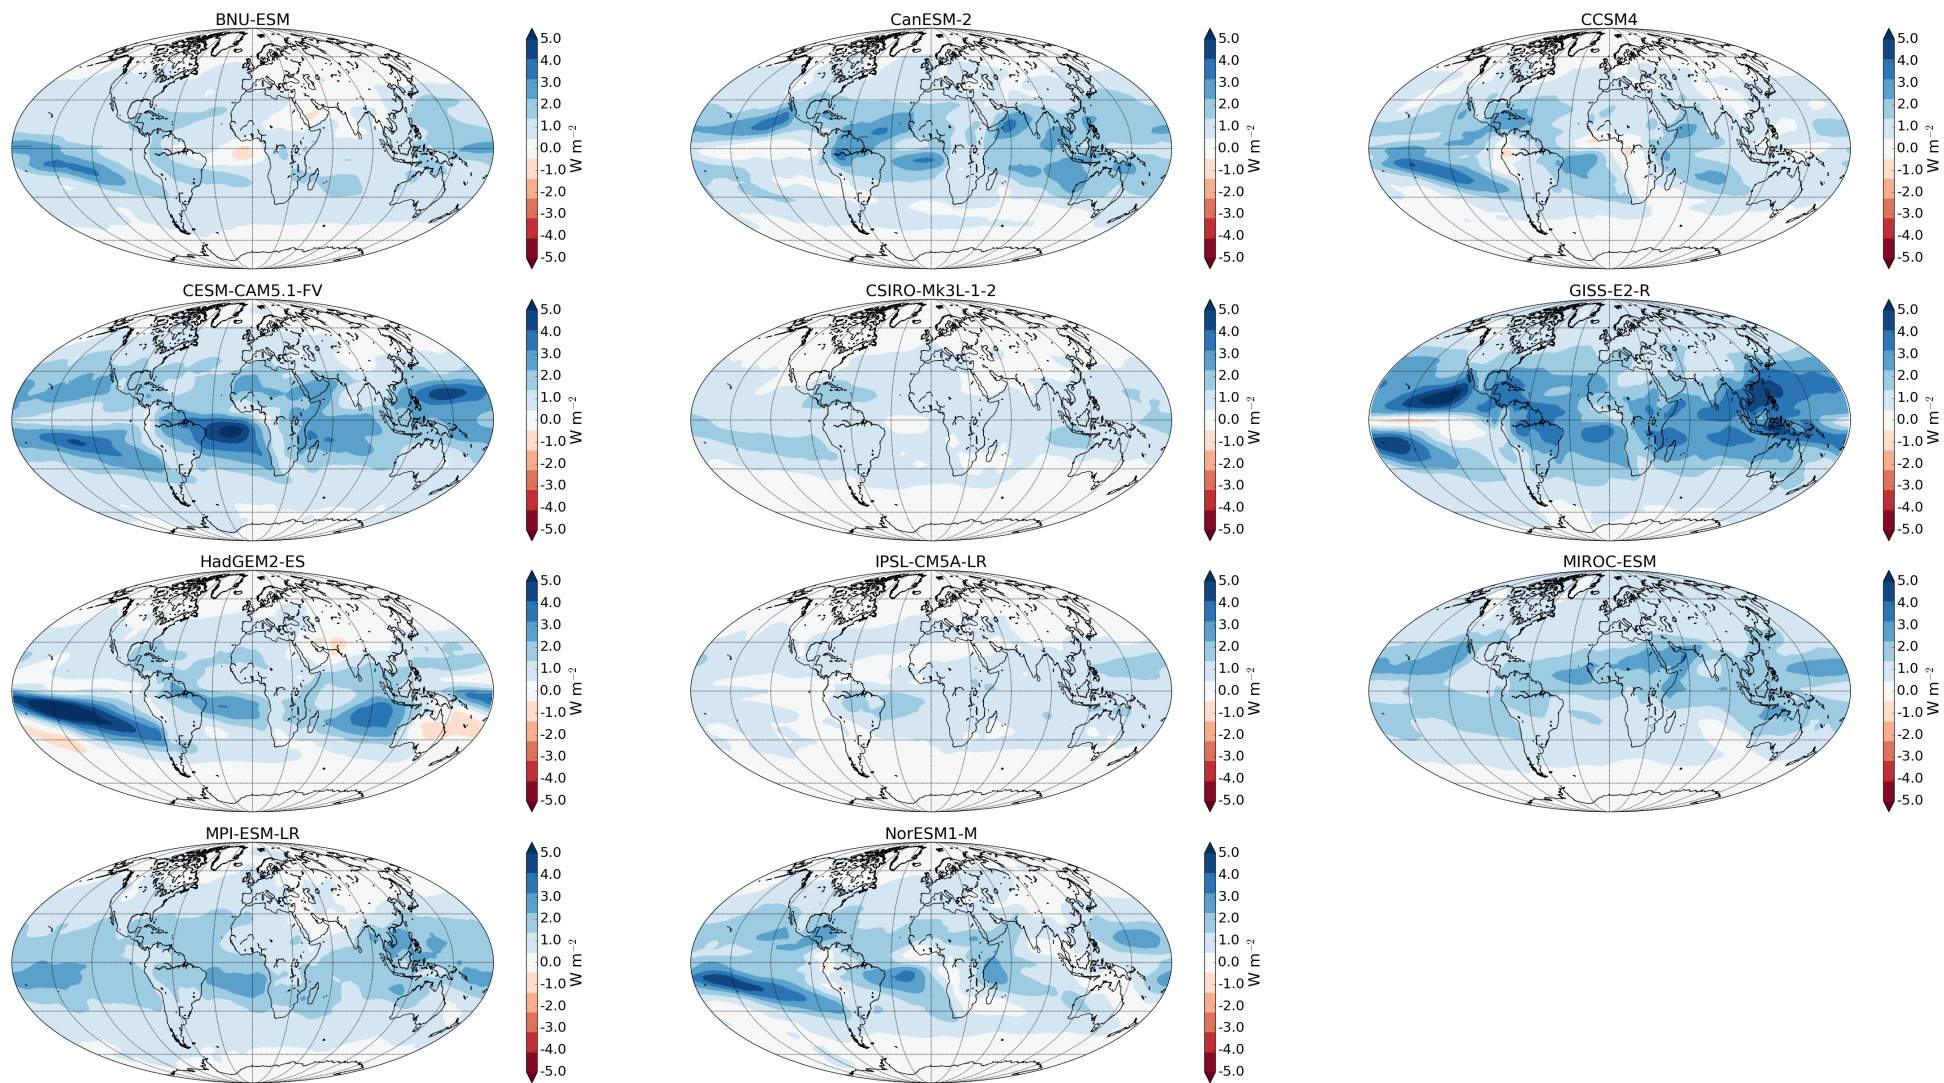

Figure S11: Change OLR due to water vapor change, calculated using radiative kernels, in G1 minus piControl in each model.

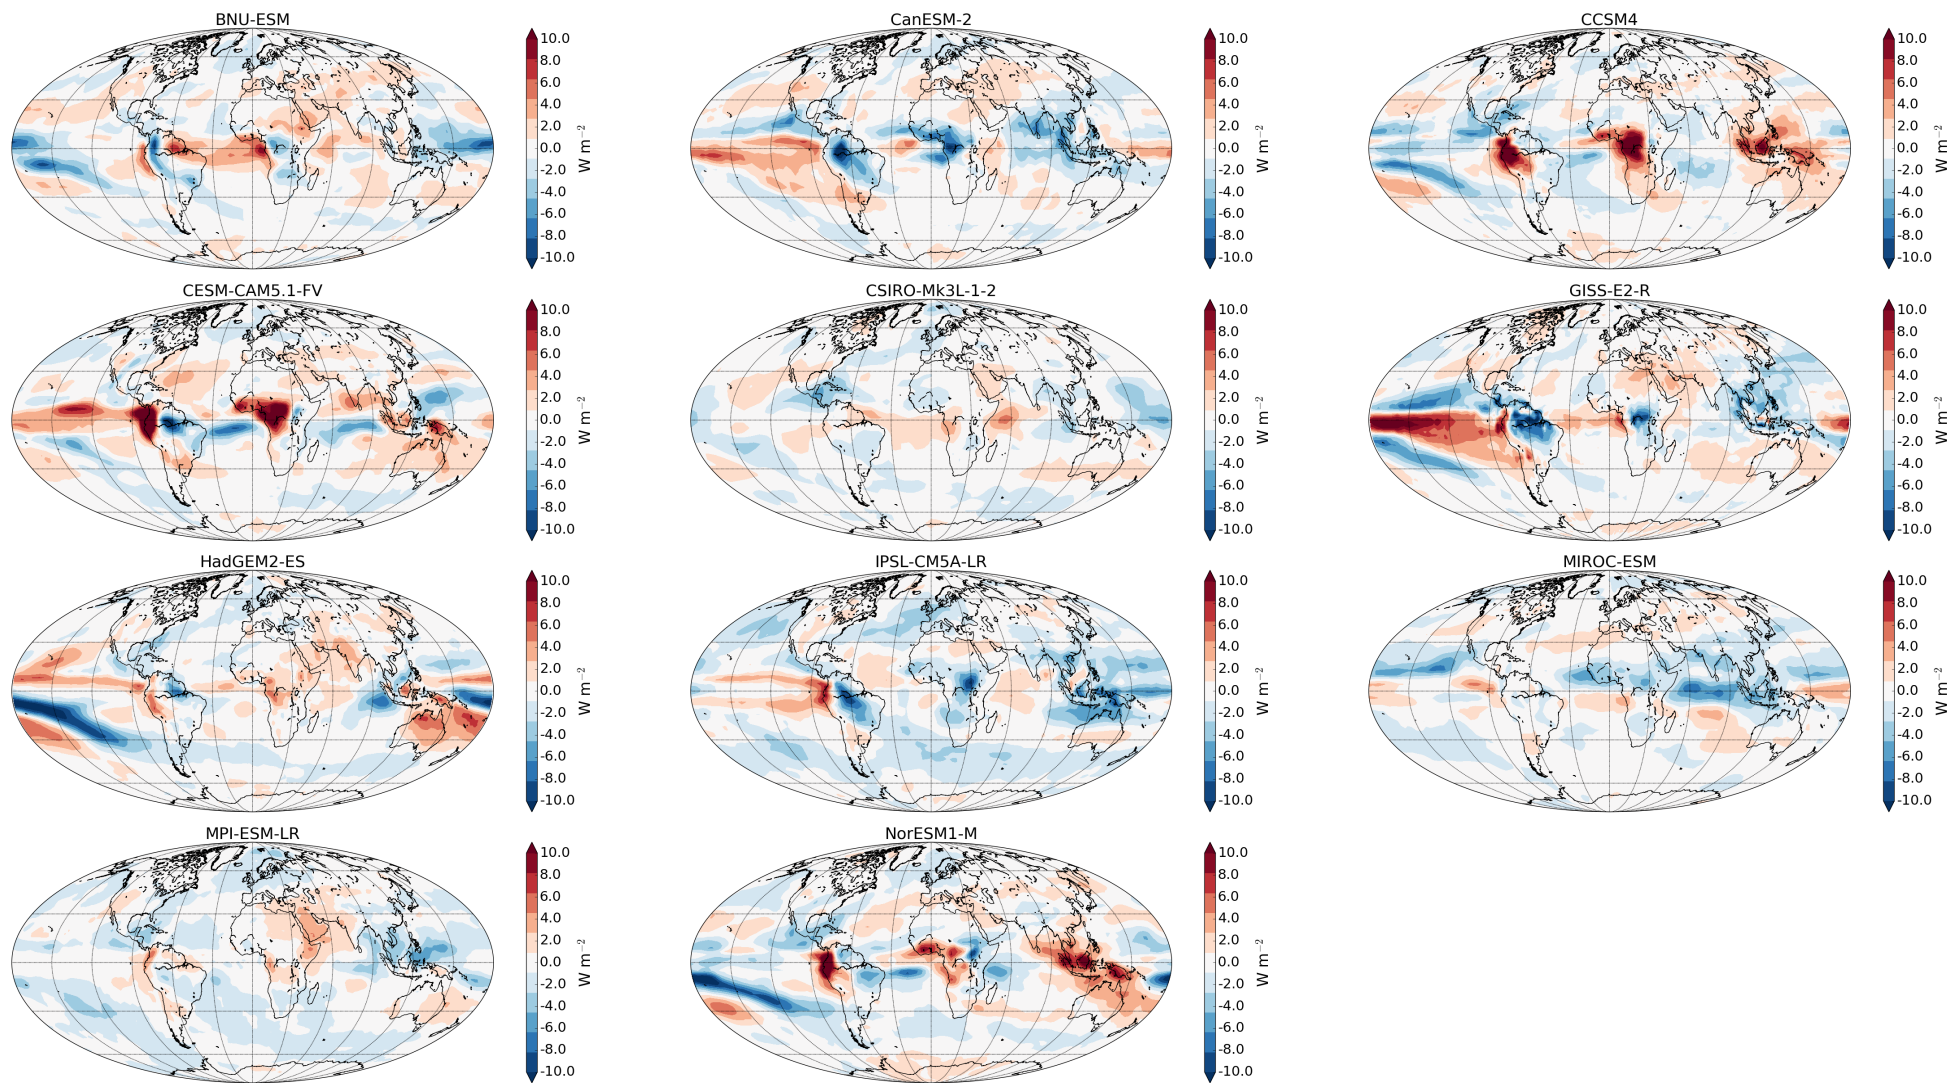

Figure S12: Change in LW cloud radiative effect, corrected for cloud masking effects using radiative kernels, in G1 minus piControl in each model.

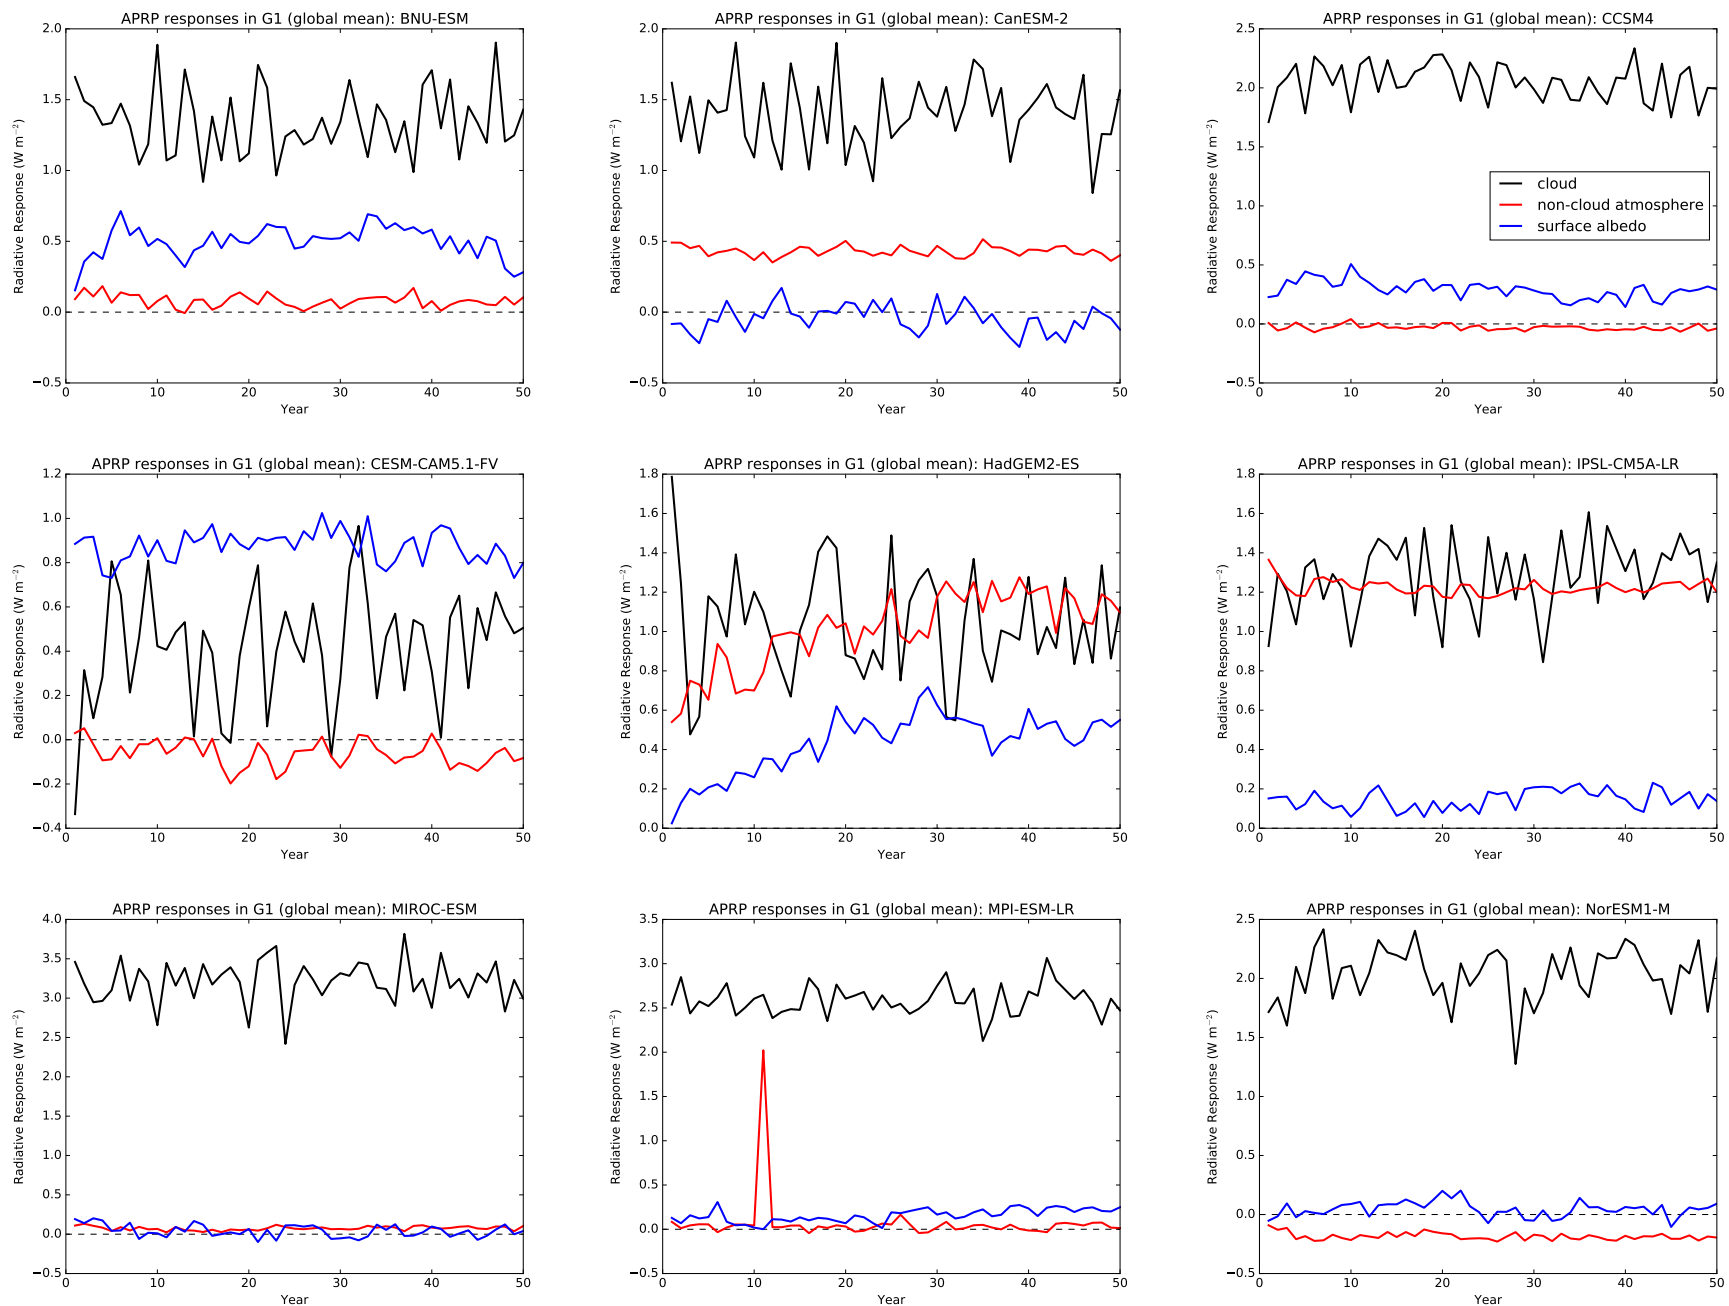

Figure S13: Time series of global mean SW radiative responses calculated using APRP for each year of G1 minus the 40-year piControl baseline, in each of nine models.
